# Supplementary material for: Commoncis-regulatory variation modifies the penetrance of pathogenicSHROOM3variants in craniofacial microsomia
Source: HighWire-hosted journal article supplement (doi:10.1101/gr.280047.124), 2025-04-15
Supplement: Supplemental_Data.xlsx [file Supplemental_Data.xlsx]

## Sheet: Figure3B-C
Figure 3D-E. Risk allele combinations with rs10017322 in CFM patients and healthy controls.
SNP_A	SNP_B	Number of risk allele	Count of combination in CFM	Ratio of combination in CFM	Count of combination in 361 CFM	Ratio of combination in 361 CFM	Count of combination in Healthy	Ratio of combination in Healthy	Ratio of risk allele proportion (CFM vs Healthy controls)	Ratio of risk allele proportion (361 CFM vs Healthy controls)
4_76620020_A_G	4_76544608_T_G	0	0	0	0	0	0	0	#DIV/0!	#DIV/0!
4_76620020_A_G	4_76544608_T_G	1	6	0.298656	0	0	10	0.380952	0.783972	0
4_76620020_A_G	4_76544608_T_G	2	235	11.6974	8	2.21607	472	17.981	0.650542	0.123245
4_76620020_A_G	4_76544608_T_G	3	511	25.4355	14	3.87812	1216	46.3238	0.549081	0.0837176
4_76620020_A_G	4_76544608_T_G	4	1257	62.5684	339	93.9058	927	35.3143	1.77176	2.65915
4_76620020_A_G	4_76547441_C_A	0	24	1.19462	4	1.10803	28	1.06667	1.11996	1.03878
4_76620020_A_G	4_76547441_C_A	1	195	9.70632	11	3.04709	397	15.1238	0.641791	0.201476
4_76620020_A_G	4_76547441_C_A	2	985	49.0294	250	69.2521	1307	49.7905	0.984714	1.39087
4_76620020_A_G	4_76547441_C_A	3	663	33.0015	79	21.8837	744	28.3429	1.16437	0.772105
4_76620020_A_G	4_76547441_C_A	4	142	7.06819	17	4.70914	149	5.67619	1.24524	0.829631
4_76620020_A_G	4_76548753_G_A	0	122	6.07267	2	0.554017	228	8.68571	0.699156	0.0637848
4_76620020_A_G	4_76548753_G_A	1	216	10.7516	4	1.10803	515	19.619	0.548019	0.0564774
4_76620020_A_G	4_76548753_G_A	2	520	25.8835	36	9.9723	877	33.4095	0.774735	0.298487
4_76620020_A_G	4_76548753_G_A	3	740	36.8342	129	35.7341	652	24.8381	1.48297	1.43868
4_76620020_A_G	4_76548753_G_A	4	411	20.4579	190	52.6316	353	13.4476	1.52131	3.91382
4_76620020_A_G	4_76549147_G_A	0	101	5.02738	2	0.554017	186	7.08571	0.709509	0.0781878
4_76620020_A_G	4_76549147_G_A	1	171	8.5117	2	0.554017	403	15.3524	0.554422	0.0360867
4_76620020_A_G	4_76549147_G_A	2	419	20.8561	22	6.09418	806	30.7048	0.679248	0.198477
4_76620020_A_G	4_76549147_G_A	3	638	31.7571	75	20.7756	689	26.2476	1.2099	0.791524
4_76620020_A_G	4_76549147_G_A	4	680	33.8477	260	72.0222	541	20.6095	1.64233	3.49461
4_76620020_A_G	4_76549429_A_C	0	123	6.12245	2	0.554017	228	8.68571	0.704887	0.0637848
4_76620020_A_G	4_76549429_A_C	1	214	10.6521	5	1.38504	515	19.619	0.542945	0.0705968
4_76620020_A_G	4_76549429_A_C	2	521	25.9333	36	9.9723	866	32.9905	0.786084	0.302278
4_76620020_A_G	4_76549429_A_C	3	703	34.9925	111	30.7479	658	25.0667	1.39598	1.22665
4_76620020_A_G	4_76549429_A_C	4	448	22.2997	207	57.3407	358	13.6381	1.6351	4.20445
4_76620020_A_G	4_76549437_T_C	0	102	5.07715	2	0.554017	186	7.08571	0.716534	0.0781878
4_76620020_A_G	4_76549437_T_C	1	164	8.16327	3	0.831025	402	15.3143	0.533049	0.0542647
4_76620020_A_G	4_76549437_T_C	2	424	21.105	20	5.54017	801	30.5143	0.691644	0.18156
4_76620020_A_G	4_76549437_T_C	3	620	30.8611	71	19.6676	693	26.4	1.16898	0.744984
4_76620020_A_G	4_76549437_T_C	4	699	34.7934	265	73.4072	543	20.6857	1.682	3.54869
4_76620020_A_G	4_76549615_C_T	0	25	1.2444	3	0.831025	21	0.8	1.5555	1.03878
4_76620020_A_G	4_76549615_C_T	1	168	8.36237	12	3.3241	372	14.1714	0.590087	0.234563
4_76620020_A_G	4_76549615_C_T	2	1032	51.3688	259	71.7452	1382	52.6476	0.975711	1.36274
4_76620020_A_G	4_76549615_C_T	3	643	32.006	66	18.2825	722	27.5048	1.16365	0.664705
4_76620020_A_G	4_76549615_C_T	4	141	7.01842	21	5.81717	128	4.87619	1.43932	1.19298
4_76620020_A_G	4_76549963_T_C	0	120	5.97312	2	0.554017	228	8.68571	0.687695	0.0637848
4_76620020_A_G	4_76549963_T_C	1	217	10.8014	4	1.10803	515	19.619	0.550556	0.0564774
4_76620020_A_G	4_76549963_T_C	2	518	25.784	36	9.9723	868	33.0667	0.779757	0.301582
4_76620020_A_G	4_76549963_T_C	3	740	36.8342	126	34.903	659	25.1048	1.46722	1.3903
4_76620020_A_G	4_76549963_T_C	4	414	20.6073	193	53.4626	355	13.5238	1.52378	3.95322
4_76620020_A_G	4_76550486_A_G	0	101	5.02738	2	0.554017	186	7.08571	0.709509	0.0781878
4_76620020_A_G	4_76550486_A_G	1	172	8.56147	3	0.831025	402	15.3143	0.559051	0.0542647
4_76620020_A_G	4_76550486_A_G	2	414	20.6073	20	5.54017	799	30.4381	0.677022	0.182014
4_76620020_A_G	4_76550486_A_G	3	655	32.6033	80	22.1607	695	26.4762	1.23142	0.837004
4_76620020_A_G	4_76550486_A_G	4	667	33.2006	256	70.9141	543	20.6857	1.605	3.42817
4_76620020_A_G	4_76550765_G_A	0	100	4.9776	2	0.554017	186	7.08571	0.702484	0.0781878
4_76620020_A_G	4_76550765_G_A	1	170	8.46192	3	0.831025	402	15.3143	0.552551	0.0542647
4_76620020_A_G	4_76550765_G_A	2	420	20.9059	20	5.54017	799	30.4381	0.686834	0.182014
4_76620020_A_G	4_76550765_G_A	3	643	32.006	78	21.6066	695	26.4762	1.20886	0.816078
4_76620020_A_G	4_76550765_G_A	4	676	33.6486	258	71.4681	543	20.6857	1.62666	3.45495
4_76620020_A_G	4_76550879_A_G	0	101	5.02738	2	0.554017	186	7.08571	0.709509	0.0781878
4_76620020_A_G	4_76550879_A_G	1	168	8.36237	2	0.554017	402	15.3143	0.54605	0.0361765
4_76620020_A_G	4_76550879_A_G	2	419	20.8561	23	6.37119	799	30.4381	0.685199	0.209316
4_76620020_A_G	4_76550879_A_G	3	634	31.558	76	21.0526	696	26.5143	1.19023	0.794011
4_76620020_A_G	4_76550879_A_G	4	687	34.1961	258	71.4681	542	20.6476	1.65618	3.46133
4_76620020_A_G	4_76551024_G_A	0	101	5.02738	2	0.554017	186	7.08571	0.709509	0.0781878
4_76620020_A_G	4_76551024_G_A	1	171	8.5117	3	0.831025	402	15.3143	0.555801	0.0542647
4_76620020_A_G	4_76551024_G_A	2	402	20.01	20	5.54017	797	30.3619	0.659048	0.182471
4_76620020_A_G	4_76551024_G_A	3	641	31.9064	76	21.0526	697	26.5524	1.20164	0.792872
4_76620020_A_G	4_76551024_G_A	4	694	34.5445	260	72.0222	543	20.6857	1.66997	3.48173
4_76620020_A_G	4_76551518_C_T	0	0	0	0	0	0	0	#DIV/0!	#DIV/0!
4_76620020_A_G	4_76551518_C_T	1	7	0.348432	0	0	13	0.495238	0.703565	0
4_76620020_A_G	4_76551518_C_T	2	237	11.7969	8	2.21607	467	17.7905	0.663103	0.124565
4_76620020_A_G	4_76551518_C_T	3	530	26.3813	16	4.43213	1203	45.8286	0.575651	0.0967111
4_76620020_A_G	4_76551518_C_T	4	1235	61.4734	337	93.3518	942	35.8857	1.71303	2.60136
4_76620020_A_G	4_76553207_G_C	0	0	0	0	0	0	0	#DIV/0!	#DIV/0!
4_76620020_A_G	4_76553207_G_C	1	6	0.298656	0	0	6	0.228571	1.30662	0
4_76620020_A_G	4_76553207_G_C	2	240	11.9462	8	2.21607	496	18.8952	0.632236	0.117282
4_76620020_A_G	4_76553207_G_C	3	537	26.7297	16	4.43213	1215	46.2857	0.577494	0.095756
4_76620020_A_G	4_76553207_G_C	4	1226	61.0254	337	93.3518	908	34.5905	1.76423	2.69877
4_76620020_A_G	4_76569817_A_G	0	117	5.82379	3	0.831025	240	9.14286	0.636977	0.0908934
4_76620020_A_G	4_76569817_A_G	1	126	6.27178	4	1.10803	262	9.98095	0.628375	0.111015
4_76620020_A_G	4_76569817_A_G	2	376	18.7158	6	1.66205	843	32.1143	0.582787	0.0517542
4_76620020_A_G	4_76569817_A_G	3	524	26.0826	63	17.4515	484	18.4381	1.41461	0.946493
4_76620020_A_G	4_76569817_A_G	4	866	43.106	285	78.9474	796	30.3238	1.42152	2.60348
4_76620020_A_G	4_76571002_T_G	0	150	7.4664	4	1.10803	296	11.2762	0.662139	0.0982631
4_76620020_A_G	4_76571002_T_G	1	274	13.6386	7	1.93906	641	24.419	0.558524	0.0794076
4_76620020_A_G	4_76571002_T_G	2	650	32.3544	73	20.2216	856	32.6095	0.992177	0.620114
4_76620020_A_G	4_76571002_T_G	3	666	33.1508	149	41.2742	601	22.8952	1.44794	1.80274
4_76620020_A_G	4_76571002_T_G	4	269	13.3897	128	35.4571	231	8.8	1.52156	4.02921
4_76620020_A_G	4_76573468_T_C	0	116	5.77402	3	0.831025	237	9.02857	0.639527	0.0920439
4_76620020_A_G	4_76573468_T_C	1	89	4.43006	3	0.831025	164	6.24762	0.70908	0.133015
4_76620020_A_G	4_76573468_T_C	2	360	17.9194	12	3.3241	890	33.9048	0.528521	0.0980423
4_76620020_A_G	4_76573468_T_C	3	427	21.2544	43	11.9114	334	12.7238	1.67044	0.936147
4_76620020_A_G	4_76573468_T_C	4	1017	50.6222	300	83.1025	1000	38.0952	1.32883	2.18144
4_76620020_A_G	4_76574418_A_G	0	0	0	0	0	0	0	#DIV/0!	#DIV/0!
4_76620020_A_G	4_76574418_A_G	1	6	0.298656	0	0	7	0.266667	1.11996	0
4_76620020_A_G	4_76574418_A_G	2	238	11.8467	8	2.21607	486	18.5143	0.639868	0.119695
4_76620020_A_G	4_76574418_A_G	3	556	27.6755	18	4.98615	1221	46.5143	0.594988	0.107196
4_76620020_A_G	4_76574418_A_G	4	1209	60.1792	335	92.7978	911	34.7048	1.73403	2.67392
4_76620020_A_G	4_76577083_T_C	0	0	0	0	0	0	0	#DIV/0!	#DIV/0!
4_76620020_A_G	4_76577083_T_C	1	6	0.298656	0	0	7	0.266667	1.11996	0
4_76620020_A_G	4_76577083_T_C	2	242	12.0458	8	2.21607	485	18.4762	0.651963	0.119942
4_76620020_A_G	4_76577083_T_C	3	542	26.9786	17	4.70914	1222	46.5524	0.579532	0.101158
4_76620020_A_G	4_76577083_T_C	4	1219	60.677	336	93.0748	911	34.7048	1.74838	2.6819
4_76620020_A_G	4_76579643_A_G	0	132	6.57043	1	0.277008	254	9.67619	0.679031	1.21191
4_76620020_A_G	4_76579643_A_G	1	192	9.55699	11	3.04709	464	17.6762	0.54067	0.372029
4_76620020_A_G	4_76579643_A_G	2	471	23.4445	229	63.4349	806	30.7048	0.763546	1.22349
4_76620020_A_G	4_76579643_A_G	3	673	33.4993	105	29.0859	635	24.1905	1.38481	0.863692
4_76620020_A_G	4_76579643_A_G	4	541	26.9288	15	4.15512	466	17.7524	1.51691	0.685988
4_76620020_A_G	4_76579794_A_G	0	111	5.52514	3	0.831025	239	9.10476	0.60684	0.0912737
4_76620020_A_G	4_76579794_A_G	1	89	4.43006	4	1.10803	130	4.95238	0.894532	0.223737
4_76620020_A_G	4_76579794_A_G	2	390	19.4126	7	1.93906	915	34.8571	0.55692	0.0556287
4_76620020_A_G	4_76579794_A_G	3	377	18.7656	55	15.2355	283	10.781	1.74062	1.41318
4_76620020_A_G	4_76579794_A_G	4	1042	51.8666	292	80.8864	1058	40.3048	1.28686	2.00687
4_76620020_A_G	4_76581967_T_G	0	120	5.97312	3	0.831025	245	9.33333	0.639977	0.0890384
4_76620020_A_G	4_76581967_T_G	1	116	5.77402	4	1.10803	224	8.53333	0.676643	0.129848
4_76620020_A_G	4_76581967_T_G	2	384	19.114	7	1.93906	873	33.2571	0.574733	0.058305
4_76620020_A_G	4_76581967_T_G	3	467	23.2454	59	16.3435	424	16.1524	1.43913	1.01183
4_76620020_A_G	4_76581967_T_G	4	922	45.8935	288	79.7784	859	32.7238	1.40245	2.43793
4_76620020_A_G	4_76582192_T_TAGAAA	0	118	5.87357	3	0.831025	244	9.29524	0.63189	0.0894033
4_76620020_A_G	4_76582192_T_TAGAAA	1	120	5.97312	4	1.10803	224	8.53333	0.699975	0.129848
4_76620020_A_G	4_76582192_T_TAGAAA	2	382	19.0144	8	2.21607	874	33.2952	0.571086	0.0665581
4_76620020_A_G	4_76582192_T_TAGAAA	3	466	23.1956	56	15.5125	423	16.1143	1.43944	0.962653
4_76620020_A_G	4_76582192_T_TAGAAA	4	923	45.9433	290	80.3324	860	32.7619	1.40234	2.45201
4_76620020_A_G	4_76583247_T_C	0	137	6.81931	3	0.831025	284	10.819	0.630306	0.0768113
4_76620020_A_G	4_76583247_T_C	1	155	7.71528	6	1.66205	298	11.3524	0.679618	0.146405
4_76620020_A_G	4_76583247_T_C	2	437	21.7521	17	4.70914	879	33.4857	0.649594	0.140631
4_76620020_A_G	4_76583247_T_C	3	594	29.5669	98	27.1468	506	19.2762	1.53386	1.40831
4_76620020_A_G	4_76583247_T_C	4	686	34.1463	237	65.651	658	25.0667	1.36222	2.61905
4_76620020_A_G	4_76583499_C_T	0	118	5.87357	3	0.831025	245	9.33333	0.629311	0.0890384
4_76620020_A_G	4_76583499_C_T	1	114	5.67446	4	1.10803	224	8.53333	0.664976	0.129848
4_76620020_A_G	4_76583499_C_T	2	395	19.6615	7	1.93906	872	33.219	0.591875	0.0583719
4_76620020_A_G	4_76583499_C_T	3	471	23.4445	62	17.1745	424	16.1524	1.45146	1.06328
4_76620020_A_G	4_76583499_C_T	4	911	45.3459	285	78.9474	860	32.7619	1.38411	2.40973
4_76620020_A_G	4_76583914_G_A	0	120	5.97312	3	0.831025	245	9.33333	0.639977	0.0890384
4_76620020_A_G	4_76583914_G_A	1	120	5.97312	4	1.10803	223	8.49524	0.703114	0.13043
4_76620020_A_G	4_76583914_G_A	2	387	19.2633	7	1.93906	873	33.2571	0.579223	0.058305
4_76620020_A_G	4_76583914_G_A	3	464	23.0961	58	16.0665	424	16.1524	1.42989	0.994682
4_76620020_A_G	4_76583914_G_A	4	918	45.6944	289	80.0554	860	32.7619	1.39474	2.44355
4_76620020_A_G	4_76584194_T_C	0	134	6.66999	3	0.831025	286	10.8952	0.612193	0.0762741
4_76620020_A_G	4_76584194_T_C	1	153	7.61573	4	1.10803	297	11.3143	0.673107	0.0979322
4_76620020_A_G	4_76584194_T_C	2	412	20.5077	21	5.81717	881	33.5619	0.611041	0.173327
4_76620020_A_G	4_76584194_T_C	3	556	27.6755	80	22.1607	503	19.1619	1.4443	1.1565
4_76620020_A_G	4_76584194_T_C	4	754	37.5311	253	70.0831	658	25.0667	1.49725	2.79587
4_76620020_A_G	4_76586291_T_C	0	114	5.67446	3	0.831025	249	9.48571	0.598212	0.0876081
4_76620020_A_G	4_76586291_T_C	1	94	4.67894	5	1.38504	110	4.19048	1.11657	0.330521
4_76620020_A_G	4_76586291_T_C	2	372	18.5167	6	1.66205	950	36.1905	0.511645	0.0459251
4_76620020_A_G	4_76586291_T_C	3	384	19.114	55	15.2355	227	8.64762	2.21032	1.76181
4_76620020_A_G	4_76586291_T_C	4	1045	52.0159	292	80.8864	1089	41.4857	1.25383	1.94974
4_76620020_A_G	4_76589357_A_C	0	165	8.21304	3	0.831025	308	11.7333	0.699975	0.070826
4_76620020_A_G	4_76589357_A_C	1	197	9.80587	9	2.49307	441	16.8	0.583683	0.148397
4_76620020_A_G	4_76589357_A_C	2	543	27.0284	39	10.8033	858	32.6857	0.826917	0.330521
4_76620020_A_G	4_76589357_A_C	3	575	28.6212	126	34.903	541	20.6095	1.38874	1.69354
4_76620020_A_G	4_76589357_A_C	4	529	26.3315	184	50.9695	477	18.1714	1.44906	2.80493
4_76620020_A_G	4_76589448_T_A	0	168	8.36237	3	0.831025	308	11.7333	0.712702	0.070826
4_76620020_A_G	4_76589448_T_A	1	202	10.0548	9	2.49307	441	16.8	0.598497	0.148397
4_76620020_A_G	4_76589448_T_A	2	529	26.3315	43	11.9114	858	32.6857	0.805597	0.364421
4_76620020_A_G	4_76589448_T_A	3	511	25.4355	104	28.8089	542	20.6476	1.23189	1.39526
4_76620020_A_G	4_76589448_T_A	4	599	29.8158	202	55.9557	476	18.1333	1.64426	3.08579
4_76620020_A_G	4_76598951_T_C	0	129	6.42111	3	0.831025	268	10.2095	0.628933	0.081397
4_76620020_A_G	4_76598951_T_C	1	80	3.98208	5	1.38504	83	3.1619	1.25939	0.43804
4_76620020_A_G	4_76598951_T_C	2	402	20.01	12	3.3241	1003	38.2095	0.52369	0.0869966
4_76620020_A_G	4_76598951_T_C	3	346	17.2225	50	13.8504	171	6.51429	2.6438	2.12616
4_76620020_A_G	4_76598951_T_C	4	1052	52.3644	291	80.6094	1100	41.9048	1.2496	1.92363
4_76620020_A_G	4_76600336_TG_T	0	3	0.149328	0	0	2	0.0761905	1.95993	0
4_76620020_A_G	4_76600336_TG_T	1	96	4.7785	6	1.66205	187	7.12381	0.670778	0.233309
4_76620020_A_G	4_76600336_TG_T	2	1435	71.4286	298	82.5485	2081	79.2762	0.901009	1.04128
4_76620020_A_G	4_76600336_TG_T	3	423	21.0553	55	15.2355	338	12.8762	1.63521	1.18323
4_76620020_A_G	4_76600336_TG_T	4	52	2.58835	2	0.554017	17	0.647619	3.99672	0.855467
4_76620020_A_G	4_76607194_TG_T	0	149	7.41663	3	0.831025	306	11.6571	0.63623	0.0712889
4_76620020_A_G	4_76607194_TG_T	1	63	3.13589	5	1.38504	46	1.75238	1.7895	0.790377
4_76620020_A_G	4_76607194_TG_T	2	444	22.1005	13	3.60111	1079	41.1048	0.537664	0.0876081
4_76620020_A_G	4_76607194_TG_T	3	334	16.6252	58	16.0665	91	3.46667	4.79573	4.63456
4_76620020_A_G	4_76607194_TG_T	4	1019	50.7218	282	78.1163	1103	42.019	1.20711	1.85907
4_76620020_A_G	4_76607668_A_C	0	2	0.099552	0	0	1	0.0380952	2.61324	0
4_76620020_A_G	4_76607668_A_C	1	69	3.43454	7	1.93906	95	3.61905	0.949019	0.535792
4_76620020_A_G	4_76607668_A_C	2	1437	71.5281	292	80.8864	2174	82.819	0.863668	0.976665
4_76620020_A_G	4_76607668_A_C	3	447	22.2499	59	16.3435	340	12.9524	1.71782	1.26181
4_76620020_A_G	4_76607668_A_C	4	54	2.6879	3	0.831025	15	0.571429	4.70383	1.45429
4_76620020_A_G	4_76607762_C_T	0	149	7.41663	3	0.831025	306	11.6571	0.63623	0.0712889
4_76620020_A_G	4_76607762_C_T	1	67	3.33499	5	1.38504	46	1.75238	1.90312	0.790377
4_76620020_A_G	4_76607762_C_T	2	445	22.1503	14	3.87812	1078	41.0667	0.539375	0.0944347
4_76620020_A_G	4_76607762_C_T	3	327	16.2768	57	15.7895	92	3.50476	4.64418	4.50515
4_76620020_A_G	4_76607762_C_T	4	1021	50.8213	282	78.1163	1103	42.019	1.20948	1.85907
4_76620020_A_G	4_76610715_A_AT	0	150	7.4664	3	0.831025	305	11.619	0.6426	0.0715226
4_76620020_A_G	4_76610715_A_AT	1	62	3.08611	5	1.38504	46	1.75238	1.7611	0.790377
4_76620020_A_G	4_76610715_A_AT	2	440	21.9014	14	3.87812	1081	41.181	0.531834	0.0941726
4_76620020_A_G	4_76610715_A_AT	3	333	16.5754	56	15.5125	89	3.39048	4.88881	4.57531
4_76620020_A_G	4_76610715_A_AT	4	1024	50.9706	283	78.3934	1104	42.0571	1.21194	1.86397
4_76620020_A_G	4_76616368_G_A	0	149	7.41663	3	0.831025	309	11.7714	0.630053	0.0705968
4_76620020_A_G	4_76616368_G_A	1	55	2.73768	4	1.10803	39	1.48571	1.84267	0.745792
4_76620020_A_G	4_76616368_G_A	2	443	22.0508	15	4.15512	1084	41.2952	0.533979	0.10062
4_76620020_A_G	4_76616368_G_A	3	330	16.4261	49	13.5734	83	3.1619	5.195	4.29279
4_76620020_A_G	4_76616368_G_A	4	1032	51.3688	290	80.3324	1110	42.2857	1.2148	1.89975
4_76620020_A_G	4_76616835_T_C	0	158	7.86461	4	1.10803	340	12.9524	0.607194	0.0855467
4_76620020_A_G	4_76616835_T_C	1	55	2.73768	5	1.38504	6	0.228571	11.9774	6.05956
4_76620020_A_G	4_76616835_T_C	2	456	22.6979	14	3.87812	1131	43.0857	0.526807	0.0900093
4_76620020_A_G	4_76616835_T_C	3	325	16.1772	57	15.7895	36	1.37143	11.7959	11.5132
4_76620020_A_G	4_76616835_T_C	4	1015	50.5226	281	77.8393	1112	42.3619	1.19264	1.83748
4_76620020_A_G	4_76617283_A_ATAG	0	158	7.86461	4	1.10803	345	13.1429	0.598394	0.0843069
4_76620020_A_G	4_76617283_A_ATAG	1	52	2.58835	5	1.38504	1	0.0380952	67.9443	36.3573
4_76620020_A_G	4_76617283_A_ATAG	2	458	22.7974	13	3.60111	1149	43.7714	0.520829	0.0822707
4_76620020_A_G	4_76617283_A_ATAG	3	319	15.8785	58	16.0665	17	0.647619	24.5183	24.8085
4_76620020_A_G	4_76617283_A_ATAG	4	1022	50.8711	281	77.8393	1113	42.4	1.19979	1.83583
4_76620020_A_G	4_76619036_C_T	0	159	7.91439	4	1.10803	343	13.0667	0.605693	0.0847985
4_76620020_A_G	4_76619036_C_T	1	56	2.78746	4	1.10803	3	0.114286	24.3902	9.69529
4_76620020_A_G	4_76619036_C_T	2	448	22.2997	15	4.15512	1149	43.7714	0.509457	0.0949278
4_76620020_A_G	4_76619036_C_T	3	327	16.2768	57	15.7895	17	0.647619	25.1332	24.3808
4_76620020_A_G	4_76619036_C_T	4	1019	50.7218	281	77.8393	1113	42.4	1.19627	1.83583
4_76620020_A_G	4_76619184_T_G	0	158	7.86461	4	1.10803	345	13.1429	0.598394	0.0843069
4_76620020_A_G	4_76619184_T_G	1	56	2.78746	4	1.10803	1	0.0380952	73.1707	29.0859
4_76620020_A_G	4_76619184_T_G	2	456	22.6979	14	3.87812	1149	43.7714	0.518554	0.0885993
4_76620020_A_G	4_76619184_T_G	3	319	15.8785	59	16.3435	17	0.647619	24.5183	25.2363
4_76620020_A_G	4_76619184_T_G	4	1020	50.7715	280	77.5623	1113	42.4	1.19744	1.8293
4_76620020_A_G	4_76619736_G_A	0	161	8.01394	4	1.10803	345	13.1429	0.609756	0.0843069
4_76620020_A_G	4_76619736_G_A	1	47	2.33947	4	1.10803	2	0.0761905	30.7056	14.5429
4_76620020_A_G	4_76619736_G_A	2	460	22.897	15	4.15512	1148	43.7333	0.523559	0.0950105
4_76620020_A_G	4_76619736_G_A	3	319	15.8785	56	15.5125	17	0.647619	24.5183	23.9531
4_76620020_A_G	4_76619736_G_A	4	1022	50.8711	282	78.1163	1113	42.4	1.19979	1.84237
4_76620020_A_G	4_76619740_G_A	0	161	8.01394	4	1.10803	344	13.1048	0.611529	0.084552
4_76620020_A_G	4_76619740_G_A	1	47	2.33947	4	1.10803	3	0.114286	20.4704	9.69529
4_76620020_A_G	4_76619740_G_A	2	460	22.897	15	4.15512	1148	43.7333	0.523559	0.0950105
4_76620020_A_G	4_76619740_G_A	3	319	15.8785	56	15.5125	17	0.647619	24.5183	23.9531
4_76620020_A_G	4_76619740_G_A	4	1022	50.8711	282	78.1163	1113	42.4	1.19979	1.84237
4_76620020_A_G	4_76619864_C_A	0	164	8.16327	4	1.10803	345	13.1429	0.621118	0.0843069
4_76620020_A_G	4_76619864_C_A	1	46	2.2897	3	0.831025	1	0.0380952	60.1045	21.8144
4_76620020_A_G	4_76619864_C_A	2	454	22.5983	16	4.43213	1149	43.7714	0.51628	0.101256
4_76620020_A_G	4_76619864_C_A	3	293	14.5844	52	14.4044	17	0.647619	22.52	22.2421
4_76620020_A_G	4_76619864_C_A	4	1052	52.3644	286	79.2244	1113	42.4	1.23501	1.8685
4_76620020_A_G	4_76620020_A_G	0	207	10.3036	8	2.21607	345	13.1429	0.783972	0.168614
4_76620020_A_G	4_76620020_A_G	1	0	0	0	0	0	0	#DIV/0!	#DIV/0!
4_76620020_A_G	4_76620020_A_G	2	459	22.8472	13	3.60111	1150	43.8095	0.521512	0.0821992
4_76620020_A_G	4_76620020_A_G	3	0	0	0	0	0	0	#DIV/0!	#DIV/0!
4_76620020_A_G	4_76620020_A_G	4	1343	66.8492	340	94.1828	1130	43.0476	1.55291	2.18788
4_76620020_A_G	4_76620356_C_T	0	160	7.96416	4	1.10803	345	13.1429	0.605969	0.0843069
4_76620020_A_G	4_76620356_C_T	1	49	2.43902	4	1.10803	1	0.0380952	64.0244	29.0859
4_76620020_A_G	4_76620356_C_T	2	466	23.1956	14	3.87812	1148	43.7333	0.530388	0.0886764
4_76620020_A_G	4_76620356_C_T	3	312	15.5301	57	15.7895	18	0.685714	22.6481	23.0263
4_76620020_A_G	4_76620356_C_T	4	1022	50.8711	282	78.1163	1113	42.4	1.19979	1.84237
4_76620020_A_G	4_76620358_G_A	0	160	7.96416	4	1.10803	345	13.1429	0.605969	0.0843069
4_76620020_A_G	4_76620358_G_A	1	49	2.43902	4	1.10803	1	0.0380952	64.0244	29.0859
4_76620020_A_G	4_76620358_G_A	2	465	23.1458	14	3.87812	1148	43.7333	0.529249	0.0886764
4_76620020_A_G	4_76620358_G_A	3	312	15.5301	57	15.7895	18	0.685714	22.6481	23.0263
4_76620020_A_G	4_76620358_G_A	4	1023	50.9209	282	78.1163	1113	42.4	1.20096	1.84237
4_76620020_A_G	4_76620513_A_C	0	159	7.91439	4	1.10803	345	13.1429	0.602181	0.0843069
4_76620020_A_G	4_76620513_A_C	1	49	2.43902	4	1.10803	2	0.0761905	32.0122	14.5429
4_76620020_A_G	4_76620513_A_C	2	462	22.9965	14	3.87812	1148	43.7333	0.525835	0.0886764
4_76620020_A_G	4_76620513_A_C	3	322	16.0279	57	15.7895	17	0.647619	24.7489	24.3808
4_76620020_A_G	4_76620513_A_C	4	1017	50.6222	282	78.1163	1113	42.4	1.19392	1.84237
4_76620020_A_G	4_76620936_C_CAGG	0	159	7.91439	4	1.10803	329	12.5333	0.631467	0.0884069
4_76620020_A_G	4_76620936_C_CAGG	1	53	2.63813	4	1.10803	18	0.685714	3.84727	1.61588
4_76620020_A_G	4_76620936_C_CAGG	2	450	22.3992	14	3.87812	1146	43.6571	0.513071	0.0888312
4_76620020_A_G	4_76620936_C_CAGG	3	332	16.5256	58	16.0665	19	0.72381	22.8315	22.1971
4_76620020_A_G	4_76620936_C_CAGG	4	1015	50.5226	281	77.8393	1113	42.4	1.19157	1.83583
4_76620020_A_G	4_76621536_C_A	0	159	7.91439	4	1.10803	344	13.1048	0.603932	0.084552
4_76620020_A_G	4_76621536_C_A	1	46	2.2897	3	0.831025	3	0.114286	20.0348	7.27147
4_76620020_A_G	4_76621536_C_A	2	458	22.7974	15	4.15512	1146	43.6571	0.522192	0.0951763
4_76620020_A_G	4_76621536_C_A	3	335	16.675	58	16.0665	19	0.72381	23.0378	22.1971
4_76620020_A_G	4_76621536_C_A	4	1011	50.3235	281	77.8393	1113	42.4	1.18688	1.83583
4_76620020_A_G	4_76623853_G_A	0	156	7.76506	4	1.10803	343	13.0667	0.594265	0.0847985
4_76620020_A_G	4_76623853_G_A	1	57	2.83723	4	1.10803	17	0.647619	4.38102	1.71093
4_76620020_A_G	4_76623853_G_A	2	451	22.449	13	3.60111	1135	43.2381	0.519194	0.0832855
4_76620020_A_G	4_76623853_G_A	3	356	17.7203	71	19.6676	36	1.37143	12.921	14.341
4_76620020_A_G	4_76623853_G_A	4	989	49.2285	269	74.5152	1094	41.6762	1.18121	1.78796
4_76620020_A_G	4_76626789_C_A	0	127	6.32155	4	1.10803	312	11.8857	0.531861	0.093224
4_76620020_A_G	4_76626789_C_A	1	84	4.18118	4	1.10803	45	1.71429	2.43902	0.646353
4_76620020_A_G	4_76626789_C_A	2	432	21.5032	15	4.15512	1088	41.4476	0.518805	0.10025
4_76620020_A_G	4_76626789_C_A	3	346	17.2225	57	15.7895	93	3.54286	4.86119	4.45671
4_76620020_A_G	4_76626789_C_A	4	1020	50.7715	281	77.8393	1087	41.4095	1.22608	1.87974
4_76620020_A_G	4_76630255_G_A	0	128	6.37133	4	1.10803	312	11.8857	0.536049	0.093224
4_76620020_A_G	4_76630255_G_A	1	85	4.23096	4	1.10803	44	1.67619	2.52415	0.661043
4_76620020_A_G	4_76630255_G_A	2	424	21.105	15	4.15512	1088	41.4476	0.509198	0.10025
4_76620020_A_G	4_76630255_G_A	3	358	17.8198	56	15.5125	89	3.39048	5.25584	4.57531
4_76620020_A_G	4_76630255_G_A	4	1014	50.4729	282	78.1163	1092	41.6	1.21329	1.8778
4_76620020_A_G	4_76637624_C_T	0	178	8.86013	5	1.38504	343	13.0667	0.678071	0.105998
4_76620020_A_G	4_76637624_C_T	1	203	10.1045	8	2.21607	484	18.4381	0.548025	0.12019
4_76620020_A_G	4_76637624_C_T	2	559	27.8248	27	7.47922	856	32.6095	0.853272	0.229357
4_76620020_A_G	4_76637624_C_T	3	657	32.7028	130	36.0111	546	20.8	1.57225	1.7313
4_76620020_A_G	4_76637624_C_T	4	412	20.5077	191	52.9086	396	15.0857	1.35941	3.5072
4_76620020_A_G	4_76641385_T_A	0	178	8.86013	5	1.38504	339	12.9143	0.686072	0.107249
4_76620020_A_G	4_76641385_T_A	1	207	10.3036	9	2.49307	492	18.7429	0.549737	0.133015
4_76620020_A_G	4_76641385_T_A	2	554	27.5759	27	7.47922	846	32.2286	0.855635	0.232068
4_76620020_A_G	4_76641385_T_A	3	666	33.1508	128	35.4571	555	21.1429	1.56794	1.67702
4_76620020_A_G	4_76641385_T_A	4	404	20.1095	192	53.1856	393	14.9714	1.34319	3.55247
4_76620020_A_G	4_76641805_T_C	0	177	8.81035	5	1.38504	339	12.9143	0.682218	0.107249
4_76620020_A_G	4_76641805_T_C	1	208	10.3534	8	2.21607	492	18.7429	0.552392	0.118235
4_76620020_A_G	4_76641805_T_C	2	558	27.775	26	7.20222	846	32.2286	0.861813	0.223473
4_76620020_A_G	4_76641805_T_C	3	671	33.3997	134	37.1191	555	21.1429	1.57972	1.75563
4_76620020_A_G	4_76641805_T_C	4	395	19.6615	188	52.0776	393	14.9714	1.31327	3.47846
4_76620020_A_G	4_76643316_T_G	0	176	8.76058	5	1.38504	339	12.9143	0.678363	0.107249
4_76620020_A_G	4_76643316_T_G	1	213	10.6023	9	2.49307	492	18.7429	0.565671	0.133015
4_76620020_A_G	4_76643316_T_G	2	551	27.4266	26	7.20222	846	32.2286	0.851002	0.223473
4_76620020_A_G	4_76643316_T_G	3	652	32.454	132	36.5651	555	21.1429	1.53498	1.72943
4_76620020_A_G	4_76643316_T_G	4	417	20.7566	189	52.3546	393	14.9714	1.38641	3.49697
4_76620020_A_G	4_76655249_A_G	0	114	5.67446	4	1.10803	282	10.7429	0.528208	0.103141
4_76620020_A_G	4_76655249_A_G	1	94	4.67894	4	1.10803	81	3.08571	1.51632	0.359085
4_76620020_A_G	4_76655249_A_G	2	411	20.4579	14	3.87812	1021	38.8952	0.525975	0.0997067
4_76620020_A_G	4_76655249_A_G	3	374	18.6162	62	17.1745	170	6.47619	2.87456	2.65195
4_76620020_A_G	4_76655249_A_G	4	1016	50.5724	277	76.7313	1071	40.8	1.23952	1.88067
4_76620020_A_G	4_76658004_G_C	0	115	5.72424	4	1.10803	280	10.6667	0.536648	0.103878
4_76620020_A_G	4_76658004_G_C	1	95	4.72872	4	1.10803	84	3.2	1.47773	0.34626
4_76620020_A_G	4_76658004_G_C	2	417	20.7566	13	3.60111	1018	38.781	0.535227	0.0928576
4_76620020_A_G	4_76658004_G_C	3	371	18.4669	68	18.8366	173	6.59048	2.80206	2.85815
4_76620020_A_G	4_76658004_G_C	4	1011	50.3235	272	75.3463	1070	40.7619	1.23457	1.84845
4_76620020_A_G	4_76662838_C_T	0	148	7.36685	5	1.38504	306	11.6571	0.63196	0.118815
4_76620020_A_G	4_76662838_C_T	1	115	5.72424	6	1.66205	160	6.09524	0.939133	0.27268
4_76620020_A_G	4_76662838_C_T	2	417	20.7566	27	7.47922	976	37.181	0.558259	0.201157
4_76620020_A_G	4_76662838_C_T	3	475	23.6436	102	28.2548	305	11.619	2.0349	2.43177
4_76620020_A_G	4_76662838_C_T	4	854	42.5087	221	61.2188	878	33.4476	1.2709	1.83029
4_76620020_A_G	4_76663889_C_G	0	115	5.72424	4	1.10803	279	10.6286	0.538571	0.10425
4_76620020_A_G	4_76663889_C_G	1	90	4.47984	4	1.10803	84	3.2	1.39995	0.34626
4_76620020_A_G	4_76663889_C_G	2	421	20.9557	14	3.87812	1018	38.781	0.540361	0.100001
4_76620020_A_G	4_76663889_C_G	3	364	18.1185	64	17.7285	176	6.70476	2.70233	2.64417
4_76620020_A_G	4_76663889_C_G	4	1019	50.7218	275	76.1773	1068	40.6857	1.24667	1.87233
4_76620020_A_G	4_76675042_A_C	0	106	5.27626	3	0.831025	254	9.67619	0.545282	0.0858835
4_76620020_A_G	4_76675042_A_C	1	93	4.62917	3	0.831025	102	3.88571	1.19133	0.213867
4_76620020_A_G	4_76675042_A_C	2	407	20.2588	15	4.15512	984	37.4857	0.540441	0.110846
4_76620020_A_G	4_76675042_A_C	3	363	18.0687	64	17.7285	207	7.88571	2.29132	2.24818
4_76620020_A_G	4_76675042_A_C	4	1040	51.767	276	76.4543	1078	41.0667	1.26056	1.86171
4_76620020_A_G	4_76704726_C_T	0	147	7.31707	5	1.38504	255	9.71429	0.753228	0.142578
4_76620020_A_G	4_76704726_C_T	1	234	11.6476	7	1.93906	580	22.0952	0.527154	0.0877591
4_76620020_A_G	4_76704726_C_T	2	600	29.8656	43	11.9114	880	33.5238	0.890877	0.35531
4_76620020_A_G	4_76704726_C_T	3	681	33.8975	145	40.1662	619	23.581	1.43749	1.70333
4_76620020_A_G	4_76704726_C_T	4	347	17.2723	161	44.5983	291	11.0857	1.55807	4.02305
4_76620020_A_G	4_76714751_T_C	0	136	6.76954	5	1.38504	247	9.40952	0.719435	0.147196
4_76620020_A_G	4_76714751_T_C	1	203	10.1045	7	1.93906	497	18.9333	0.53369	0.102415
4_76620020_A_G	4_76714751_T_C	2	547	27.2275	42	11.6343	865	32.9524	0.826267	0.353066
4_76620020_A_G	4_76714751_T_C	3	670	33.3499	128	35.4571	628	23.9238	1.39401	1.48208
4_76620020_A_G	4_76714751_T_C	4	453	22.5485	179	49.5845	388	14.781	1.52551	3.35462
4_76620020_A_G	4_76716349_A_C	0	143	7.11797	4	1.10803	251	9.5619	0.744409	0.11588
4_76620020_A_G	4_76716349_A_C	1	215	10.7018	8	2.21607	558	21.2571	0.503447	0.10425
4_76620020_A_G	4_76716349_A_C	2	583	29.0194	42	11.6343	859	32.7238	0.886798	0.355532
4_76620020_A_G	4_76716349_A_C	3	683	33.997	141	39.0582	633	24.1143	1.40983	1.61971
4_76620020_A_G	4_76716349_A_C	4	385	19.1638	166	45.9834	324	12.3429	1.55262	3.72551
4_76620020_A_G	4_76716860_T_C	0	144	7.16775	5	1.38504	251	9.5619	0.749615	0.14485
4_76620020_A_G	4_76716860_T_C	1	216	10.7516	7	1.93906	559	21.2952	0.504884	0.091056
4_76620020_A_G	4_76716860_T_C	2	577	28.7208	43	11.9114	858	32.6857	0.878694	0.364421
4_76620020_A_G	4_76716860_T_C	3	682	33.9472	139	38.5042	633	24.1143	1.40776	1.59674
4_76620020_A_G	4_76716860_T_C	4	390	19.4126	167	46.2604	324	12.3429	1.57278	3.74795
4_76620020_A_G	4_76724299_G_A	0	3	0.149328	0	0	7	0.266667	0.55998	0
4_76620020_A_G	4_76724299_G_A	1	53	2.63813	0	0	152	5.79048	0.455598	0
4_76620020_A_G	4_76724299_G_A	2	355	17.6705	8	2.21607	736	28.0381	0.630231	0.0790377
4_76620020_A_G	4_76724299_G_A	3	759	37.78	35	9.69529	1167	44.4571	0.849807	0.218082
4_76620020_A_G	4_76724299_G_A	4	839	41.7621	318	88.0886	563	21.4476	1.94717	4.10715
4_76620020_A_G	4_76726132_T_A	0	3	0.149328	0	0	8	0.304762	0.489983	0
4_76620020_A_G	4_76726132_T_A	1	57	2.83723	0	0	166	6.32381	0.448659	0
4_76620020_A_G	4_76726132_T_A	2	392	19.5122	8	2.21607	778	29.6381	0.658348	0.0747709
4_76620020_A_G	4_76726132_T_A	3	775	38.5764	43	11.9114	1159	44.1524	0.873711	0.269778
4_76620020_A_G	4_76726132_T_A	4	782	38.9248	310	85.8726	514	19.581	1.98789	4.38552
4_76620020_A_G	4_76726437_T_C	0	4	0.199104	0	0	8	0.304762	0.65331	0
4_76620020_A_G	4_76726437_T_C	1	49	2.43902	0	0	166	6.32381	0.385689	0
4_76620020_A_G	4_76726437_T_C	2	378	18.8153	8	2.21607	778	29.6381	0.634836	0.0747709
4_76620020_A_G	4_76726437_T_C	3	673	33.4993	24	6.6482	1159	44.1524	0.758719	0.150574
4_76620020_A_G	4_76726437_T_C	4	905	45.0473	329	91.1357	514	19.581	2.30057	4.65431
4_76620020_A_G	4_76726629_A_G	0	5	0.24888	0	0	8	0.304762	0.816638	0
4_76620020_A_G	4_76726629_A_G	1	51	2.53858	0	0	165	6.28571	0.403864	0
4_76620020_A_G	4_76726629_A_G	2	367	18.2678	9	2.49307	779	29.6762	0.615571	0.0840093
4_76620020_A_G	4_76726629_A_G	3	667	33.2006	23	6.37119	1159	44.1524	0.751955	0.1443
4_76620020_A_G	4_76726629_A_G	4	919	45.7442	329	91.1357	514	19.581	2.33616	4.65431
4_76620020_A_G	4_76726690_A_C	0	4	0.199104	0	0	8	0.304762	0.65331	0
4_76620020_A_G	4_76726690_A_C	1	53	2.63813	0	0	166	6.32381	0.417174	0
4_76620020_A_G	4_76726690_A_C	2	371	18.4669	8	2.21607	778	29.6381	0.62308	0.0747709
4_76620020_A_G	4_76726690_A_C	3	725	36.0876	33	9.14127	1158	44.1143	0.818048	0.207218
4_76620020_A_G	4_76726690_A_C	4	856	42.6083	320	88.6427	515	19.619	2.17178	4.51819
4_76620020_A_G	4_76734771_A_G	0	4	0.199104	0	0	8	0.304762	0.65331	0
4_76620020_A_G	4_76734771_A_G	1	57	2.83723	0	0	167	6.3619	0.445972	0
4_76620020_A_G	4_76734771_A_G	2	385	19.1638	8	2.21607	777	29.6	0.647424	0.0748671
4_76620020_A_G	4_76734771_A_G	3	771	38.3773	42	11.6343	1157	44.0762	0.870704	0.26396
4_76620020_A_G	4_76734771_A_G	4	792	39.4226	311	86.1496	516	19.6571	2.00551	4.38261
4_76620020_A_G	4_76736806_C_CAG	0	3	0.149328	0	0	8	0.304762	0.489983	0
4_76620020_A_G	4_76736806_C_CAG	1	60	2.98656	0	0	160	6.09524	0.489983	0
4_76620020_A_G	4_76736806_C_CAG	2	383	19.0642	8	2.21607	782	29.7905	0.639943	0.0743884
4_76620020_A_G	4_76736806_C_CAG	3	784	39.0244	43	11.9114	1159	44.1524	0.883857	0.269778
4_76620020_A_G	4_76736806_C_CAG	4	779	38.7755	310	85.8726	516	19.6571	1.97259	4.36852
4_76620020_A_G	4_76737660_G_GT	0	2	0.099552	0	0	8	0.304762	0.326655	0
4_76620020_A_G	4_76737660_G_GT	1	56	2.78746	0	0	161	6.13333	0.454477	0
4_76620020_A_G	4_76737660_G_GT	2	377	18.7656	8	2.21607	774	29.4857	0.636429	0.0751573
4_76620020_A_G	4_76737660_G_GT	3	753	37.4813	40	11.0803	1163	44.3048	0.845989	0.250093
4_76620020_A_G	4_76737660_G_GT	4	821	40.8661	313	86.7036	519	19.7714	2.06693	4.3853
4_76620020_A_G	4_76737926_G_GTGCCA	0	3	0.149328	0	0	8	0.304762	0.489983	0
4_76620020_A_G	4_76737926_G_GTGCCA	1	60	2.98656	0	0	166	6.32381	0.472272	0
4_76620020_A_G	4_76737926_G_GTGCCA	2	385	19.1638	8	2.21607	778	29.6381	0.646592	0.0747709
4_76620020_A_G	4_76737926_G_GTGCCA	3	772	38.4271	42	11.6343	1157	44.0762	0.871833	0.26396
4_76620020_A_G	4_76737926_G_GTGCCA	4	789	39.2733	311	86.1496	516	19.6571	1.99791	4.38261
4_76620020_A_G	4_76737937_T_C	0	2	0.099552	0	0	8	0.304762	0.326655	0
4_76620020_A_G	4_76737937_T_C	1	57	2.83723	0	0	163	6.20952	0.456916	0
4_76620020_A_G	4_76737937_T_C	2	382	19.0144	9	2.49307	774	29.4857	0.644869	0.084552
4_76620020_A_G	4_76737937_T_C	3	766	38.1284	41	11.3573	1161	44.2286	0.862077	0.256787
4_76620020_A_G	4_76737937_T_C	4	802	39.9204	311	86.1496	519	19.7714	2.01909	4.35728
4_76620020_A_G	4_76739009_G_C	0	131	6.52066	4	1.10803	240	9.14286	0.713197	0.121191
4_76620020_A_G	4_76739009_G_C	1	238	11.8467	8	2.21607	590	22.4762	0.527077	0.0985962
4_76620020_A_G	4_76739009_G_C	2	584	29.0692	40	11.0803	862	32.8381	0.885228	0.337423
4_76620020_A_G	4_76739009_G_C	3	698	34.7437	139	38.5042	635	24.1905	1.43625	1.59171
4_76620020_A_G	4_76739009_G_C	4	358	17.8198	170	47.0914	298	11.3524	1.5697	4.14815
4_76620020_A_G	4_76739578_C_G	0	3	0.149328	0	0	7	0.266667	0.55998	0
4_76620020_A_G	4_76739578_C_G	1	60	2.98656	0	0	163	6.20952	0.480964	0
4_76620020_A_G	4_76739578_C_G	2	379	18.8651	9	2.49307	775	29.5238	0.638979	0.0844429
4_76620020_A_G	4_76739578_C_G	3	788	39.2235	43	11.9114	1161	44.2286	0.886836	0.269314
4_76620020_A_G	4_76739578_C_G	4	779	38.7755	309	85.5956	519	19.7714	1.96119	4.32926
4_76620020_A_G	4_76741095_G_A	0	3	0.149328	0	0	7	0.266667	0.55998	0
4_76620020_A_G	4_76741095_G_A	1	50	2.4888	0	0	155	5.90476	0.42149	0
4_76620020_A_G	4_76741095_G_A	2	372	18.5167	11	3.04709	782	29.7905	0.621564	0.102284
4_76620020_A_G	4_76741095_G_A	3	731	36.3863	37	10.2493	1161	44.2286	0.822687	0.231735
4_76620020_A_G	4_76741095_G_A	4	853	42.4589	313	86.7036	520	19.8095	2.14336	4.37686
4_76620020_A_G	4_76741156_C_T	0	3	0.149328	0	0	7	0.266667	0.55998	0
4_76620020_A_G	4_76741156_C_T	1	47	2.33947	0	0	154	5.86667	0.398774	0
4_76620020_A_G	4_76741156_C_T	2	390	19.4126	8	2.21607	780	29.7143	0.65331	0.0745792
4_76620020_A_G	4_76741156_C_T	3	728	36.2369	41	11.3573	1162	44.2667	0.818605	0.256566
4_76620020_A_G	4_76741156_C_T	4	841	41.8616	312	86.4266	522	19.8857	2.10511	4.34616
4_76620020_A_G	4_76750211_T_A	0	131	6.52066	4	1.10803	242	9.21905	0.707303	0.12019
4_76620020_A_G	4_76750211_T_A	1	241	11.996	9	2.49307	592	22.5524	0.531918	0.110546
4_76620020_A_G	4_76750211_T_A	2	590	29.3678	44	12.1884	857	32.6476	0.89954	0.373331
4_76620020_A_G	4_76750211_T_A	3	681	33.8975	131	36.2881	640	24.381	1.39033	1.48838
4_76620020_A_G	4_76750211_T_A	4	366	18.218	173	47.9224	294	11.2	1.62661	4.27879
4_76620020_A_G	4_76789079_C_CA	0	5	0.24888	0	0	7	0.266667	0.9333	0
4_76620020_A_G	4_76789079_C_CA	1	55	2.73768	0	0	145	5.52381	0.495615	0
4_76620020_A_G	4_76789079_C_CA	2	357	17.77	12	3.3241	694	26.4381	0.672137	0.125731
4_76620020_A_G	4_76789079_C_CA	3	657	32.7028	35	9.69529	1176	44.8	0.729974	0.216413
4_76620020_A_G	4_76789079_C_CA	4	935	46.5406	314	86.9806	603	22.9714	2.02602	3.78647
4_76620020_A_G	4_76813630_GCAT_G	0	48	2.38925	0	0	120	4.57143	0.522648	0
4_76620020_A_G	4_76813630_GCAT_G	1	191	9.50722	5	1.38504	535	20.381	0.466476	0.0679576
4_76620020_A_G	4_76813630_GCAT_G	2	590	29.3678	41	11.3573	918	34.9714	0.839767	0.324761
4_76620020_A_G	4_76813630_GCAT_G	3	787	39.1737	160	44.3213	807	30.7429	1.27424	1.44168
4_76620020_A_G	4_76813630_GCAT_G	4	393	19.562	155	42.9363	245	9.33333	2.09593	4.60032
4_76620020_A_G	4_76814253_G_T	0	47	2.33947	0	0	121	4.60952	0.50753	0
4_76620020_A_G	4_76814253_G_T	1	192	9.55699	5	1.38504	534	20.3429	0.469796	0.0680849
4_76620020_A_G	4_76814253_G_T	2	591	29.4176	41	11.3573	915	34.8571	0.843948	0.325825
4_76620020_A_G	4_76814253_G_T	3	804	40.0199	161	44.5983	806	30.7048	1.30338	1.45249
4_76620020_A_G	4_76814253_G_T	4	375	18.666	154	42.6593	249	9.48571	1.9678	4.49721

## Sheet: Figure3D-E
Figure 3D-E. Risk allele combinations with rs344131 in CFM patients and healthy controls.
SNP_A	SNP_B	Numbe of risk allele	Count of combination in CFM	Ratio of combination in CFM	Count of combination in 361 CFM	Ratio of combination in 361 CFM	Count of combination in Healthy	Ratio of combination in Healthy	Ratio of risk allele proportion (CFM vs Healthy controls)	Ratio of risk allele proportion (361 CFM vs Healthy controls)
rs344131	4_76544608_T_G	0	1	0.049776	0	0	1	0.0380952	1.30662	0
rs344131	4_76544608_T_G	1	11	0.547536	0	0	39	1.48571	0.368534	0
rs344131	4_76544608_T_G	2	151	7.51618	1	0.277008	312	11.8857	0.632371	0.023306
rs344131	4_76544608_T_G	3	488	24.2907	11	3.04709	1009	38.4381	0.631943	0.0792727
rs344131	4_76544608_T_G	4	1358	67.5958	349	96.6759	1264	48.1524	1.40379	2.00771
rs344131	4_76547441_C_A	0	33	1.64261	1	0.277008	36	1.37143	1.19774	0.201985
rs344131	4_76547441_C_A	1	215	10.7018	6	1.66205	366	13.9429	0.76755	0.119204
rs344131	4_76547441_C_A	2	822	40.9159	253	70.0831	1037	39.5048	1.03572	1.77404
rs344131	4_76547441_C_A	3	721	35.8885	83	22.9917	909	34.6286	1.03638	0.663951
rs344131	4_76547441_C_A	4	218	10.8512	18	4.98615	277	10.5524	1.02831	0.472514
rs344131	4_76548753_G_A	0	39	1.94126	0	0	87	3.31429	0.585726	0
rs344131	4_76548753_G_A	1	193	9.60677	1	0.277008	456	17.3714	0.553021	0.0159462
rs344131	4_76548753_G_A	2	593	29.5172	34	9.41828	923	35.1619	0.839465	0.267855
rs344131	4_76548753_G_A	3	823	40.9657	133	36.8421	865	32.9524	1.24318	1.11804
rs344131	4_76548753_G_A	4	361	17.9691	193	53.4626	294	11.2	1.60439	4.77345
rs344131	4_76549147_G_A	0	31	1.54306	0	0	66	2.51429	0.613716	0
rs344131	4_76549147_G_A	1	143	7.11797	1	0.277008	337	12.8381	0.554441	0.0215771
rs344131	4_76549147_G_A	2	438	21.8019	20	5.54017	791	30.1333	0.723514	0.183855
rs344131	4_76549147_G_A	3	792	39.4226	73	20.2216	961	36.6095	1.07684	0.552359
rs344131	4_76549147_G_A	4	605	30.1145	267	73.9612	470	17.9048	1.68193	4.13081
rs344131	4_76549429_A_C	0	38	1.89149	0	0	88	3.35238	0.564222	0
rs344131	4_76549429_A_C	1	193	9.60677	1	0.277008	454	17.2952	0.555457	0.0160165
rs344131	4_76549429_A_C	2	600	29.8656	35	9.69529	913	34.781	0.858677	0.278753
rs344131	4_76549429_A_C	3	776	38.6262	116	32.133	871	33.181	1.16411	0.968416
rs344131	4_76549429_A_C	4	402	20.01	209	57.8947	299	11.3905	1.75673	5.08273
rs344131	4_76549437_T_C	0	30	1.49328	0	0	66	2.51429	0.593918	0
rs344131	4_76549437_T_C	1	135	6.71976	1	0.277008	335	12.7619	0.526548	0.0217059
rs344131	4_76549437_T_C	2	445	22.1503	18	4.98615	788	30.019	0.737876	0.1661
rs344131	4_76549437_T_C	3	781	38.8751	72	19.9446	964	36.7238	1.05858	0.543097
rs344131	4_76549437_T_C	4	618	30.7616	270	74.7922	472	17.981	1.71079	4.15953
rs344131	4_76549615_C_T	0	38	1.89149	1	0.277008	33	1.25714	1.50459	0.220348
rs344131	4_76549615_C_T	1	217	10.8014	7	1.93906	379	14.4381	0.748118	0.134302
rs344131	4_76549615_C_T	2	805	40.0697	259	71.7452	1032	39.3143	1.01921	1.82491
rs344131	4_76549615_C_T	3	726	36.1374	72	19.9446	917	34.9333	1.03447	0.570933
rs344131	4_76549615_C_T	4	223	11.1	22	6.09418	264	10.0571	1.1037	0.605956
rs344131	4_76549963_T_C	0	37	1.84171	0	0	88	3.35238	0.549374	0
rs344131	4_76549963_T_C	1	194	9.65655	1	0.277008	454	17.2952	0.558336	0.0160165
rs344131	4_76549963_T_C	2	596	29.6665	32	8.86427	916	34.8952	0.850159	0.254025
rs344131	4_76549963_T_C	3	813	40.4679	134	37.1191	870	33.1429	1.22101	1.11997
rs344131	4_76549963_T_C	4	369	18.3673	194	53.7396	297	11.3143	1.62338	4.74971
rs344131	4_76550486_A_G	0	30	1.49328	0	0	65	2.47619	0.603055	0
rs344131	4_76550486_A_G	1	140	6.96864	1	0.277008	335	12.7619	0.54605	0.0217059
rs344131	4_76550486_A_G	2	437	21.7521	17	4.70914	789	30.0571	0.723692	0.156673
rs344131	4_76550486_A_G	3	817	40.667	83	22.9917	964	36.7238	1.10737	0.62607
rs344131	4_76550486_A_G	4	585	29.119	260	72.0222	472	17.981	1.61943	4.00547
rs344131	4_76550765_G_A	0	31	1.54306	0	0	65	2.47619	0.623157	0
rs344131	4_76550765_G_A	1	136	6.76954	1	0.277008	335	12.7619	0.530449	0.0217059
rs344131	4_76550765_G_A	2	436	21.7023	17	4.70914	789	30.0571	0.722036	0.156673
rs344131	4_76550765_G_A	3	817	40.667	81	22.4377	964	36.7238	1.10737	0.610984
rs344131	4_76550765_G_A	4	589	29.3181	262	72.5762	472	17.981	1.63051	4.03628
rs344131	4_76550879_A_G	0	33	1.64261	0	0	65	2.47619	0.663361	0
rs344131	4_76550879_A_G	1	135	6.71976	1	0.277008	334	12.7238	0.528125	0.0217709
rs344131	4_76550879_A_G	2	439	21.8517	19	5.26316	790	30.0952	0.726084	0.174883
rs344131	4_76550879_A_G	3	793	39.4724	78	21.6066	966	36.8	1.07262	0.587137
rs344131	4_76550879_A_G	4	609	30.3136	263	72.8532	470	17.9048	1.69305	4.06893
rs344131	4_76551024_G_A	0	30	1.49328	0	0	65	2.47619	0.603055	0
rs344131	4_76551024_G_A	1	139	6.91887	1	0.277008	334	12.7238	0.543773	0.0217709
rs344131	4_76551024_G_A	2	425	21.1548	17	4.70914	789	30.0571	0.70382	0.156673
rs344131	4_76551024_G_A	3	803	39.9701	79	21.8837	965	36.7619	1.08727	0.595281
rs344131	4_76551024_G_A	4	612	30.4629	264	73.1302	472	17.981	1.69418	4.06709
rs344131	4_76551518_C_T	0	1	0.049776	0	0	2	0.0761905	0.65331	0
rs344131	4_76551518_C_T	1	8	0.398208	0	0	44	1.67619	0.237567	0
rs344131	4_76551518_C_T	2	164	8.16327	2	0.554017	303	11.5429	0.707214	0.0479965
rs344131	4_76551518_C_T	3	497	24.7387	11	3.04709	994	37.8667	0.65331	0.080469
rs344131	4_76551518_C_T	4	1339	66.6501	348	96.3989	1282	48.8381	1.36471	1.97385
rs344131	4_76553207_G_C	0	0	0	0	0	2	0.0761905	0	0
rs344131	4_76553207_G_C	1	11	0.547536	0	0	61	2.32381	0.23562	0
rs344131	4_76553207_G_C	2	166	8.26282	2	0.554017	315	12	0.688568	0.0461681
rs344131	4_76553207_G_C	3	498	24.7885	11	3.04709	968	36.8762	0.672208	0.0826303
rs344131	4_76553207_G_C	4	1334	66.4012	348	96.3989	1279	48.7238	1.36281	1.97848
rs344131	4_76569817_A_G	0	14	0.696864	0	0	38	1.44762	0.481386	0
rs344131	4_76569817_A_G	1	93	4.62917	0	0	255	9.71429	0.476532	0
rs344131	4_76569817_A_G	2	404	20.1095	8	2.21607	769	29.2952	0.686443	0.075646
rs344131	4_76569817_A_G	3	807	40.1692	66	18.2825	1025	39.0476	1.02872	0.468212
rs344131	4_76569817_A_G	4	691	34.3952	287	79.5014	538	20.4952	1.67821	3.87902
rs344131	4_76571002_T_G	0	85	4.23096	0	0	144	5.48571	0.771269	0
rs344131	4_76571002_T_G	1	258	12.8422	3	0.831025	582	22.1714	0.579223	0.0374818
rs344131	4_76571002_T_G	2	705	35.0921	78	21.6066	971	36.9905	0.948679	0.584114
rs344131	4_76571002_T_G	3	692	34.445	150	41.5512	720	27.4286	1.25581	1.51489
rs344131	4_76571002_T_G	4	269	13.3897	130	36.0111	208	7.92381	1.68981	4.54467
rs344131	4_76573468_T_C	0	12	0.597312	0	0	17	0.647619	0.92232	0
rs344131	4_76573468_T_C	1	68	3.38477	0	0	165	6.28571	0.538486	0
rs344131	4_76573468_T_C	2	358	17.8198	9	2.49307	719	27.3905	0.650584	0.0910198
rs344131	4_76573468_T_C	3	738	36.7347	53	14.6814	1117	42.5524	0.863282	0.34502
rs344131	4_76573468_T_C	4	833	41.4634	299	82.8255	607	23.1238	1.7931	3.58183
rs344131	4_76574418_A_G	0	0	0	0	0	2	0.0761905	0	0
rs344131	4_76574418_A_G	1	10	0.49776	0	0	64	2.4381	0.204159	0
rs344131	4_76574418_A_G	2	167	8.31259	2	0.554017	318	12.1143	0.686181	0.0457325
rs344131	4_76574418_A_G	3	514	25.5849	13	3.60111	942	35.8857	0.712954	0.100349
rs344131	4_76574418_A_G	4	1318	65.6048	346	95.8449	1299	49.4857	1.32573	1.93682
rs344131	4_76577083_T_C	0	0	0	0	0	2	0.0761905	0	0
rs344131	4_76577083_T_C	1	9	0.447984	0	0	63	2.4	0.18666	0
rs344131	4_76577083_T_C	2	168	8.36237	2	0.554017	319	12.1524	0.688126	0.0455891
rs344131	4_76577083_T_C	3	509	25.336	12	3.3241	942	35.8857	0.706019	0.0926302
rs344131	4_76577083_T_C	4	1323	65.8537	347	96.1219	1299	49.4857	1.33076	1.94242
rs344131	4_76579643_A_G	0	58	2.88701	1	0.277008	23	0.87619	0.688945	0.316151
rs344131	4_76579643_A_G	1	179	8.90991	3	0.831025	227	8.64762	0.58036	0.0960987
rs344131	4_76579643_A_G	2	511	25.4355	230	63.7119	1022	38.9333	0.774574	1.63644
rs344131	4_76579643_A_G	3	756	37.6307	110	30.4709	1022	38.9333	1.16762	0.782643
rs344131	4_76579643_A_G	4	505	25.1369	17	4.70914	331	12.6095	1.63328	0.373459
rs344131	4_76579794_A_G	0	5	0.24888	0	0	9	0.342857	0.7259	0
rs344131	4_76579794_A_G	1	51	2.53858	0	0	140	5.33333	0.475983	0
rs344131	4_76579794_A_G	2	342	17.0234	5	1.38504	698	26.5905	0.640206	0.0520879
rs344131	4_76579794_A_G	3	839	41.7621	66	18.2825	1171	44.6095	0.936169	0.409835
rs344131	4_76579794_A_G	4	772	38.4271	290	80.3324	607	23.1238	1.6618	3.47401
rs344131	4_76581967_T_G	0	9	0.447984	0	0	26	0.990476	0.452292	0
rs344131	4_76581967_T_G	1	67	3.33499	0	0	230	8.7619	0.380624	0
rs344131	4_76581967_T_G	2	412	20.5077	6	1.66205	755	28.7619	0.713017	0.0577865
rs344131	4_76581967_T_G	3	830	41.3141	68	18.8366	1082	41.219	1.00231	0.456987
rs344131	4_76581967_T_G	4	691	34.3952	287	79.5014	532	20.2667	1.69713	3.92277
rs344131	4_76582192_T_TAGAAA	0	9	0.447984	0	0	26	0.990476	0.452292	0
rs344131	4_76582192_T_TAGAAA	1	67	3.33499	0	0	228	8.68571	0.383963	0
rs344131	4_76582192_T_TAGAAA	2	412	20.5077	6	1.66205	756	28.8	0.712073	0.0577101
rs344131	4_76582192_T_TAGAAA	3	829	41.2643	67	18.5596	1083	41.2571	1.00017	0.449851
rs344131	4_76582192_T_TAGAAA	4	692	34.445	288	79.7784	532	20.2667	1.69959	3.93643
rs344131	4_76583247_T_C	0	18	0.895968	0	0	43	1.6381	0.546957	0
rs344131	4_76583247_T_C	1	118	5.87357	0	0	311	11.8476	0.495759	0
rs344131	4_76583247_T_C	2	529	26.3315	18	4.98615	879	33.4857	0.786351	0.148904
rs344131	4_76583247_T_C	3	825	41.0652	109	30.1939	995	37.9048	1.08338	0.796573
rs344131	4_76583247_T_C	4	519	25.8337	234	64.8199	397	15.1238	1.70815	4.28595
rs344131	4_76583499_C_T	0	9	0.447984	0	0	26	0.990476	0.452292	0
rs344131	4_76583499_C_T	1	66	3.28522	0	0	229	8.72381	0.37658	0
rs344131	4_76583499_C_T	2	419	20.8561	5	1.38504	757	28.8381	0.723215	0.0480282
rs344131	4_76583499_C_T	3	831	41.3639	73	20.2216	1079	41.1048	1.0063	0.491953
rs344131	4_76583499_C_T	4	684	34.0468	283	78.3934	534	20.3429	1.67365	3.85361
rs344131	4_76583914_G_A	0	9	0.447984	0	0	26	0.990476	0.452292	0
rs344131	4_76583914_G_A	1	66	3.28522	0	0	229	8.72381	0.37658	0
rs344131	4_76583914_G_A	2	427	21.2544	6	1.66205	756	28.8	0.737998	0.0577101
rs344131	4_76583914_G_A	3	818	40.7168	67	18.5596	1080	41.1429	0.989644	0.4511
rs344131	4_76583914_G_A	4	689	34.2957	288	79.7784	534	20.3429	1.68588	3.92169
rs344131	4_76584194_T_C	0	15	0.74664	0	0	43	1.6381	0.455798	0
rs344131	4_76584194_T_C	1	113	5.62469	0	0	311	11.8476	0.474753	0
rs344131	4_76584194_T_C	2	525	26.1324	19	5.26316	881	33.5619	0.778633	0.156819
rs344131	4_76584194_T_C	3	754	37.5311	91	25.2078	997	37.981	0.988156	0.663695
rs344131	4_76584194_T_C	4	602	29.9652	251	69.5291	393	14.9714	2.00149	4.64412
rs344131	4_76586291_T_C	0	4	0.199104	0	0	7	0.266667	0.74664	0
rs344131	4_76586291_T_C	1	59	2.93678	0	0	137	5.21905	0.562705	0
rs344131	4_76586291_T_C	2	341	16.9736	6	1.66205	702	26.7429	0.634697	0.0621493
rs344131	4_76586291_T_C	3	819	40.7666	65	18.0055	1174	44.7238	0.911518	0.402594
rs344131	4_76586291_T_C	4	786	39.1239	290	80.3324	605	23.0476	1.69753	3.4855
rs344131	4_76589357_A_C	0	77	3.83275	0	0	90	3.42857	1.11789	0
rs344131	4_76589357_A_C	1	213	10.6023	1	0.277008	443	16.8762	0.62824	0.0164141
rs344131	4_76589357_A_C	2	560	27.8746	44	12.1884	921	35.0857	0.79447	0.347388
rs344131	4_76589357_A_C	3	673	33.4993	135	37.3961	845	32.1905	1.04066	1.16171
rs344131	4_76589357_A_C	4	486	24.1911	181	50.1385	326	12.419	1.94791	4.03723
rs344131	4_76589448_T_A	0	77	3.83275	0	0	90	3.42857	1.11789	0
rs344131	4_76589448_T_A	1	213	10.6023	1	0.277008	443	16.8762	0.62824	0.0164141
rs344131	4_76589448_T_A	2	571	28.4221	51	14.1274	922	35.1238	0.809198	0.402218
rs344131	4_76589448_T_A	3	586	29.1687	107	29.6399	844	32.1524	0.907203	0.921857
rs344131	4_76589448_T_A	4	562	27.9741	202	55.9557	326	12.419	2.25252	4.50563
rs344131	4_76598951_T_C	0	5	0.24888	0	0	7	0.266667	0.9333	0
rs344131	4_76598951_T_C	1	48	2.38925	0	0	134	5.10476	0.468043	0
rs344131	4_76598951_T_C	2	371	18.4669	6	1.66205	720	27.4286	0.673272	0.0605956
rs344131	4_76598951_T_C	3	828	41.2145	72	19.9446	1192	45.4095	0.907619	0.439216
rs344131	4_76598951_T_C	4	757	37.6804	283	78.3934	572	21.7905	1.72922	3.5976
rs344131	4_76600336_TG_T	0	80	3.98208	1	0.277008	69	2.62857	1.51492	0.105384
rs344131	4_76600336_TG_T	1	259	12.892	9	2.49307	521	19.8476	0.649548	0.125611
rs344131	4_76600336_TG_T	2	835	41.563	275	76.1773	1001	38.1333	1.08994	1.99766
rs344131	4_76600336_TG_T	3	654	32.5535	71	19.6676	792	30.1714	1.07895	0.651861
rs344131	4_76600336_TG_T	4	181	9.00946	5	1.38504	242	9.21905	0.977266	0.150237
rs344131	4_76607194_TG_T	0	4	0.199104	0	0	8	0.304762	0.65331	0
rs344131	4_76607194_TG_T	1	57	2.83723	0	0	154	5.86667	0.483619	0
rs344131	4_76607194_TG_T	2	402	20.01	6	1.66205	753	28.6857	0.697558	0.05794
rs344131	4_76607194_TG_T	3	844	42.011	82	22.7147	1175	44.7619	0.938543	0.507456
rs344131	4_76607194_TG_T	4	702	34.9428	273	75.6233	535	20.381	1.71448	3.71049
rs344131	4_76607668_A_C	0	80	3.98208	1	0.277008	67	2.55238	1.56014	0.108529
rs344131	4_76607668_A_C	1	252	12.5436	9	2.49307	497	18.9333	0.662512	0.131676
rs344131	4_76607668_A_C	2	818	40.7168	271	75.0693	986	37.5619	1.08399	1.99855
rs344131	4_76607668_A_C	3	652	32.454	74	20.4986	810	30.8571	1.05175	0.664307
rs344131	4_76607668_A_C	4	207	10.3036	6	1.66205	265	10.0952	1.02064	0.164637
rs344131	4_76607762_C_T	0	5	0.24888	0	0	8	0.304762	0.816638	0
rs344131	4_76607762_C_T	1	60	2.98656	0	0	154	5.86667	0.509073	0
rs344131	4_76607762_C_T	2	398	19.8109	7	1.93906	753	28.6857	0.690617	0.0675966
rs344131	4_76607762_C_T	3	846	42.1105	81	22.4377	1174	44.7238	0.941568	0.501694
rs344131	4_76607762_C_T	4	700	34.8432	273	75.6233	536	20.419	1.70641	3.70356
rs344131	4_76610715_A_AT	0	5	0.24888	0	0	8	0.304762	0.816638	0
rs344131	4_76610715_A_AT	1	58	2.88701	0	0	154	5.86667	0.492104	0
rs344131	4_76610715_A_AT	2	396	19.7113	7	1.93906	750	28.5714	0.689895	0.067867
rs344131	4_76610715_A_AT	3	841	41.8616	80	22.1607	1179	44.9143	0.932034	0.493399
rs344131	4_76610715_A_AT	4	709	35.2912	274	75.9003	534	20.3429	1.73482	3.73105
rs344131	4_76616368_G_A	0	4	0.199104	0	0	8	0.304762	0.65331	0
rs344131	4_76616368_G_A	1	57	2.83723	0	0	156	5.94286	0.477419	0
rs344131	4_76616368_G_A	2	389	19.3629	7	1.93906	744	28.3429	0.683166	0.0684144
rs344131	4_76616368_G_A	3	840	41.8118	72	19.9446	1180	44.9524	0.930136	0.443683
rs344131	4_76616368_G_A	4	719	35.7889	282	78.1163	537	20.4571	1.74946	3.81854
rs344131	4_76616835_T_C	0	4	0.199104	0	0	8	0.304762	0.65331	0
rs344131	4_76616835_T_C	1	60	2.98656	0	0	165	6.28571	0.475135	0
rs344131	4_76616835_T_C	2	401	19.9602	9	2.49307	774	29.4857	0.676944	0.084552
rs344131	4_76616835_T_C	3	864	43.0065	81	22.4377	1165	44.381	0.96903	0.50557
rs344131	4_76616835_T_C	4	680	33.8477	271	75.0693	513	19.5429	1.73197	3.84126
rs344131	4_76617283_A_ATAG	0	4	0.199104	0	0	8	0.304762	0.65331	0
rs344131	4_76617283_A_ATAG	1	59	2.93678	0	0	166	6.32381	0.464401	0
rs344131	4_76617283_A_ATAG	2	390	19.4126	10	2.77008	786	29.9429	0.648323	0.0925123
rs344131	4_76617283_A_ATAG	3	878	43.7033	78	21.6066	1160	44.1905	0.988976	0.488944
rs344131	4_76617283_A_ATAG	4	678	33.7481	273	75.6233	505	19.2381	1.75423	3.93091
rs344131	4_76619036_C_T	0	5	0.24888	0	0	8	0.304762	0.816638	0
rs344131	4_76619036_C_T	1	59	2.93678	0	0	165	6.28571	0.467216	0
rs344131	4_76619036_C_T	2	397	19.7611	8	2.21607	786	29.9429	0.65996	0.0740099
rs344131	4_76619036_C_T	3	864	43.0065	82	22.7147	1161	44.2286	0.972369	0.513575
rs344131	4_76619036_C_T	4	684	34.0468	271	75.0693	505	19.2381	1.76976	3.90211
rs344131	4_76619184_T_G	0	5	0.24888	0	0	8	0.304762	0.816638	0
rs344131	4_76619184_T_G	1	61	3.03634	0	0	166	6.32381	0.480144	0
rs344131	4_76619184_T_G	2	394	19.6117	9	2.49307	786	29.9429	0.654972	0.0832611
rs344131	4_76619184_T_G	3	868	43.2056	80	22.1607	1160	44.1905	0.977712	0.501481
rs344131	4_76619184_T_G	4	681	33.8975	272	75.3463	505	19.2381	1.762	3.91651
rs344131	4_76619736_G_A	0	5	0.24888	0	0	8	0.304762	0.816638	0
rs344131	4_76619736_G_A	1	59	2.93678	0	0	166	6.32381	0.464401	0
rs344131	4_76619736_G_A	2	390	19.4126	8	2.21607	787	29.981	0.647499	0.0739158
rs344131	4_76619736_G_A	3	875	43.554	81	22.4377	1159	44.1524	0.986448	0.508187
rs344131	4_76619736_G_A	4	680	33.8477	272	75.3463	505	19.2381	1.75941	3.91651
rs344131	4_76619740_G_A	0	5	0.24888	0	0	8	0.304762	0.816638	0
rs344131	4_76619740_G_A	1	59	2.93678	0	0	166	6.32381	0.464401	0
rs344131	4_76619740_G_A	2	390	19.4126	8	2.21607	786	29.9429	0.648323	0.0740099
rs344131	4_76619740_G_A	3	875	43.554	81	22.4377	1160	44.1905	0.985597	0.507749
rs344131	4_76619740_G_A	4	680	33.8477	272	75.3463	505	19.2381	1.75941	3.91651
rs344131	4_76619864_C_A	0	4	0.199104	0	0	8	0.304762	0.65331	0
rs344131	4_76619864_C_A	1	61	3.03634	0	0	166	6.32381	0.480144	0
rs344131	4_76619864_C_A	2	397	19.7611	8	2.21607	786	29.9429	0.65996	0.0740099
rs344131	4_76619864_C_A	3	830	41.3141	76	21.0526	1160	44.1905	0.934909	0.476407
rs344131	4_76619864_C_A	4	717	35.6894	277	76.7313	505	19.2381	1.85514	3.98851
rs344131	4_76620020_A_G	0	5	0.24888	0	0	8	0.304762	0.816638	0
rs344131	4_76620020_A_G	1	51	2.53858	0	0	165	6.28571	0.403864	0
rs344131	4_76620020_A_G	2	367	18.2678	9	2.49307	779	29.6762	0.615571	0.0840093
rs344131	4_76620020_A_G	3	667	33.2006	23	6.37119	1159	44.1524	0.751955	0.1443
rs344131	4_76620020_A_G	4	919	45.7442	329	91.1357	514	19.581	2.33616	4.65431
rs344131	4_76620356_C_T	0	4	0.199104	0	0	8	0.304762	0.65331	0
rs344131	4_76620356_C_T	1	59	2.93678	0	0	166	6.32381	0.464401	0
rs344131	4_76620356_C_T	2	403	20.0597	9	2.49307	786	29.9429	0.669934	0.0832611
rs344131	4_76620356_C_T	3	860	42.8074	78	21.6066	1159	44.1524	0.969537	0.489365
rs344131	4_76620356_C_T	4	683	33.997	274	75.9003	506	19.2762	1.76368	3.93751
rs344131	4_76620358_G_A	0	4	0.199104	0	0	8	0.304762	0.65331	0
rs344131	4_76620358_G_A	1	59	2.93678	0	0	166	6.32381	0.464401	0
rs344131	4_76620358_G_A	2	402	20.01	9	2.49307	786	29.9429	0.668271	0.0832611
rs344131	4_76620358_G_A	3	860	42.8074	78	21.6066	1159	44.1524	0.969537	0.489365
rs344131	4_76620358_G_A	4	684	34.0468	274	75.9003	506	19.2762	1.76626	3.93751
rs344131	4_76620513_A_C	0	4	0.199104	0	0	8	0.304762	0.65331	0
rs344131	4_76620513_A_C	1	58	2.88701	0	0	166	6.32381	0.45653	0
rs344131	4_76620513_A_C	2	399	19.8606	8	2.21607	787	29.981	0.662442	0.0739158
rs344131	4_76620513_A_C	3	869	43.2554	80	22.1607	1159	44.1524	0.979683	0.501913
rs344131	4_76620513_A_C	4	679	33.7979	273	75.6233	505	19.2381	1.75682	3.93091
rs344131	4_76620936_C_CAGG	0	5	0.24888	0	0	7	0.266667	0.9333	0
rs344131	4_76620936_C_CAGG	1	58	2.88701	0	0	164	6.24762	0.462097	0
rs344131	4_76620936_C_CAGG	2	398	19.8109	8	2.21607	777	29.6	0.669286	0.0748671
rs344131	4_76620936_C_CAGG	3	865	43.0562	81	22.4377	1171	44.6095	0.965181	0.502979
rs344131	4_76620936_C_CAGG	4	683	33.997	272	75.3463	506	19.2762	1.76368	3.90877
rs344131	4_76621536_C_A	0	4	0.199104	0	0	8	0.304762	0.65331	0
rs344131	4_76621536_C_A	1	57	2.83723	0	0	165	6.28571	0.451378	0
rs344131	4_76621536_C_A	2	395	19.6615	8	2.21607	788	30.019	0.654968	0.073822
rs344131	4_76621536_C_A	3	876	43.6038	80	22.1607	1157	44.0762	0.989282	0.502781
rs344131	4_76621536_C_A	4	677	33.6984	273	75.6233	507	19.3143	1.74474	3.91541
rs344131	4_76623853_G_A	0	4	0.199104	0	0	9	0.342857	0.58072	0
rs344131	4_76623853_G_A	1	58	2.88701	0	0	167	6.3619	0.453796	0
rs344131	4_76623853_G_A	2	399	19.8606	9	2.49307	799	30.4381	0.652492	0.0819064
rs344131	4_76623853_G_A	3	893	44.45	90	24.9307	1158	44.1143	1.00761	0.56514
rs344131	4_76623853_G_A	4	655	32.6033	262	72.5762	492	18.7429	1.7395	3.8722
rs344131	4_76626789_C_A	0	6	0.298656	0	0	9	0.342857	0.87108	0
rs344131	4_76626789_C_A	1	54	2.6879	0	0	163	6.20952	0.432868	0
rs344131	4_76626789_C_A	2	375	18.666	10	2.77008	759	28.9143	0.645563	0.0958033
rs344131	4_76626789_C_A	3	862	42.9069	78	21.6066	1173	44.6857	0.960193	0.483525
rs344131	4_76626789_C_A	4	712	35.4405	273	75.6233	521	19.8476	1.78563	3.81019
rs344131	4_76630255_G_A	0	4	0.199104	0	0	9	0.342857	0.58072	0
rs344131	4_76630255_G_A	1	55	2.73768	0	0	164	6.24762	0.438196	0
rs344131	4_76630255_G_A	2	374	18.6162	10	2.77008	755	28.7619	0.647253	0.0963108
rs344131	4_76630255_G_A	3	872	43.4047	77	21.3296	1171	44.6095	0.972991	0.478141
rs344131	4_76630255_G_A	4	704	35.0423	274	75.9003	526	20.0381	1.74878	3.7878
rs344131	4_76637624_C_T	0	85	4.23096	0	0	140	5.33333	0.793305	0
rs344131	4_76637624_C_T	1	226	11.2494	2	0.554017	511	19.4667	0.577879	0.0284598
rs344131	4_76637624_C_T	2	575	28.6212	32	8.86427	896	34.1333	0.838512	0.259695
rs344131	4_76637624_C_T	3	756	37.6307	141	39.0582	761	28.9905	1.29804	1.34728
rs344131	4_76637624_C_T	4	367	18.2678	186	51.5235	317	12.0762	1.51271	4.26654
rs344131	4_76641385_T_A	0	89	4.43006	0	0	143	5.44762	0.813211	0
rs344131	4_76641385_T_A	1	222	11.0503	2	0.554017	511	19.4667	0.567651	0.0284598
rs344131	4_76641385_T_A	2	581	28.9199	33	9.14127	889	33.8667	0.853933	0.26992
rs344131	4_76641385_T_A	3	751	37.3818	140	38.7812	760	28.9524	1.29115	1.33948
rs344131	4_76641385_T_A	4	366	18.218	186	51.5235	322	12.2667	1.48516	4.20029
rs344131	4_76641805_T_C	0	89	4.43006	0	0	143	5.44762	0.813211	0
rs344131	4_76641805_T_C	1	222	11.0503	2	0.554017	511	19.4667	0.567651	0.0284598
rs344131	4_76641805_T_C	2	584	29.0692	31	8.58726	889	33.8667	0.858342	0.253561
rs344131	4_76641805_T_C	3	757	37.6804	145	40.1662	760	28.9524	1.30146	1.38732
rs344131	4_76641805_T_C	4	357	17.77	183	50.6925	322	12.2667	1.44864	4.13254
rs344131	4_76643316_T_G	0	89	4.43006	0	0	143	5.44762	0.813211	0
rs344131	4_76643316_T_G	1	226	11.2494	3	0.831025	511	19.4667	0.577879	0.0426896
rs344131	4_76643316_T_G	2	582	28.9696	33	9.14127	889	33.8667	0.855403	0.26992
rs344131	4_76643316_T_G	3	727	36.1872	139	38.5042	760	28.9524	1.24989	1.32991
rs344131	4_76643316_T_G	4	385	19.1638	186	51.5235	322	12.2667	1.56226	4.20029
rs344131	4_76655249_A_G	0	2	0.099552	0	0	7	0.266667	0.37332	0
rs344131	4_76655249_A_G	1	47	2.33947	0	0	135	5.14286	0.454897	0
rs344131	4_76655249_A_G	2	368	18.3176	8	2.21607	757	28.8381	0.635187	0.0768451
rs344131	4_76655249_A_G	3	877	43.6536	85	23.5457	1200	45.7143	0.954922	0.515062
rs344131	4_76655249_A_G	4	715	35.5898	268	74.2382	526	20.0381	1.77611	3.70485
rs344131	4_76658004_G_C	0	2	0.099552	0	0	7	0.266667	0.37332	0
rs344131	4_76658004_G_C	1	50	2.4888	0	0	134	5.10476	0.487545	0
rs344131	4_76658004_G_C	2	368	18.3176	8	2.21607	757	28.8381	0.635187	0.0768451
rs344131	4_76658004_G_C	3	884	44.002	89	24.6537	1201	45.7524	0.961742	0.538852
rs344131	4_76658004_G_C	4	705	35.0921	264	73.1302	526	20.0381	1.75127	3.64956
rs344131	4_76662838_C_T	0	6	0.298656	0	0	12	0.457143	0.65331	0
rs344131	4_76662838_C_T	1	77	3.83275	0	0	173	6.59048	0.581559	0
rs344131	4_76662838_C_T	2	509	25.336	31	8.58726	911	34.7048	0.730044	0.247437
rs344131	4_76662838_C_T	3	801	39.8706	115	31.856	1136	43.2762	0.921305	0.736108
rs344131	4_76662838_C_T	4	616	30.662	215	59.5568	393	14.9714	2.04804	3.97803
rs344131	4_76663889_C_G	0	2	0.099552	0	0	6	0.228571	0.43554	0
rs344131	4_76663889_C_G	1	49	2.43902	0	0	133	5.06667	0.481386	0
rs344131	4_76663889_C_G	2	370	18.4171	9	2.49307	760	28.9524	0.636118	0.0861095
rs344131	4_76663889_C_G	3	869	43.2554	85	23.5457	1201	45.7524	0.945423	0.514633
rs344131	4_76663889_C_G	4	719	35.7889	267	73.9612	525	20	1.78945	3.69806
rs344131	4_76675042_A_C	0	2	0.099552	0	0	6	0.228571	0.43554	0
rs344131	4_76675042_A_C	1	41	2.04082	0	0	125	4.7619	0.428571	0
rs344131	4_76675042_A_C	2	359	17.8696	7	1.93906	728	27.7333	0.644336	0.069918
rs344131	4_76675042_A_C	3	859	42.7576	84	23.2687	1206	45.9429	0.930669	0.50647
rs344131	4_76675042_A_C	4	748	37.2325	270	74.7922	560	21.3333	1.74527	3.50589
rs344131	4_76704726_C_T	0	99	4.92782	0	0	167	6.3619	0.774583	0
rs344131	4_76704726_C_T	1	229	11.3987	2	0.554017	526	20.0381	0.568852	0.0276482
rs344131	4_76704726_C_T	2	590	29.3678	48	13.2964	862	32.8381	0.894322	0.404908
rs344131	4_76704726_C_T	3	736	36.6351	153	42.3823	733	27.9238	1.31197	1.51778
rs344131	4_76704726_C_T	4	355	17.6705	158	43.7673	337	12.8381	1.37641	3.40917
rs344131	4_76714751_T_C	0	75	3.7332	0	0	121	4.60952	0.809889	0
rs344131	4_76714751_T_C	1	203	10.1045	2	0.554017	462	17.6	0.574121	0.0314782
rs344131	4_76714751_T_C	2	562	27.9741	48	13.2964	864	32.9143	0.849908	0.40397
rs344131	4_76714751_T_C	3	712	35.4405	134	37.1191	803	30.5905	1.15855	1.21342
rs344131	4_76714751_T_C	4	457	22.7476	177	49.0305	375	14.2857	1.59233	3.43213
rs344131	4_76716349_A_C	0	99	4.92782	0	0	169	6.4381	0.765417	0
rs344131	4_76716349_A_C	1	213	10.6023	2	0.554017	487	18.5524	0.571479	0.0298623
rs344131	4_76716349_A_C	2	559	27.8248	46	12.7424	862	32.8381	0.847333	0.388037
rs344131	4_76716349_A_C	3	741	36.884	150	41.5512	732	27.8857	1.32269	1.49005
rs344131	4_76716349_A_C	4	397	19.7611	163	45.1524	375	14.2857	1.38328	3.16066
rs344131	4_76716860_T_C	0	99	4.92782	0	0	169	6.4381	0.765417	0
rs344131	4_76716860_T_C	1	210	10.453	2	0.554017	488	18.5905	0.562275	0.0298011
rs344131	4_76716860_T_C	2	569	28.3225	48	13.2964	861	32.8	0.863492	0.405378
rs344131	4_76716860_T_C	3	724	36.0378	147	40.7202	732	27.8857	1.29234	1.46025
rs344131	4_76716860_T_C	4	407	20.2588	164	45.4294	375	14.2857	1.41812	3.18006
rs344131	4_76724299_G_A	0	81	4.03186	0	0	160	6.09524	0.661476	0
rs344131	4_76724299_G_A	1	41	2.04082	0	0	23	0.87619	2.32919	0
rs344131	4_76724299_G_A	2	390	19.4126	6	1.66205	942	35.8857	0.540957	0.0463151
rs344131	4_76724299_G_A	3	241	11.996	22	6.09418	94	3.58095	3.34995	1.70183
rs344131	4_76724299_G_A	4	1256	62.5187	333	92.2438	1406	53.5619	1.16722	1.72219
rs344131	4_76726132_T_A	0	97	4.82827	0	0	185	7.04762	0.685093	0
rs344131	4_76726132_T_A	1	35	1.74216	1	0.277008	0	0	#DIV/0!	#DIV/0!
rs344131	4_76726132_T_A	2	431	21.4535	10	2.77008	1034	39.3905	0.544636	0.0703237
rs344131	4_76726132_T_A	3	215	10.7018	19	5.26316	1	0.0380952	280.923	138.158
rs344131	4_76726132_T_A	4	1231	61.2743	331	91.6898	1405	53.5238	1.1448	1.71306
rs344131	4_76726437_T_C	0	97	4.82827	0	0	185	7.04762	0.685093	0
rs344131	4_76726437_T_C	1	36	1.79194	1	0.277008	0	0	#DIV/0!	#DIV/0!
rs344131	4_76726437_T_C	2	337	16.7745	2	0.554017	1034	39.3905	0.425852	0.0140647
rs344131	4_76726437_T_C	3	250	12.444	16	4.43213	1	0.0380952	326.655	116.343
rs344131	4_76726437_T_C	4	1289	64.1613	342	94.7368	1405	53.5238	1.19874	1.76999
rs344131	rs344131	0	125	6.222	1	0.277008	185	7.04762	0.882851	0.0393052
rs344131	rs344131	1	0	0	0	0	0	0	#DIV/0!	#DIV/0!
rs344131	rs344131	2	451	22.449	10	2.77008	1034	39.3905	0.569909	0.0703237
rs344131	rs344131	3	0	0	0	0	0	0	#DIV/0!	#DIV/0!
rs344131	rs344131	4	1433	71.329	350	96.9529	1406	53.5619	1.33171	1.81011
rs344131	4_76726690_A_C	0	103	5.12693	0	0	185	7.04762	0.72747	0
rs344131	4_76726690_A_C	1	28	1.39373	1	0.277008	0	0	#DIV/0!	#DIV/0!
rs344131	4_76726690_A_C	2	420	20.9059	9	2.49307	1033	39.3524	0.531249	0.0633526
rs344131	4_76726690_A_C	3	134	6.66999	11	3.04709	2	0.0761905	87.5436	39.9931
rs344131	4_76726690_A_C	4	1324	65.9034	340	94.1828	1405	53.5238	1.23129	1.75964
rs344131	4_76734771_A_G	0	97	4.82827	0	0	184	7.00952	0.688816	0
rs344131	4_76734771_A_G	1	31	1.54306	0	0	1	0.0380952	40.5052	0
rs344131	4_76734771_A_G	2	426	21.2046	10	2.77008	1030	39.2381	0.540408	0.0705968
rs344131	4_76734771_A_G	3	223	11.1	21	5.81717	9	0.342857	32.3751	16.9668
rs344131	4_76734771_A_G	4	1232	61.324	330	91.4127	1401	53.3714	1.14901	1.71277
rs344131	4_76736806_C_CAG	0	97	4.82827	0	0	180	6.85714	0.704123	0
rs344131	4_76736806_C_CAG	1	28	1.39373	1	0.277008	5	0.190476	7.31707	1.45429
rs344131	4_76736806_C_CAG	2	446	22.2001	10	2.77008	1025	39.0476	0.568539	0.0709412
rs344131	4_76736806_C_CAG	3	206	10.2539	19	5.26316	14	0.533333	19.226	9.86842
rs344131	4_76736806_C_CAG	4	1232	61.324	331	91.6898	1401	53.3714	1.14901	1.71796
rs344131	4_76737660_G_GT	0	90	4.47984	0	0	174	6.62857	0.675838	0
rs344131	4_76737660_G_GT	1	32	1.59283	1	0.277008	10	0.380952	4.18118	0.727147
rs344131	4_76737660_G_GT	2	417	20.7566	8	2.21607	1023	38.9714	0.532611	0.0568639
rs344131	4_76737660_G_GT	3	221	11.0005	20	5.54017	18	0.685714	16.0424	8.07941
rs344131	4_76737660_G_GT	4	1249	62.1702	332	91.9668	1400	53.3333	1.16569	1.72438
rs344131	4_76737926_G_GTGCCA	0	97	4.82827	0	0	183	6.97143	0.69258	0
rs344131	4_76737926_G_GTGCCA	1	34	1.69238	1	0.277008	2	0.0761905	22.2125	3.63573
rs344131	4_76737926_G_GTGCCA	2	427	21.2544	9	2.49307	1029	39.2	0.542203	0.0635988
rs344131	4_76737926_G_GTGCCA	3	218	10.8512	20	5.54017	11	0.419048	25.8948	13.2209
rs344131	4_76737926_G_GTGCCA	4	1233	61.3738	331	91.6898	1400	53.3333	1.15076	1.71918
rs344131	4_76737937_T_C	0	91	4.52962	0	0	178	6.78095	0.667991	0
rs344131	4_76737937_T_C	1	35	1.74216	2	0.554017	6	0.228571	7.62195	2.42382
rs344131	4_76737937_T_C	2	426	21.2046	9	2.49307	1023	38.9714	0.544106	0.0639719
rs344131	4_76737937_T_C	3	216	10.7516	18	4.98615	18	0.685714	15.6794	7.27147
rs344131	4_76737937_T_C	4	1241	61.772	332	91.9668	1400	53.3333	1.15823	1.72438
rs344131	4_76739009_G_C	0	111	5.52514	1	0.277008	181	6.89524	0.801297	0.0401739
rs344131	4_76739009_G_C	1	212	10.5525	1	0.277008	507	19.3143	0.546358	0.0143421
rs344131	4_76739009_G_C	2	559	27.8248	45	12.4654	851	32.419	0.858285	0.384508
rs344131	4_76739009_G_C	3	734	36.5356	145	40.1662	706	26.8952	1.35844	1.49343
rs344131	4_76739009_G_C	4	393	19.562	169	46.8144	380	14.4762	1.35132	3.23389
rs344131	4_76739578_C_G	0	97	4.82827	0	0	179	6.81905	0.708057	0
rs344131	4_76739578_C_G	1	27	1.34395	1	0.277008	6	0.228571	5.87979	1.21191
rs344131	4_76739578_C_G	2	440	21.9014	11	3.04709	1020	38.8571	0.56364	0.0784178
rs344131	4_76739578_C_G	3	217	10.8014	19	5.26316	18	0.685714	15.752	7.67544
rs344131	4_76739578_C_G	4	1228	61.1249	330	91.4127	1402	53.4095	1.14446	1.71154
rs344131	4_76741095_G_A	0	93	4.62917	1	0.277008	174	6.62857	0.698366	0.04179
rs344131	4_76741095_G_A	1	33	1.64261	1	0.277008	12	0.457143	3.59321	0.605956
rs344131	4_76741095_G_A	2	383	19.0642	9	2.49307	1010	38.4762	0.495481	0.0647953
rs344131	4_76741095_G_A	3	228	11.3489	17	4.70914	30	1.14286	9.93031	4.1205
rs344131	4_76741095_G_A	4	1272	63.3151	333	92.2438	1399	53.2952	1.18801	1.73081
rs344131	4_76741156_C_T	0	94	4.67894	0	0	173	6.59048	0.709955	0
rs344131	4_76741156_C_T	1	35	1.74216	1	0.277008	13	0.495238	3.51782	0.559344
rs344131	4_76741156_C_T	2	391	19.4624	9	2.49307	1005	38.2857	0.508347	0.0651176
rs344131	4_76741156_C_T	3	226	11.2494	19	5.26316	35	1.33333	8.43703	3.94737
rs344131	4_76741156_C_T	4	1263	62.8671	332	91.9668	1399	53.2952	1.1796	1.72561
rs344131	4_76750211_T_A	0	111	5.52514	1	0.277008	180	6.85714	0.805749	0.040397
rs344131	4_76750211_T_A	1	216	10.7516	1	0.277008	512	19.5048	0.55123	0.0142021
rs344131	4_76750211_T_A	2	561	27.9243	51	14.1274	852	32.4571	0.860345	0.435264
rs344131	4_76750211_T_A	3	722	35.9383	136	37.6731	702	26.7429	1.34385	1.40872
rs344131	4_76750211_T_A	4	399	19.8606	172	47.6454	379	14.4381	1.37557	3.29998
rs344131	4_76789079_C_CA	0	62	3.08611	0	0	105	4	0.771528	0
rs344131	4_76789079_C_CA	1	63	3.13589	0	0	88	3.35238	0.935421	0
rs344131	4_76789079_C_CA	2	316	15.7292	13	3.60111	792	30.1714	0.521328	0.119355
rs344131	4_76789079_C_CA	3	315	15.6794	16	4.43213	323	12.3048	1.27426	0.360197
rs344131	4_76789079_C_CA	4	1253	62.3693	332	91.9668	1317	50.1714	1.24312	1.83305
rs344131	4_76813630_GCAT_G	0	42	2.09059	0	0	61	2.32381	0.89964	0
rs344131	4_76813630_GCAT_G	1	163	8.11349	2	0.554017	454	17.2952	0.469117	0.0320329
rs344131	4_76813630_GCAT_G	2	551	27.4266	36	9.9723	896	34.1333	0.803513	0.292157
rs344131	4_76813630_GCAT_G	3	801	39.8706	162	44.8753	894	34.0571	1.1707	1.31765
rs344131	4_76813630_GCAT_G	4	452	22.4988	161	44.5983	320	12.1905	1.8456	3.65846
rs344131	4_76814253_G_T	0	41	2.04082	0	0	60	2.28571	0.892857	0
rs344131	4_76814253_G_T	1	168	8.36237	2	0.554017	454	17.2952	0.483507	0.0320329
rs344131	4_76814253_G_T	2	543	27.0284	36	9.9723	895	34.0952	0.792732	0.292484
rs344131	4_76814253_G_T	3	824	41.0154	163	45.1524	894	34.0571	1.20431	1.32578
rs344131	4_76814253_G_T	4	433	21.553	160	44.3213	322	12.2667	1.75704	3.61315
