# Supplementary material for: Commoncis-regulatory variation modifies the penetrance of pathogenicSHROOM3variants in craniofacial microsomia
Source: HighWire-hosted journal article supplement (doi:10.1101/gr.280047.124), 2025-04-15
Supplement: Supplemental_Fig_S2.pdf [file Supplemental_Fig_S2.pdf]

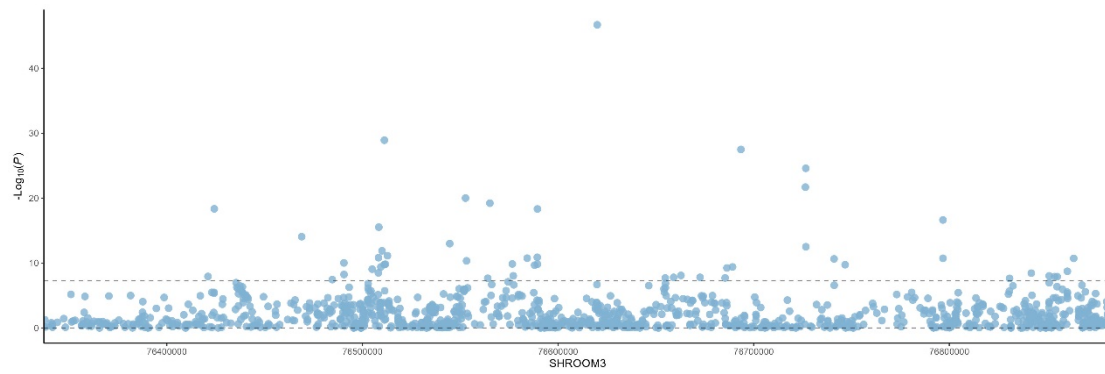

**Supplementary Figure 2. Analysis of CFM-associated variants in the *SHROOM3* region.** This figure illustrates the variants linked to CFM within the *SHROOM3* gene region. The logistic regression *P*-values have been adjusted for population stratification, utilizing the first 20 eigenvectors from principal component analysis as covariates. The plot specifically focuses on variants exhibiting a minor allele frequency greater than 0.05.
