# Supplementary material for: Commoncis-regulatory variation modifies the penetrance of pathogenicSHROOM3variants in craniofacial microsomia
Source: HighWire-hosted journal article supplement (doi:10.1101/gr.280047.124), 2025-04-15
Supplement: Supplemental_Fig_S3.pdf [file Supplemental_Fig_S3.pdf]

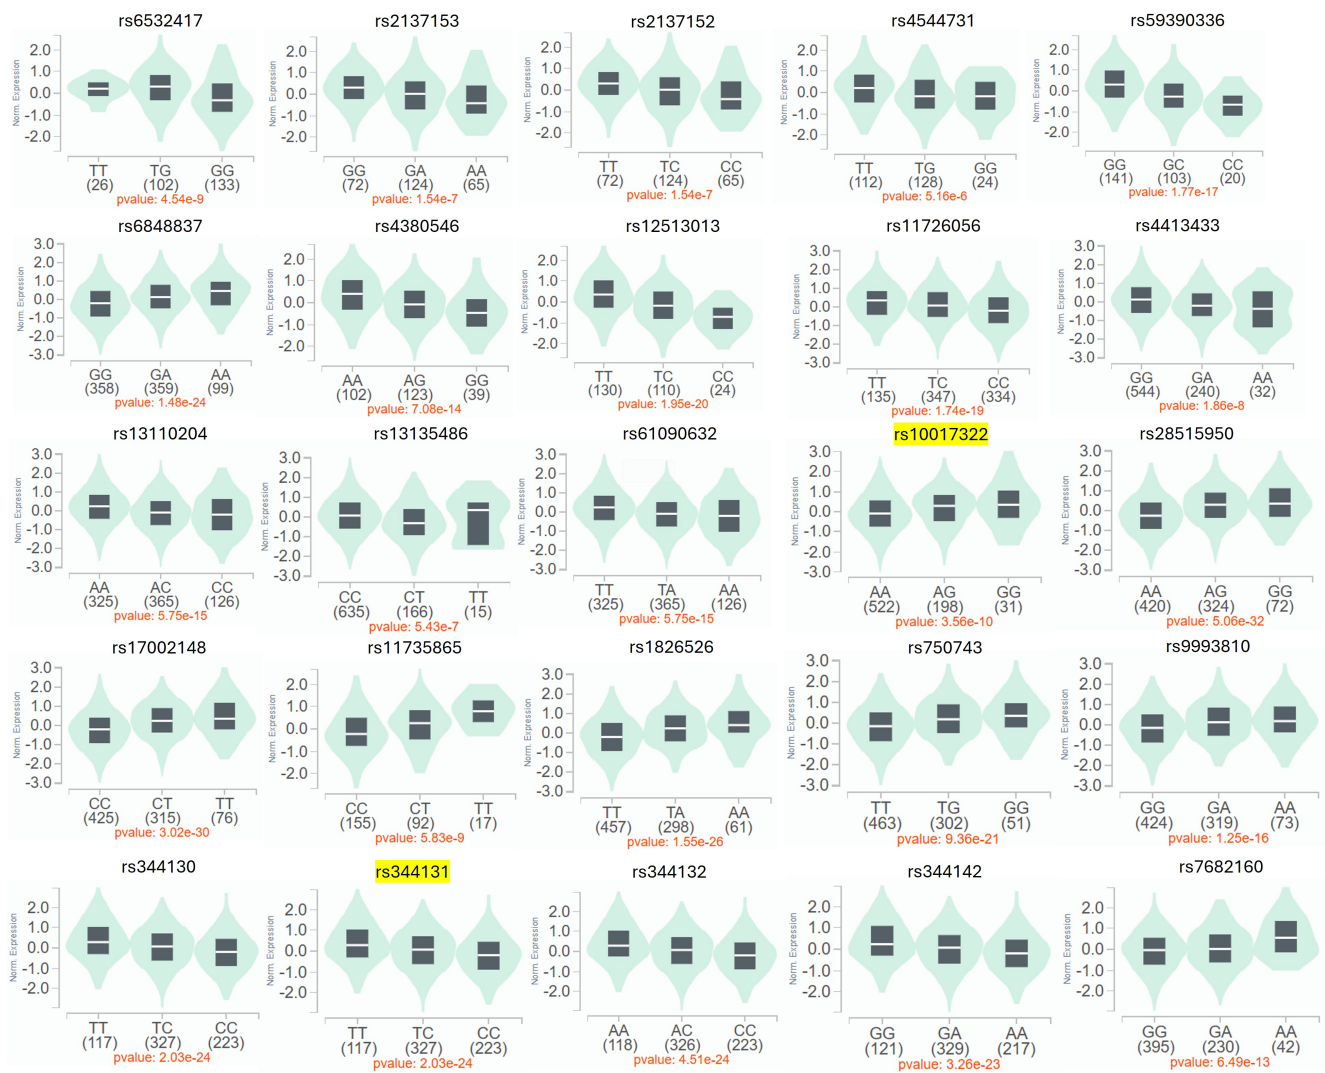

**Supplementary Figure 3. All identified variants have been characterized as eQTL associated with the regulation of *SHROOM3* expression.** Each data point corresponds to an individual, with the genotypes categorized as AA, AG, and GG for rs10017322, and TT, TC, and CC for rs344131, etc. The statistical significance (*P*-values) is derived from the GTEx database. A number of additional eQTLs for *SHROOM3* are also shown.
