# Supplementary material for: Commoncis-regulatory variation modifies the penetrance of pathogenicSHROOM3variants in craniofacial microsomia
Source: HighWire-hosted journal article supplement (doi:10.1101/gr.280047.124), 2025-04-15
Supplement: Supplemental_Fig_S4.pdf [file Supplemental_Fig_S4.pdf]

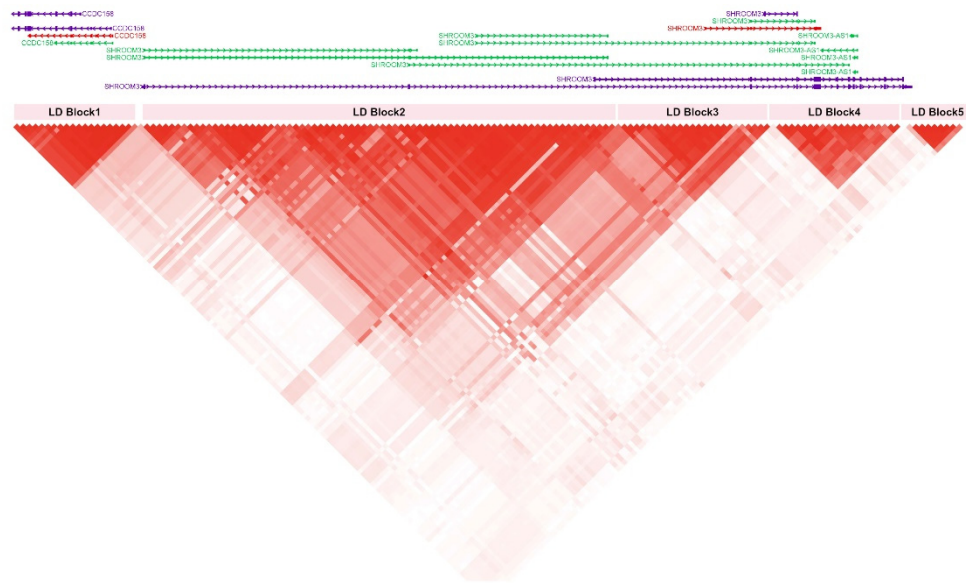

**Supplementary Figure 4. Linkage disequilibrium (LD) blocks in the *SHROOM3* gene region.** For the construction of LD blocks in this region, only single nucleotide polymorphisms with a minor allele frequency greater than 0.1 were utilized.
