# Supplementary material for: Commoncis-regulatory variation modifies the penetrance of pathogenicSHROOM3variants in craniofacial microsomia
Source: HighWire-hosted journal article supplement (doi:10.1101/gr.280047.124), 2025-04-15
Supplement: Supplemental_Fig_S6.pdf [file Supplemental_Fig_S6.pdf]

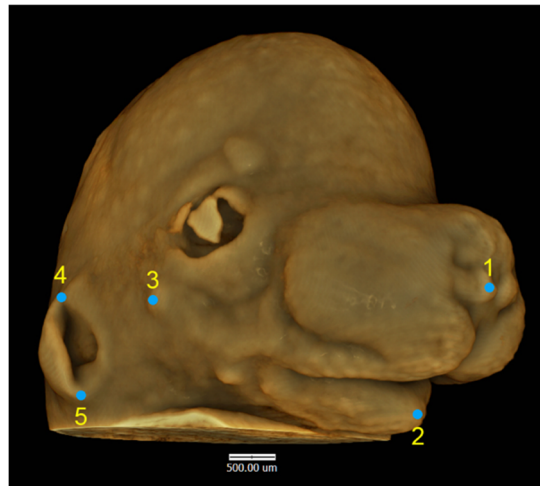

### Landmarks

#### Facial

- 1 distal tip of lateral bulge medial to nare
- 2 distal mid-point of mandible
- 3 upper genal vibrissa follicle
- 4 rostral-most edge of external ear
- 5 caudal-most edge of external ear

Right side: Landmarks 1-5.

Left side: Landmarks 1'-5'.

Landmarks 1, 3, 4, and 5 are paired and used for lateral measurements, whereas landmark 2 is central and used (with landmark 5 and 5') for the measurement of mandibular length on both sides.

### Distances measured

#### Each side of face

- |       |                                         |
|-------|-----------------------------------------|
| 1-3   | maxillary length (right)                |
| 1'-3' | maxillary length (left)                 |
| 2-5   | mandibular length (right)               |
| 2'-5' | mandibular length (left)                |
| 4-5   | external ear height (right)             |
| 4'-5' | external ear height (left)              |
| 5-5'  | inter-auricular width (head size proxy) |

**Supplementary Figure 6. Location and description of landmarks used for the quantitative assessment of craniofacial shape and symmetry.** Five landmarks (1-5) are shown on the face of a wildtype E14.5 embryo. Landmark #2 is the only midline landmark and was used also for the left side measurements. Contralateral landmarks, corresponding to landmarks #1, 3, 4 and 5, were also collected on the left side of the face. The inter-landmark distances measured are indicated.
