# Supplementary material for: Commoncis-regulatory variation modifies the penetrance of pathogenicSHROOM3variants in craniofacial microsomia
Source: HighWire-hosted journal article supplement (doi:10.1101/gr.280047.124), 2025-04-15
Supplement: Supplemental_Source_Data.xlsx [file Supplemental_Source_Data.xlsx]

## Sheet: Figure S1
Supplementary Figure 1. Quantification of predicted deleterious mutations in CFM risk genes in 2,009 Chinese CFM patients and 2,625 Han Chinese from the SG10K project
Gene	CCFM	Healthy Han Chinese
SHROOM3	46	32
PARD3B	33	27
ARID3B	21	9
MUSK	15	16
NKX3-1	9	1
CXCL12	8	8
FGF3	8	9
SEMA7A	7	15
GBX2	7	5
LPAR1	4	2
NKX2-6	3	13

## Sheet: Figure 4B
Figure 4B. Luciferase assays to assess the effects of rs344131, rs10017322, rs18970263, rs344126 and rs74918804 on SHROOM3 enhancers
	Firefly/Renilla luminescence				Average	SD	P value
Blank_luc	0.87427	1.23745	0.729018	1.15926	1	0.206752
rs344131-A	18.862	16.6599	14.2362	14.0599	15.9545	1.96806	0.00103338
rs344131-G	4.90706	5.70467	6.56515	4.44923	5.40653	0.805787
rs10017322-A	0.375607	0.501947	0.373542	0.375081	0.406544	0.0550861	0.13147
rs10017322-G	0.292802	0.390802	0.370776	0.230486	0.321217	0.0639094
rs189707263-G	3.21711	2.65455	3.81241	2.67521	3.08982	0.47426	0.0019764
rs189707263-T	0.37363	0.361292	0.373472	0.523037	0.407858	0.066687
rs344126-G	1.46282	2.07732	2.20242	2.34523	2.02195	0.336443	0.00228004
rs344126-A	0.232562	0.173606	0.125027	0.199185	0.182595	0.0392646
rs74918804-WT	1.65759	1.40226	0.919667	0.874359	1.21347	0.329471	0.22655
rs74918804-InsC	1.69706	1.34259	1.70409	1.3222	1.51649	0.184246

## Sheet: Figure 4C
Figure 4B. Enrichment analysis of risk allele combinations for eQTLs rs344131 and rs61090632 in CFM patients compared to control populations.
Population	Number of risk allele	Percent of risk allele
CASPMI	0	15.2371
CASPMI	1	45.2069
CASPMI	2	33.7033
CASPMI	3	5.54995
CASPMI	4	0.302725
WBBC	0	15
WBBC	1	33.4167
WBBC	2	34.25
WBBC	3	13.9167
WBBC	4	3.41667
SG10K	0	11.7333
SG10K	1	16.8
SG10K	2	32.6857
SG10K	3	20.6476
SG10K	4	18.1333
CFM	0	8.36237
CFM	1	10.0548
CFM	2	26.3315
CFM	3	25.4355
CFM	4	29.8158
SHROOM3 CFM	0	0.831025
SHROOM4 CFM	1	2.49307
SHROOM5 CFM	2	11.9114
SHROOM6 CFM	3	28.8089
SHROOM7 CFM	4	55.9557

## Sheet: Figure 4D
Figure 4D. Luciferase assay results demonstrating the combined effect of alleles rs344131 and rs61090632 in HEK-293T cells.
	Firefly/Renilla luminescence									Average	SD	P value	P value	P value	P value
Blank_luc	2.48069	1.37267	3.55274	2.26042	1.13	2.30189	2.33096	2.89492	1.84795	2.24136	0.696077	vs Blank_luc
AT	19.4409	22.9901	20.1589	19.6756	24.3352	19.9572	15.6972	13.543	11.1373	18.5484	4.05475	2.26597e-06	vs AT
AA	3.20364	3	3.16784	3.193	2.73275	2.76068	6.21378	5.62387	6.67669	4.06358	1.51972	0.0101906	2.26628e-06	vs AA
GT	1.23181	1.31575	1.37304	1.27129	1.52292	1.30993	2.39022	2.37978	2.96318	1.75088	0.610271	0.153774	1.94033e-06	0.00230162	vs GT
GA	1.18474	1.10246	1.10558	1.23364	1.2092	0.956132	1.57886	1.80156	1.83195	1.33379	0.302401	0.00618071	1.98408e-06	0.000857107	0.109496

## Sheet: Figure 5A-D
Figure 5. In vivo analysis of Shroom3 zygosity in mice is associated with microtia and facial asymmetry.
Sample	Geno	Age	right mand	left mand	ratio	abs asymm	ave mand		Geno	Age	right max	left max	ratio	abs asymm	ave max		Geno	Age	right ear	left ear	ave ear	ratio	abs asymm		Geno	Age	interauric	inter-R ratio	inter-L ratio	ratio	abs asymm		Geno	Age	normalztn-interauric	normalized R-ear	normalized L-ear	Ave norm ear	ratio	abs asymm		Geno	Age	norm-max	norm-mand
4146-C	WT	E14.25	3590.51	3474.44	1.03341	0.0334068	3532.48		WT	E14.25	4693.68	4620.35	1.01587	0.0158711	4657.02		WT	E14.25	1082.02	1085.57	1083.8	0.99673	0.00327017		WT	E14.25	4088.07	3.77818	3.76583	1.00328	0.0032809		WT	E14.25	1.34383	1454.05	1458.82	1456.44	0.99673	0.00327017		WT	E14.25	6258.24	4747.04
4618-B	WT	E14.25	3600.56	3682.66	0.977706	0.0222937	3641.61		WT	E14.25	4665.93	4710.66	0.990505	0.00949548	4688.3		WT	E14.25	1115.02	1139.2	1127.11	0.978775	0.0212254		WT	E14.25	4240.56	3.80312	3.7224	1.02169	0.0216857		WT	E14.25	1.29551	1444.51	1475.84	1460.18	0.978775	0.0212254		WT	E14.25	6073.71	4717.73
W9_4-3	WT	E14.25	3938.5	4003.1	0.983863	0.0161375	3970.8		WT	E14.25	4648.78	4736.06	0.981571	0.0184288	4692.42		WT	E14.25	1091.14	1069.7	1080.42	1.02004	0.020043		WT	E14.25	4285.21	3.92728	4.00599	0.980351	0.0196492		WT	E14.25	1.28201	1398.85	1371.36	1385.11	1.02004	0.020043		WT	E14.25	6015.72	5090.59
4618-A	WT	E14.75	4426.85	4384.67	1.00962	0.00961988	4405.76		WT	E14.75	5324.26	5139.04	1.03604	0.0360418	5231.65		WT	E14.75	1135.78	1156.8	1146.29	0.981829	0.0181708		WT	E14.75	4773.14	4.20252	4.12616	1.01851	0.0185071		WT	E14.75	1.15096	1307.23	1331.42	1319.33	0.981829	0.0181708		WT	E14.75	6021.39	5070.83
4618-C	WT	E14.75	4459.74	4330.55	1.02983	0.0298322	4395.15		WT	E14.75	5349.47	5393.72	0.991796	0.00820399	5371.6		WT	E14.75	1228.57	1119.05	1173.81	1.09787	0.0978687		WT	E14.75	4903.39	3.99114	4.38174	0.910856	0.0891443		WT	E14.75	1.12038	1376.47	1253.76	1315.12	1.09787	0.0978687		WT	E14.75	6018.24	4924.24
4618-F	WT	E14.75	4672.33	4473.62	1.04442	0.0444182	4572.98		WT	E14.75	5579.19	5441.08	1.02538	0.0253828	5510.14		WT	E14.75	1198.7	1192.22	1195.46	1.00544	0.00543524		WT	E14.75	5001.93	4.1728	4.19548	0.994594	0.00540586		WT	E14.75	1.09831	1316.54	1309.43	1312.99	1.00544	0.00543524		WT	E14.75	6051.84	5022.54
W9_2-5	WT	E15.25	5028.13	5016.97	1.00222	0.00222445	5022.55		WT	E15.25	5852.15	5806.79	1.00781	0.00781154	5829.47		WT	E15.25	1251.19	1246.3	1248.74	1.00392	0.00392361		WT	E15.25	5132.28	4.10192	4.11801	0.996092	0.00390828		WT	E15.25	1.07042	1339.29	1334.06	1336.68	1.00392	0.00392361		WT	E15.25	6239.95	5376.21
W9_2-8	WT	E15.25	5572.3	5626.61	0.990348	0.00965235	5599.45		WT	E15.25	6358.61	6430.71	0.988788	0.0112118	6394.66		WT	E15.25	1359.6	1385.87	1372.73	0.981044	0.0189556		WT	E15.25	5480.37	4.03087	3.95446	1.01932	0.0193219		WT	E15.25	1.00243	1362.9	1389.23	1376.07	0.981044	0.0189556		WT	E15.25	6410.18	5613.04
W9_1-2	WT	E15.25	5554.94	5597.09	0.992469	0.0075307	5576.01		WT	E15.25	6201.18	6079.7	1.01998	0.0199812	6140.44		WT	E15.25	1351.51	1304.19	1327.85	1.03628	0.0362831		WT	E15.25	5354.91	3.96217	4.10593	0.964987	0.0350127		WT	E15.25	1.02591	1386.53	1337.99	1362.26	1.03628	0.0362831		WT	E15.25	6299.56	5720.5
W9_1-1	WT	E15.25	5416.61	5284.35	1.02503	0.0250286	5350.48		WT	E15.25	6022.06	5834.94	1.03207	0.0320689	5928.5		WT	E15.25	1336.56	1298.53	1317.55	1.02929	0.029287		WT	E15.25	5174.04	3.87116	3.98454	0.971546	0.0284536		WT	E15.25	1.06178	1419.13	1378.75	1398.94	1.02929	0.029287		WT	E15.25	6294.74	5681.01
4146-A	HET	E14.25	3395.05	3432.22	0.98917	0.0108297	3413.64		HET	E14.25	4577.74	4589.47	0.997444	0.00255585	4583.6		HET	E14.25	1091.56	1032.95	1062.26	1.05674	0.0567404		HET	E14.25	3985.18	3.6509	3.85806	0.946306	0.0536938		HET	E14.25	1.37852	1504.74	1423.95	1464.35	1.05674	0.0567404		HET	E14.25	6318.61	4705.78
4146-B	HET	E14.25	3626.64	3361.81	1.07878	0.078776	3494.22		HET	E14.25	4790.02	4532.02	1.05693	0.0569283	4661.02		HET	E14.25	1049.18	1037.31	1043.24	1.01144	0.0114431		HET	E14.25	3970.93	3.78479	3.8281	0.988686	0.0113136		HET	E14.25	1.38347	1451.51	1435.09	1443.3	1.01144	0.0114431		HET	E14.25	6448.39	4834.16
4146-E	HET	E14.25	3306.17	3383.8	0.977058	0.0229417	3344.99		HET	E14.25	4469.14	4427.74	1.00935	0.00935014	4448.44		HET	E14.25	1039.53	1060.87	1050.2	0.979884	0.0201156		HET	E14.25	3893.7	3.74564	3.67029	1.02053	0.0205285		HET	E14.25	1.41091	1466.69	1496.79	1481.74	0.979884	0.0201156		HET	E14.25	6276.36	4719.48
4653-B	HET	E14.75	4377.51	4202.01	1.04177	0.0417657	4289.76		HET	E14.75	5244.51	4998.49	1.04922	0.0492189	5121.5		HET	E14.75	1134.3	1044.46	1089.38	1.08602	0.0860157		HET	E14.75	4468.8	3.9397	4.27857	0.920797	0.079203		HET	E14.75	1.22934	1394.44	1284	1339.22	1.08602	0.0860157		HET	E14.75	6296.06	5273.57
4653-E	HET	E14.75	3906.24	4103.8	0.951859	0.0481407	4005.02		HET	E14.75	4975.35	4899.27	1.01553	0.0155288	4937.31		HET	E14.75	1049.49	997.72	1023.61	1.05189	0.0518883		HET	E14.75	4321.15	4.11738	4.33102	0.950671	0.0493287		HET	E14.75	1.27134	1334.26	1268.45	1301.35	1.05189	0.0518883		HET	E14.75	6277.02	5091.76
4653-F	HET	E14.75	4456.6	4398.1	1.0133	0.0133012	4427.35		HET	E14.75	5387.78	5298.14	1.01692	0.0169191	5342.96		HET	E14.75	1083.54	1086.1	1084.82	0.997643	0.00235706		HET	E14.75	4622.32	4.26594	4.25589	1.00236	0.00236263		HET	E14.75	1.18851	1287.8	1290.84	1289.32	0.997643	0.00235706		HET	E14.75	6350.16	5261.95
4653-G	HET	E14.75	3981.53	4121.14	0.966123	0.0338765	4051.34		HET	E14.75	5046.69	5229.33	0.965074	0.0349261	5138.01		HET	E14.75	1128.15	1038.59	1083.37	1.08623	0.0862323		HET	E14.75	4497.45	3.98657	4.33034	0.920613	0.0793866		HET	E14.75	1.22151	1378.04	1268.65	1323.34	1.08623	0.0862323		HET	E14.75	6276.12	4948.74
4618-D	HET	E14.75	3814.45	3909.35	0.975725	0.0242751	3861.9		HET	E14.75	4760.26	4869.1	0.977647	0.0223532	4814.68		HET	E14.75	1170.4	1138.3	1154.35	1.0282	0.0281999		HET	E14.75	4461.72	3.81213	3.91963	0.972573	0.0274265		HET	E14.75	1.23129	1441.1	1401.58	1421.34	1.0282	0.0281999		HET	E14.75	5928.27	4755.12
4618-E	HET	E14.75	4366.91	4414.16	0.989296	0.0107042	4390.53		HET	E14.75	5423.09	5405.93	1.00317	0.00317429	5414.51		HET	E14.75	1196.01	1105.35	1150.68	1.08202	0.0820193		HET	E14.75	5011.26	4.18998	4.53364	0.924198	0.075802		HET	E14.75	1.09627	1311.14	1211.76	1261.45	1.08202	0.0820193		HET	E14.75	5935.74	4813.19
4618-G	HET	E14.75	4306.66	4383.81	0.982401	0.0175988	4345.24		HET	E14.75	5234.14	5224.14	1.00191	0.00191419	5229.14		HET	E14.75	1243.23	1159.14	1201.18	1.07255	0.0725452		HET	E14.75	4821.19	3.87796	4.15928	0.932362	0.0676383		HET	E14.75	1.13948	1416.64	1320.82	1368.73	1.07255	0.0725452		HET	E14.75	5958.52	4951.33
4618-H	HET	E14.75	4082.88	3996.32	1.02166	0.0216599	4039.6		HET	E14.75	5024.32	4875.96	1.03043	0.0304268	4950.14		HET	E14.75	1199.05	1073.01	1136.03	1.11746	0.117464		HET	E14.75	4557.46	3.80089	4.24736	0.894883	0.105117		HET	E14.75	1.20542	1445.36	1293.43	1369.4	1.11746	0.117464		HET	E14.75	5967.02	4869.43
5058-A	HET	E15.25	5311.75	5233.3	1.01499	0.0149905	5272.52		HET	E15.25	6081.2	5994.83	1.01441	0.0144074	6038.01		HET	E15.25	1381.33	1308.53	1344.93	1.05563	0.0556349		HET	E15.25	5384.6	3.89813	4.115	0.947297	0.0527028		HET	E15.25	1.02026	1409.31	1335.04	1372.17	1.05563	0.0556349		HET	E15.25	6160.32	5379.32
5058-B	HET	E15.25	4399.27	4300.98	1.02285	0.0228529	4350.12		HET	E15.25	5252.31	5093.65	1.03115	0.0311486	5172.98		HET	E15.25	1288.89	1175.25	1232.07	1.09669	0.0966943		HET	E15.25	4694.23	3.64207	3.99424	0.911831	0.0881689		HET	E15.25	1.1703	1508.39	1375.4	1441.89	1.09669	0.0966943		HET	E15.25	6053.95	5090.96
5058-C	HET	E15.25	5570.51	5453.03	1.02154	0.021544	5511.77		HET	E15.25	6228.13	6138.52	1.0146	0.014598	6183.33		HET	E15.25	1316.12	1439.46	1377.79	0.914315	0.0856849		HET	E15.25	5493.67	4.17414	3.81648	1.09371	0.0937149		HET	E15.25	1	1316.12	1439.46	1377.79	0.914315	0.0856849		HET	E15.25	6183.33	5511.77
5058-D	HET	E15.25	5245.31	5302.51	0.989213	0.0107873	5273.91		HET	E15.25	5803.23	5985.73	0.969511	0.0304892	5894.48		HET	E15.25	1211.05	1329.67	1270.36	0.91079	0.0892101		HET	E15.25	5179.93	4.27722	3.89565	1.09795	0.0979481		HET	E15.25	1.06057	1284.4	1410.21	1347.3	0.91079	0.0892101		HET	E15.25	6251.5	5593.34
5058-E	HET	E15.25	5481.96	5710.23	0.960024	0.0399756	5596.09		HET	E15.25	6201.77	6387.96	0.970853	0.029147	6294.86		HET	E15.25	1401.85	1421.26	1411.55	0.986343	0.0136569		HET	E15.25	5352.09	3.81788	3.76574	1.01385	0.013846		HET	E15.25	1.02645	1438.93	1458.86	1448.9	0.986343	0.0136569		HET	E15.25	6461.38	5744.13
5058-F	HET	E15.25	5382.01	5275.12	1.02026	0.020263	5328.57		HET	E15.25	6072.41	5783.59	1.04994	0.0499378	5928		HET	E15.25	1414.45	1365.8	1390.12	1.03562	0.0356201		HET	E15.25	5335.85	3.77239	3.90676	0.965605	0.034395		HET	E15.25	1.02958	1456.29	1406.2	1431.24	1.03562	0.0356201		HET	E15.25	6103.33	5486.17
4146-F	HOMO	E14.25	2999.43	2616.77	1.14623	0.146234	2808.1		HOMO	E14.25	3806.46	3481.36	1.09338	0.093383	3643.91		HOMO	E14.25	818.5	858.53	838.515	0.953374	0.0466262		HOMO	E14.25	3483.66	4.25615	4.0577	1.04891	0.0489065		HOMO	E14.25	1.57698	1290.76	1353.89	1322.32	0.953374	0.0466262		HOMO	E14.25	5746.38	4428.32
4146-G	HOMO	E14.25	2518.65	2331.47	1.08028	0.0802841	2425.06		HOMO	E14.25	3465.14	3414.9	1.01471	0.014712	3440.02		HOMO	E14.25	776.6	813.03	794.815	0.955192	0.0448077		HOMO	E14.25	3125.42	4.02449	3.84416	1.04691	0.0469096		HOMO	E14.25	1.75774	1365.06	1429.09	1397.08	0.955192	0.0448077		HOMO	E14.25	6046.65	4262.62
4653-H	HOMO	E14.75	3449.89	3310.72	1.04204	0.0420362	3380.3		HOMO	E14.75	4239.71	4095.49	1.03521	0.0352143	4167.6		HOMO	E14.75	893.53	901.39	897.46	0.99128	0.00871987		HOMO	E14.75	3906.36	4.37183	4.33371	1.0088	0.00879657		HOMO	E14.75	1.40634	1256.61	1267.66	1262.13	0.99128	0.00871987		HOMO	E14.75	5861.06	4753.86
4653-I	HOMO	E14.75	3988.29	3891.89	1.02477	0.0247695	3940.09		HOMO	E14.75	4877.13	4688.13	1.04031	0.0403146	4782.63		HOMO	E14.75	929.31	897.62	913.465	1.0353	0.0353045		HOMO	E14.75	4298.65	4.62564	4.78894	0.965899	0.0341006		HOMO	E14.75	1.278	1187.66	1147.16	1167.41	1.0353	0.0353045		HOMO	E14.75	6112.2	5035.43
4653-J	HOMO	E14.75	3777.67	3590.41	1.05216	0.0521556	3684.04		HOMO	E14.75	4611.74	4383.06	1.05217	0.0521736	4497.4		HOMO	E14.75	973.71	924.85	949.28	1.05283	0.0528302		HOMO	E14.75	4043.36	4.15253	4.37191	0.949821	0.0501792		HOMO	E14.75	1.35869	1322.97	1256.58	1289.78	1.05283	0.0528302		HOMO	E14.75	6110.57	5005.47
4653-K	HOMO	E14.75	3561.65	3652.21	0.975204	0.0247959	3606.93		HOMO	E14.75	3990.88	4100.85	0.973184	0.0268164	4045.87		HOMO	E14.75	960.66	892.97	926.815	1.0758	0.0758032		HOMO	E14.75	3927.78	4.08863	4.39856	0.929538	0.070462		HOMO	E14.75	1.39867	1343.65	1248.97	1296.31	1.0758	0.0758032		HOMO	E14.75	5658.83	5044.91
4618-I	HOMO	E14.75	3354.26	3150.94	1.06453	0.0645268	3252.6		HOMO	E14.75	3840.2	3901.71	0.984235	0.0157649	3870.95		HOMO	E14.75	821.92	863.42	842.67	0.951935	0.0480647		HOMO	E14.75	3952.21	4.80851	4.57739	1.05049	0.0504915		HOMO	E14.75	1.39002	1142.49	1200.18	1171.33	0.951935	0.0480647		HOMO	E14.75	5380.72	4521.19
4618-J	HOMO	E14.75	2771.26	3069.53	0.902829	0.0971712	2920.4		HOMO	E14.75	3712.8	3766.86	0.985649	0.0143515	3739.83		HOMO	E14.75	844.04	771.95	807.995	1.09339	0.0933869		HOMO	E14.75	3716.13	4.40279	4.81395	0.914589	0.0854106		HOMO	E14.75	1.47833	1247.77	1141.2	1194.48	1.09339	0.0933869		HOMO	E14.75	5528.71	4317.31
5058-G	HOMO	E15.25	4209.91	4486.76	0.938296	0.0617038	4348.34		HOMO	E15.25	5166.94	5084.75	1.01616	0.016164	5125.84		HOMO	E15.25	1025.41	937.38	981.395	1.09391	0.0939107		HOMO	E15.25	4772.23	4.65397	5.09103	0.914151	0.0858486		HOMO	E15.25	1.15117	1180.43	1079.09	1129.76	1.09391	0.0939107		HOMO	E15.25	5900.74	5005.69
5058-H	HOMO	E15.25	4384.32	4493.26	0.975755	0.0242452	4438.79		HOMO	E15.25	5068.05	5104.44	0.992871	0.00712909	5086.24		HOMO	E15.25	1104.95	1009.29	1057.12	1.09478	0.0947795		HOMO	E15.25	4747.01	4.29613	4.70332	0.913426	0.0865741		HOMO	E15.25	1.15729	1278.75	1168.04	1223.4	1.09478	0.0947795		HOMO	E15.25	5886.26	5136.97
		*ages in red font are litter defined ages even though the specific embryo appears to be slightly different developmentally (usally delayed slightly)
	SuperPlotsOfData - Plots Data and its Replicates								SuperPlotsOfData - Plots Data and its Replicates								SuperPlotsOfData - Plots Data and its Replicates								SuperPlotsOfData - Plots Data and its Replicates								SuperPlotsOfData - Plots Data and its Replicates									SuperPlotsOfData - Plots Data and its Replicates
	Ave mand - age connected								ave max-age connected								ave ear-age connected								interauric - age connected								normalized ear abs asymm									normalized max ave
		Condition	difference	95%CI_lo	95%CI_hi	p.value				Condition	difference	95%CI_lo	95%CI_hi	p.value				Condition	difference	95%CI_lo	95%CI_hi	p.value				Condition	difference	95%CI_lo	95%CI_hi	p.value				Condition	difference	95%CI_lo	95%CI_hi	p.value					Condition	difference	95%CI_lo	95%CI_hi	p.value
	1	WT vs HET	-247.97	-427.63	-68.32	0.0272016			1	WT vs HET	-174.05	-350.11	2.01	0.0510746			1	WT vs HET	-26.85	-130.91	77.21	0.382518			1	WT vs HET	-199.22	-534.55	136.11	0.124984			1	WT vs HET	0.03	0.01	0.06	0.0145889				1	WT vs HET	22.59	-107.75	152.93	0.72251
	2	WT vs HOMO	-1028.62	-1178.71	-878.52	0.00114814			2	WT vs HOMO	-1097.19	-1383.57	-810.81	0.00365982			2	WT vs HOMO	-286.71	-309.95	-263.48	0.0003545			2	WT vs HOMO	-781.53	-1332.22	-230.84	0.0257867			2	WT vs HOMO	0.03	0.01	0.06	0.0168865				2	WT vs HOMO	-345.15	-538.44	-151.85	0.00175274
	SuperPlotsOfData - Plots Data and its Replicates								SuperPlotsOfData - Plots Data and its Replicates								SuperPlotsOfData - Plots Data and its Replicates																SuperPlotsOfData - Plots Data and its Replicates									SuperPlotsOfData - Plots Data and its Replicates
	Mand abs asymm								Max abs asymm								ear abs asymm																normalized ave ear									normalized mand ave
		Condition	difference	95%CI_lo	95%CI_hi	p.value				Condition	difference	95%CI_lo	95%CI_hi	p.value				Condition	difference	95%CI_lo	95%CI_hi	p.value												Condition	difference	95%CI_lo	95%CI_hi	p.value					Condition	difference	95%CI_lo	95%CI_hi	p.value
	1	WT vs HET	0.01	-0.01	0.02	0.274351			1	WT vs HET	0.01	0	0.02	0.269789			1	WT vs HET	0.03	0.01	0.06	0.0145889											1	WT vs HET	9.03	-39.61	57.67	0.703897				1	WT vs HET	-76.95	-380.49	226.59	0.599845
	2	WT vs HOMO	0.04	0.01	0.07	0.00776351			2	WT vs HOMO	0.01	-0.01	0.03	0.160447			2	WT vs HOMO	0.03	0.01	0.06	0.0168865											2	WT vs HOMO	-126.91	-193.52	-60.3	0.00098247				2	WT vs HOMO	-445.2	-781.86	-108.54	0.0124337

## Sheet: Figure5E-H
Figure 5. In vivo analysis of Shroom3 zygosity in mice is associated with microtia and facial asymmetry.
Sample	sex	Geno	Age	right mand	left mand	ratio	abs asymm		Geno	Age	right max	left max	ratio	abs asymm		Geno	Age	right ear	left ear	ratio	abs asymm
157760	M	WT	E18.5	10079.8	10091.5	0.998833	0.00116732		WT	E18.5	6422.49	6384.98	1.00587	0.00587472		WT	E18.5	2553.74	2582.92	0.988703	0.0112973
159645	M	WT	E18.5	10532.1	10856.5	0.970124	0.0298761		WT	E18.5	6750.14	6981.79	0.966821	0.0331792		WT	E18.5	2753.98	2854.25	0.96487	0.0351301
170225	M	WT	E18.5	10539.3	10432.1	1.01028	0.0102808		WT	E18.5	6775.5	6690.05	1.01277	0.0127727		WT	E18.5	2778.32	2753.96	1.00885	0.00884544
175776	M	WT	E18.5	10160.6	10170.6	0.999008	0.00099207		WT	E18.5	6626.44	6670.23	0.993435	0.00656499		WT	E18.5	2717.1	2732.81	0.994251	0.00574866
170222	F	WT	E18.5	9727.04	9380.05	1.03699	0.0369923		WT	E18.5	6411.17	6350.39	1.00957	0.00957107		WT	E18.5	2649.39	2674.93	0.990452	0.00954791
175780	F	WT	E18.5	9982.37	9841.76	1.01429	0.0142871		WT	E18.5	6480.61	6282.72	1.0315	0.0314975		WT	E18.5	2713.17	2733.46	0.992577	0.00742283
612303	M	HOMO	E18.5	7776.2	7902.93	0.983964	0.0160358		HOMO	E18.5	5600.64	5587.88	1.00228	0.00228351		HOMO	E18.5	1994.11	2000.63	0.996741	0.00325897
612304	M	HOMO	E18.5	7993.93	7992.09	1.00023	0.000230228		HOMO	E18.5	5159.46	5152.36	1.00138	0.00137801		HOMO	E18.5	1824.11	2010.79	0.907161	0.0928391
612305	M	HOMO	E18.5	7996.67	8173.36	0.978382	0.0216178		HOMO	E18.5	5231.75	5258.12	0.994985	0.0050151		HOMO	E18.5	2085.51	2048.6	1.01802	0.0180172
612307	M	HOMO	E18.5	8237.55	8466.61	0.972945	0.0270545		HOMO	E18.5	5246.14	5690.31	0.921943	0.0780573		HOMO	E18.5	2050.43	2040.23	1.005	0.00499944
612306	F	HOMO	E18.5	7740.54	7057.56	1.09677	0.0967728		HOMO	E18.5	4744.56	5368.29	0.883812	0.116188		HOMO	E18.5	1965.8	1601.53	1.22745	0.227451
603497	F	HOMO	E18.5	8046.92	7981.66	1.00818	0.00817624		HOMO	E18.5	4528.76	4321.1	1.04806	0.0480572		HOMO	E18.5	1983.95	1910.95	1.0382	0.0382009
		Sample average measurements: (left+right)/2
		Geno	Age	ave mand	ave max	ave ear				hindlimb	base	normalization
		WT	E18.5	10085.6	6403.73	2568.33				5220.32	5394.07	1.03328
		WT	E18.5	10694.3	6865.97	2804.11				5394.07	5394.07	1
		WT	E18.5	10485.7	6732.77	2766.14				5374.52	5394.07	1.00364
		WT	E18.5	10165.6	6648.33	2724.95				5334.23	5394.07	1.01122
		WT	E18.5	9553.55	6380.78	2662.16				4856.22	5394.07	1.11075
		WT	E18.5	9912.07	6381.66	2723.32				5146.87	5394.07	1.04803
		HOMO	E18.5	7839.57	5594.26	1997.37				4923.56	5394.07	1.09556
		HOMO	E18.5	7993.01	5155.91	1917.45				4598.06	5394.07	1.17312
		HOMO	E18.5	8085.01	5244.93	2067.06				4570.82	5394.07	1.18011
		HOMO	E18.5	8352.08	5468.23	2045.33				4644.31	5394.07	1.16144
		HOMO	E18.5	7399.05	5056.43	1783.66				4425.02	5394.07	1.21899
		HOMO	E18.5	8014.29	4424.93	1947.45				4479.22	5394.07	1.20424
		Sample average measurements - Normalized to hindlimb foot length
		Geno	Age	norm mand	norm max	norm ear
		WT	E18.5	10421.3	6616.87	2653.81
		WT	E18.5	10694.3	6865.97	2804.11
		WT	E18.5	10523.8	6757.27	2776.2
		WT	E18.5	10279.6	6722.92	2755.52
		WT	E18.5	10611.6	7087.48	2957.01
		WT	E18.5	10388.1	6688.17	2854.11
		HOMO	E18.5	8588.74	6128.86	2188.24
		HOMO	E18.5	9376.75	6048.49	2249.4
		HOMO	E18.5	9541.21	6189.6	2439.35
		HOMO	E18.5	9700.41	6350.99	2375.52
		HOMO	E18.5	9019.39	6163.75	2174.28
		HOMO	E18.5	9651.15	5328.69	2345.2
		normalized % diff		93.8861	79.2616	85.1092
