# Supplementary material for: Commoncis-regulatory variation modifies the penetrance of pathogenicSHROOM3variants in craniofacial microsomia
Source: HighWire-hosted journal article supplement (doi:10.1101/gr.280047.124), 2025-04-15
Supplement: Supplemental_Table_S1.xlsx [file Supplemental_Table_S1.xlsx]

## Sheet: S.Table 1
Supplementary Table 1. All likely pathogenic variants in SHROOM3 for CFM patients from Chinese, European, and Hispanic.
ID	Chr	Start	End	Ref	Alt	RefSeq	Exon	mRNA change	AA change	Allele frequency			Allele freqeuncy in East Asian				Deleterious prediction					Conservation			Domain	Count	Novel	Model	Populations
										GnomAD	ExAC	1KG	GnomAD	ExAC	1KG	SG10K	SIFT	Polyphen2	|ESM|	Alphamissense	CADD	GERP++	phyloP100way_vertebrate	phastCons100way_vertebrate
rs751596690	Chr4	76436057	76436057	T	G	NM_020859	exon1	c.T5G	p.M2R	1.972e-05	0.0002	.	0.0004	0.0027	.	0.000381	D	D	2.06	benign	27.2	4.19	2.563	1	.	5	NO		CCFM
rs767412535	Chr4	76436197	76436197	G	A	NM_020859	exon1	c.G145A	p.G49R	6.573e-06	1.647e-05	.	.	0.0001	.	.	T	D	6.55	benign	25.6	5.44	6.546	1	PDZ	1	NO		CCFM
rs144435434	Chr4	76555619	76555619	G	T	NM_020859	exon2	c.G179T	p.G60V	0.0015	0.002	0.000998403	0.0017	0.0023	.	.	D	D	10.74	pathogenic	24.9	4.95	6.338	1	PDZ	1	NO	eQTL-P	GMKF
.	Chr4	76555718	76555718	C	T	NM_020859	exon2	c.C278T	p.S93F	.	.	.	.	.	.	.	D	D	7.7	ambiguous	24.7	4.6	2.782	1	PDZ	1	YES	eQTL-P	CCFM
rs747862563	Chr4	76555759	76555759	C	T	NM_020859	exon2	c.C319T	p.R107C	3.287e-05	1.683e-05	.	0.0002	0.0002	.	0.0001905	D	D	7.66	ambiguous	33	3.57	3.942	1	PDZ	1	NO		CCFM
rs149028713	Chr4	76555760	76555760	G	A	NM_020859	exon2	c.G320A	p.R107H	2.63e-05	2.534e-05	0.000199681	0.0002	0.0002	0.001	.	D	D	8.3	ambiguous	31	4.44	5.105	1	PDZ	2	NO		CCFM
rs745343928	Chr4	76710251	76710251	C	T	NM_020859	exon3	c.C419T	p.A140V	.	8.268e-06	.	.	.	.	.	D	P	4.09	benign	19.04	4.21	2.872	0.224	.	2	NO		CCFM
rs540863066	Chr4	76710265	76710265	G	T	NM_020859	exon3	c.G433T	p.V145F	6.573e-06	.	.	.	.	.	.	D	D	4.46	benign	26.1	4.96	2.935	1	.	1	NO		CCFM
rs746778402	Chr4	76730823	76730823	C	T	NM_020859	exon4	c.C475T	p.R159X	1.239e-06	8e-06	.	0	0	.	.	.	.			40	4.87	2.492	1	.	1	NO		FaceBase
rs192760386	Chr4	76730868	76730868	G	A	NM_020859	exon4	c.G520A	p.D174N	1.972e-05	1.647e-05	0.000199681	.	.	.	.	D	P	4.34	benign	23.2	4.67	5.539	1	.	2	NO		CCFM
.	Chr4	76730928	76730928	C	A	NM_020859	exon4	c.C580A	p.H194N	.	.	.	.	.	.	.	D	D	5.75	benign	29.2	5.52	3.902	1	.	1	YES		CCFM
.	Chr4	76738924	76738924	C	T	NM_020859	exon5	c.C751T	p.H251Y	.	.	.	.	.	.	.	D	P	5.91	benign	23.2	5.06	1.75	0.998	.	1	YES		CCFM
rs746996342	Chr4	76739011	76739011	C	T	NM_020859	exon5	c.C838T	p.R280W	6.571e-06	1.648e-05	.	.	.	.	.	D	D	5.83	benign	25.9	5.06	1.052	0.459	.	1	NO		CCFM
rs199685557	Chr4	76739113	76739113	C	T	NM_020859	exon5	c.C940T	p.R314W	5.256e-05	2.474e-05	.	0.0008	0.0003	.	0.001333	D	D	6.1	benign	24.2	3.22	2.599	0.982	.	1	NO	eQTL-P	CCFM
.	Chr4	76739199	76739199	G	C	NM_020859	exon5	c.G1026C	p.Q342H	.	.	.	.	.	.	.	D	D	3.63	benign	11.9	5.34	0.403	0	.	1	YES		CCFM
rs200056000	Chr4	76739350	76739350	G	A	NM_020859	exon5	c.G1177A	p.A393T	6.57e-05	1.666e-05	.	0.0002	0.0001	.	.	T	P	9.64	benign	15.39	3.89	2.925	0.98	.	1	NO		CCFM
.	Chr4	76739387	76739387	C	G	NM_020859	exon5	c.C1214G	p.S405C	.	.	.	.	.	.	0.0001905	D	D	7.38	benign	26	5.63	5.84	1	.	2	NO		CCFM
rs79007254	Chr4	76739414	76739414	G	A	NM_020859	exon5	c.G1241A	p.R414Q	0.0001	7.466e-05	0.000199681	0.0027	0.0005	0.001	.	D	P	3.39	benign	24.8	5.25	3.176	0.997	.	2	NO		CCFM/OAVS
rs764124002	Chr4	76739581	76739581	G	C	NM_020859	exon5	c.G1408C	p.V470L	1.972e-05	8.241e-06	.	0.0002	0.0001	.	.	D	D	3.32	ambiguous	24	5.49	8.052	1	.	3	NO		CCFM
.	Chr4	76739834	76739834	C	T	NM_020859	exon5	c.C1661T	p.P554L	.	.	.	.	.	.	.	T	B	4.78	benign	21.2	5.51	1.572	0.075	.	2	YES		CCFM
rs200458578	Chr4	76739881	76739881	T	A	NM_020859	exon5	c.T1708A	p.S570T	6.574e-06	.	0.000199681	0.0002	.	0.001	.	D	D	3.99	benign	5.705	4.42	1.019	0.176	.	1	NO		CCFM
rs182065647	Chr4	76740166	76740166	C	G	NM_020859	exon5	c.C1993G	p.L665V	1.971e-05	5.869e-05	0.000399361	0.0006	0.0008	0.002	.	D	D	5.86	benign	24.3	4.8	0.884	0.446	.	1	NO		CCFM
.	Chr4	76740400	76740400	G	A	NM_020859	exon5	c.G2227A	p.E743K	1.314e-05	.	.	.	.	.	.	T	P	5.83	benign	16.84	3.83	2.363	0.547	.	1	NO	eQTL-P	GMKF
.	Chr4	76740415	76740415	C	A	NM_020859	exon5	c.C2242A	p.P748T	6.572e-06	.	.	0.0002	.	.	.	D	P	4.69	benign	9.481	0.985	1.096	0	.	1	NO		CCFM
rs750545101	Chr4	76740416	76740416	C	G	NM_020859	exon5	c.C2243G	p.P748R	.	1.757e-05	.	.	0.0002	.	0.00019	D	D	4.02	benign	23.3	4.8	0.706	0	.	2	NO		CCFM
.	Chr4	76740419	76740454	CGCACCCGCACACATCCAGTCTGGGCCGGAGGGGGC	-	NM_020859	exon5	c.2246_2281del	p.H750_P761del	.	.	.	.	.	.	.	.	.	.	.	.	.	.	.	.	1	YES		CCFM
rs1026497436	Chr4	76740445	76740445	C	T	NM_020859	exon5	c.C2272T	p.R758W	2.629e-05	.	.	.	.	.	0.0001905	D	B	6.5	benign	16.47	0.5	0.328	0	.	1	NO		GMKF
.	Chr4	76740538	76740538	G	A	NM_020859	exon5	c.G2365A	p.E789K	6.57e-06	.	.	.	.	.	.	D	D	11.2	pathogenic	26.8	4.8	9.464	1	.	1	NO	eQTL-P	CCFM
rs190661132	Chr4	76740543	76740543	G	C	NM_020859	exon5	c.G2370C	p.Q790H	6.569e-06	.	0.000199681	0.0002	.	0.001	.	D	D	5.79	benign	23.1	0.928	0.455	1	.	1	NO		CCFM
.	Chr4	76740704	76740704	G	A	NM_020859	exon5	c.G2531A	p.G844E	.	.	.	.	.	.	0.00019	D	D	4.3	benign	5.465	2.64	1.19	0.971	.	1	NO		CCFM
.	Chr4	76740820	76740820	G	C	NM_020859	exon5	c.G2647C	p.A883P	.	.	.	.	.	.	.	D	B	3.6	benign	5.412	-4.19	-0.032	0	.	1	YES		CCFM
.	Chr4	76741094	76741094	C	T	NM_020859	exon5	c.C2921T	p.S974L	.	.	.	.	.	.	.	D	B	5.32	benign	9.419	1.03	0.127	0	ASD1	1	YES	eQTL-P	GMKF
rs780547270	Chr4	76741361	76741361	G	C	NM_020859	exon5	c.G3188C	p.R1063P	2.628e-05	2.71e-05	.	0.0001	0.0003	.	.	D	D	10.6	ambiguous	26.2	4.85	0.905	0.51	ASD1	1	NO	eQTL-P	GMKF
.	Chr4	76741475	76741520	CCGCCGGCTGCAGCCTCCAGGAGCCCGGGCCACTGCGTGAGCGCGC	-	NM_020859	exon5	c.3302_3347del	p.A1102Rfs*23	.	.	.	.	.	.	.	.	.	.	.	.	.	.	.	.	1	YES	eQTL-P	CCFM
.	Chr4	76741541	76741567	CCGGCCCCGCGGCGCTCGAAGGCTCCG	CTCCAGCTC	NM_020859	exon5	c.3368_3394delinsCTCCAGCTC	p.G1124_G1132delinsPAR	.	.	.	.	.	.	.	.	.	.	.	.	.	.	.	.	1	YES		CCFM
.	Chr4	76741543	76741543	G	C	NM_020859	exon5	c.G3370C	p.G1124R	.	.	.	.	.	.	.	D	B	4.43	benign	23.3	2.37	0.812	0.002	.	1	NO		GMKF
rs375832980	Chr4	76741681	76741681	C	T	NM_020859	exon5	c.C3508T	p.R1170C	0.0002	7.853e-05	.	0.0023	0.0029	.	0.001143	D	D	7.67	benign	33	4.26	2.368	0.98	.	1	NO		CCFM
.	Chr4	76741690	76741690	T	A	NM_020859	exon5	c.T3517A	p.S1173T	.	.	.	.	.	.	0.0001905	D	B	6.99	benign	23.4	3.91	2.975	1	.	1	NO		CCFM
.	Chr4	76741847	76741847	T	C	NM_020859	exon5	c.T3674C	p.L1225P	.	.	.	.	.	.	.	D	D	11.79	pathogenic	26.1	5.34	7.487	1	.	1	YES		CCFM
rs181194611	Chr4	76741904	76741904	C	T	NM_020859	exon5	c.C3731T	p.P1244L	7.885e-05	0.0002	0.000599042	0.0021	0.0032	0.003	0.002476	D	D	10.95	ambiguous	28.4	5.48	7.311	1	.	13	NO		CCFM
rs1050955462	Chr4	76754589	76754589	A	G	NM_020859	exon7	c.A4106G	p.Q1369R	3.943e-05	.	.	0.0004	.	.	.	T	D	3.73	benign	5.496	4.51	0.53	0.001	.	1	NO		CCFM
.	Chr4	76754658	76754658	A	G	NM_020859	exon7	c.A4175G	p.H1392R	.	.	.	.	.	.	.	D	B	2.78	benign	11.81	1.74	0.46	0	.	1	YES		CCFM
.	Chr4	76754670	76754670	A	T	NM_020859	exon7	c.A4187T	p.Q1396L	.	.	.	.	.	.	.	D	D	2.74	benign	25.1	4.2	1.4	0.936	.	1	YES		CCFM
.	Chr4	76754756	76754756	T	G	NM_020859	exon7	c.T4273G	p.W1425G	.	.	.	.	.	.	.	D	B	0.06	benign	0.571	-2.39	-0.183	0.001	.	1	YES		CCFM
rs147919147	Chr4	76755001	76755001	C	G	NM_020859	exon7	c.C4518G	p.D1506E	7.231e-05	3.321e-05	.	.	0	.	.	D	D	2.57	ambiguous	23	-5.49	-2.56	0.003	.	1	NO		GMKF
rs142505732	Chr4	76756597	76756597	G	A	NM_020859	exon8	c.G4858A	p.V1620I	0.0006	0.0004	0.000399361	0.0002	0.0006	0.001	.	D	B	4.18	benign	2.787	0.898	-0.129	0	.	2	NO		CCFM
.	Chr4	76770802	76770802	C	G	NM_020859	exon10	c.C5526G	p.D1842E	.	.	.	.	.	.	0.00019	T	D	5.02	ambiguous	29.4	5.53	0.99	1	ASD2	1	NO		CCFM
.	Chr4	76770821	76770821	C	T	NM_020859	exon10	c.C5545T	p.L1849F	.	.	.	.	.	.	.	D	D	11.34	pathogenic	33	5.53	6.174	1	ASD2	1	YES	eQTL-P	CCFM
.	Chr4	76778885	76778885	G	T	NM_020859	exon11	c.G5699T	p.R1900L	.	.	.	.	.	.	.	D	D	11.52	pathogenic	29.5	4.34	9.532	1	ASD2	1	YES	eQTL-P	CCFM
rs768722873	Chr4	76778894	76778894	G	A	NM_020859	exon11	c.G5708A	p.R1903Q	3.943e-05	1.648e-05	.	0.0004	.	.	.	D	D	7.26	benign	27.9	5.18	7.74	1	ASD2	2	NO	eQTL-P	CCFM
rs267600266	Chr4	76779112	76779112	G	A	NM_020859	exon11	c.G5926A	p.E1976K	6.571e-06	.	.	0.0002	.	.	0.00019	D	B	3.08	benign	19.18	0.785	0.516	0.005	.	1	NO		CCFM
Ref/ALT: Reference and alternative allele; AA change: Amino acid change; Count: number of CFM patients; SIFT: Sorting Intolerant From Tolerant; Polyphen2: Polymorphism Phenotyping v2; CADD: Combined Annotation-Dependent Depletion; 1KG: 1000 genomes project; GnomAD: The Genome Aggregation Database; SG10K pilot: the pilot data of Singapore National Precision Medicine programme; Domain: Protein doma…
