# Supplementary material for: Commoncis-regulatory variation modifies the penetrance of pathogenicSHROOM3variants in craniofacial microsomia
Source: HighWire-hosted journal article supplement (doi:10.1101/gr.280047.124), 2025-04-15
Supplement: Supplemental_Table_S2.xlsx [file Supplemental_Table_S2.xlsx]

## Sheet: S.Table 2
Supplementary Table 2. The deleterious variants identified from 2,625 controls used in this study.
SNP ID	Chr	Start	End	Ref	Alt	Func.refGene	Exon	mRNA change	AA change	Allele frequency			Allele frequency in East Asian			Deleterious prediction					Conservation			Interpro_domain	Model
										ExAC	1000G	gnomad	ExAC	1000G	gnomad	SIFT	Polyphen2	CADD	|ESM|	AlphaMissense	GERP++	phyloP	phastCons
rs751596690	Chr4	76436057	76436057	T	G	NM_020859	exon1	c.T5G	p.M2R	0.0002	.	1.972e-05	0.0027	.	0.0004	D	D	27.2	2.06	benign	4.19	2.563	1	.
.	Chr4	76555744	76555744	C	G	NM_020859	exon2	c.C304G	p.L102V	.	.	.	.	.	.	D	D	28	9.07	pathogenic	4.44	5.865	1	PDZ domain	eQTL-P
rs747862563	Chr4	76555759	76555759	C	T	NM_020859	exon2	c.C319T	p.R107C	1.683e-05	.	3.287e-05	0.0002	.	0.0002	D	D	33	7.66	ambiguous	3.57	3.942	1	PDZ domain
rs757040989	Chr4	76730824	76730824	G	A	NM_020859	exon4	c.G476A	p.R159Q	4.12e-05	.	1.315e-05	0	.	0	T	D	27.5	6.71	benign	4.88	6.713	1	.
rs377199268	Chr4	76738870	76738870	C	A	NM_020859	exon5	c.C697A	p.P233T	0.0001	.	7.227e-05	0.0015	.	0.0019	D	D	23	4.08	benign	4.35	2.672	0.984	.
rs199685557	Chr4	76739113	76739113	C	T	NM_020859	exon5	c.C940T	p.R314W	2.474e-05	.	5.256e-05	0.0003	.	0.0008	D	D	24.2	6.1	benign	3.22	2.599	0.982	.
rs191638826	Chr4	76739180	76739180	G	C	NM_020859	exon5	c.G1007C	p.R336P	2.479e-05	0.000199681	1.314e-05	0.0003	0.001	0.0004	D	D	21.4	3.02	benign	2.67	0.224	0.018	.
rs749869702	Chr4	76739273	76739273	G	C	NM_020859	exon5	c.G1100C	p.S367T	4.98e-05	.	1.971e-05	0.0007	.	0.0006	D	B	4.062	4.57	benign	5.07	1.865	0.015	.
rs754893564	Chr4	76739365	76739365	C	T	NM_020859	exon5	c.C1192T	p.R398C	2.497e-05	.	1.971e-05	0	.	0.0002	D	D	27.5	8.59	benign	3.56	3.156	0.854	.
.	Chr4	76739387	76739387	C	G	NM_020859	exon5	c.C1214G	p.S405C	.	.	.	.	.	.	D	D	26	7.38	benign	5.63	5.84	1	.
rs750545101	Chr4	76740416	76740416	C	G	NM_020859	exon5	c.C2243G	p.P748R	1.757e-05	.	.	0.0002	.	.	D	D	23.3	4.02	benign	4.8	0.706	0	.
rs1026497436	Chr4	76740445	76740445	C	T	NM_020859	exon5	c.C2272T	p.R758W	.	.	2.629e-05	.	.	0	D	B	16.47	6.5	benign	0.5	0.328	0	.
rs758860061	Chr4	76740520	76740520	G	C	NM_020859	exon5	c.G2347C	p.E783Q	8.377e-06	.	.	0.0001	.	.	D	P	22.9	7.2	benign	4.81	6.392	1	.
.	Chr4	76740704	76740704	G	A	NM_020859	exon5	c.G2531A	p.G844E	.	.	.	.	.	.	D	D	5.465	4.3	benign	2.64	1.19	0.971	.
rs766602917	Chr4	76741387	76741387	A	C	NM_020859	exon5	c.A3214C	p.S1072R	0.0001	.	3.942e-05	0.0021	.	0.0012	D	D	22.8	9.44	ambiguous	-0.441	2.046	0.956	.
rs375832980	Chr4	76741681	76741681	C	T	NM_020859	exon5	c.C3508T	p.R1170C	7.853e-05	.	0.0002	0.0029	.	0.0023	D	D	33	7.67	benign	4.26	2.368	0.98	.
.	Chr4	76741690	76741690	T	A	NM_020859	exon5	c.T3517A	p.S1173T	.	.	.	.	.	.	D	B	23.4	6.99	benign	3.91	2.975	1	.
.	Chr4	76741894	76741894	A	G	NM_020859	exon5	c.A3721G	p.R1241G	.	.	.	.	.	.	D	D	23.5	10.2	pathogenic	0.522	2.208	0.999	.
rs181194611	Chr4	76741904	76741904	C	T	NM_020859	exon5	c.C3731T	p.P1244L	0.0002	0.000599042	7.885e-05	0.0032	0.003	0.0021	D	D	28.4	10.95	ambiguous	5.48	7.311	1	.
.	Chr4	76754327	76754327	G	C	NM_020859	exon7	c.G3844C	p.E1282Q	.	.	.	.	.	.	D	P	20.2	2.77	benign	3.13	2.12	0.988	.
rs186087127	Chr4	76754396	76754396	A	G	NM_020859	exon7	c.A3913G	p.K1305E	1.649e-05	0.000199681	1.314e-05	0.0002	0.001	0.0002	D	B	14.24	2.99	benign	4.44	3.722	0.998	.
.	Chr4	76754430	76754430	G	A	NM_020859	exon7	c.G3947A	p.C1316Y	.	.	.	.	.	.	D	P	16.58	4.11	benign	2.07	1.335	0.633	.
rs758848336	Chr4	76755027	76755027	C	T	NM_020859	exon7	c.C4544T	p.P1515L	1.683e-05	.	1.314e-05	0.0002	.	0.0004	T	B	15.64	3.92	benign	3.53	1.541	0.011	.
rs752151821	Chr4	76755185	76755185	C	T	NM_020859	exon7	c.C4702T	p.R1568C	1.827e-05	.	1.315e-05	0	.	0.0002	D	B	12.79	4.62	benign	-4.99	-1.225	0	.
.	Chr4	76756468	76756468	G	T	NM_020859	exon8	c.G4729T	p.V1577L	.	.	.	.	.	.	D	B	9.614	2.91	benign	3.13	0.3	0.53	.
rs761271747	Chr4	76756582	76756582	C	A	NM_020859	exon8	c.C4843A	p.P1615T	8.238e-06	.	6.591e-06	0.0001	.	0.0002	D	B	0.422	4	benign	-6.11	-0.435	0	.
rs878908761	Chr4	76756853	76756853	G	A	NM_020859	exon8	c.G5114A	p.R1705Q	.	.	6.574e-06	.	.	0	T	B	19.62	2.41	benign	2.05	1.238	0.186	Apx/Shrm Domain 2
.	Chr4	76770698	76770698	A	G	NM_020859	exon10	c.A5422G	p.I1808V	.	.	.	.	.	.	T	P	21.5	3.69	benign	5.54	1.412	1	Apx/Shrm Domain 2
rs370199969	Chr4	76770703	76770703	G	T	NM_020859	exon10	c.G5427T	p.K1809N	3.295e-05	.	6.57e-06	0.0005	.	0.0002	D	D	24.1	5.36	ambiguous	1.87	1.313	1	Apx/Shrm Domain 2
rs764638544	Chr4	76770809	76770809	G	A	NM_020859	exon10	c.G5533A	p.V1845I	8.238e-06	.	6.57e-06	0.0001	.	0.0002	D	D	33	8.51	benign	5.53	10.003	1	Apx/Shrm Domain 2
.	Chr4	76778992	76778992	C	T	NM_020859	exon11	c.C5806T	p.R1936W	.	.	.	.	.	.	D	D	35	9.7	pathogenic	4.72	7.514	1	Apx/Shrm Domain 2	eQTL-P
rs267600266	Chr4	76779112	76779112	G	A	NM_020859	exon11	c.G5926A	p.E1976K	.	.	6.571e-06	.	.	0.0002	D	B	19.18	3.08	benign	0.785	0.516	0.005	.
Ref/ALT: Reference and alternative allele; AA change: Amino acid change; Count: number of CFM patients; SIFT: Sorting Intolerant From Tolerant; Polyphen2: Polymorphism Phenotyping v2; CADD: Combined Annotation-Dependent Depletion; 1KG: 1000 genomes project; GnomAD: The Genome Aggregation Database; SG10K pilot: the pilot data of Singapore National Precision Medicine programme; Domain: Protein doma…
