# Supplementary material for: Commoncis-regulatory variation modifies the penetrance of pathogenicSHROOM3variants in craniofacial microsomia
Source: HighWire-hosted journal article supplement (doi:10.1101/gr.280047.124), 2025-04-15
Supplement: Supplemental_Table_S3.xlsx [file Supplemental_Table_S3.xlsx]

## Sheet: S. Table 3
Supplemetary Table 3. The phenotype difference between deleterious variants carriers and all CFM patients
Phenotype	65 deleterious variants carriers		All CFM patients (1995 of 2009)
	Count	Percent	Count	Percent
Gender
Male	49	0.753846	1587	0.795489
Female	16	0.246154	408	0.204511
Age
Range	5~31	-	5~41	-
Median	9	-	9	-
Laterality
Left	21	0.323077	748	0.374937
Right	38	0.584615	1127	0.564912
Double	6	0.0923077	120	0.0601504
Nagata
Anotia	5	0.0757576	36	0.0180451
Lobule type	10	0.151515	1412	0.707769
Small conchal type	34	0.515152	335	0.16792
Conchal type	17	0.257576	212	0.106266
External auditory meatus of affected-side
Atresia	46	0.686567	1575	0.789474
Stricture	21	0.313433	420	0.210526
OMENS
O0	33	0.515625	1499	0.749875
O1	22	0.34375	312	0.156078
O2	5	0.078125	132	0.066033
O3	4	0.0625	56	0.028014
M0	9	0.136364	95	0.047619
M1	30	0.454545	992	0.497243
M2a	15	0.227273	720	0.360902
M2b	7	0.106061	172	0.0862155
M3	5	0.0757576	16	0.00802005
E0	0	0	0	0
E1	0	0	8	0
E2	8	0.123077	220	0.11072
E3	57	0.876923	1767	0.88928
S0	31	0.476923	119	0.0596491
S1	18	0.276923	1280	0.641604
S2	10	0.153846	520	0.260652
S3	6	0.0923077	76	0.0380952
