# Supplementary material for: Commoncis-regulatory variation modifies the penetrance of pathogenicSHROOM3variants in craniofacial microsomia
Source: HighWire-hosted journal article supplement (doi:10.1101/gr.280047.124), 2025-04-15
Supplement: Supplemental_Table_S4.xlsx [file Supplemental_Table_S4.xlsx]

## Sheet: S. Table 4
Supplementary Table 4. Significant associated SNVs to CFM in SHROOM3
SNP ID	Position	Alternative allele	Allele frequency		OR	P	Function	MAF in East Asian			GTEx
			CFM	Control				ExAC	1KG	GnomAD	P	NES	Tissue
rs1912831	4:76358127	T	0.1976	0.2486	0.7445	6.3e-09	intronic	.	0.246	0.2329	.	.	.
rs137864783	4:76424126	T	0.1916	0.2442	0.7338	1.55e-09	intergenic	.	0.2391	0.2234	.	.	.
rs149455317	4:76424127	T	0.1919	0.2442	0.7349	1.87e-09	intergenic	.	0.2391	0.2233	.	.	.
rs77238048	4:76428355	A	0.1989	0.2467	0.7581	4.92e-08	intergenic	.	0.2371	0.227	.	.	.
rs143792248	4:76428649	GAT	0.1941	0.2446	0.7441	7.28e-09	intergenic	.	0.2371	0.2271	.	.	.
rs74918804	4:76435387	GC	0.1777	0.2345	0.7055	2.9e-11	UTR5	.	0.2212	0.2102	.	.	.
rs34004070	4:76435768	G	0.2459	0.3021	0.7533	2.14e-09	UTR5	.	0.2788	0.2694	.	.	.
rs189707263	4:76436345	T	0.1687	0.2251	0.6986	1.84e-11	intronic	.	0.2113	0.2011	.	.	.
rs10006043	4:76436594	T	0.3109	0.3695	0.7696	3.81e-09	intronic	.	0.3651	0.347	.	.	.
rs10027712	4:76436625	A	0.173	0.2276	0.7097	9.76e-11	intronic	.	0.2113	0.2009	.	.	.
rs34496254	4:76437273	A	0.171	0.2276	0.6999	1.86e-11	intronic	.	0.2113	0.2	.	.	.
rs12647876	4:76437864	C	0.1645	0.2181	0.7059	1.09e-10	intronic	.	0.2034	0.1915	.	.	.
rs11097355	4:76438522	C	0.173	0.2276	0.7097	9.76e-11	intronic	.	0.2113	0.1992	.	.	.
rs11097356	4:76438524	T	0.173	0.2276	0.7097	9.76e-11	intronic	.	0.2113	0.1995	.	.	.
rs11737407	4:76438636	A	0.1712	0.2272	0.7026	3.06e-11	intronic	.	0.2123	0.2005	.	.	.
rs66466813	4:76439053	T	0.175	0.2276	0.7196	4.81e-10	intronic	.	0.2113	0.201	.	.	.
rs28722184	4:76439083	A	0.176	0.2276	0.7246	1.04e-09	intronic	.	0.2113	0.2007	.	.	.
rs66785096	4:76439833	A	0.1742	0.2276	0.7159	2.67e-10	intronic	.	0.2113	0.2009	.	.	.
rs11736785	4:76440368	C	0.1737	0.2276	0.7134	1.79e-10	intronic	.	0.2133	0.2008	.	.	.
rs11723217	4:76440454	A	0.1745	0.2276	0.7171	3.25e-10	intronic	.	0.2133	0.2013	.	.	.
rs12651108	4:76490843	T	0.2414	0.2928	0.7688	3.49e-08	intronic	.	0.2599	0.2598	.	.	.
rs12710873	4:76520535	A	0.2626	0.317	0.7673	1.21e-08	intronic	.	0.3145	0.3005	.	.	.
rs10002311	4:76521351	C	0.2618	0.3181	0.7603	3.76e-09	intronic	.	0.3155	0.3019	.	.	.
rs35614432	4:76523108	A	0.2611	0.3156	0.7661	1.05e-08	intronic	.	0.3155	0.3003	.	.	.
rs79532599	4:76525400	C	0.2606	0.3206	0.7469	3.41e-10	intronic	.	0.3175	0.3041	.	.	.
.	4:76525528	C	0.3512	0.407	0.7884	4.15e-08	intronic	.	.	.	.	.	.
rs62300887	4:76525609	G	0.2648	0.3213	0.7607	3.58e-09	intronic	.	0.3194	0.3057	.	.	.
rs10050141	4:76530384	A	0.2705	0.3326	0.7443	1.32e-10	intronic	.	0.3333	0.3166	.	.	.
rs10004356	4:76543872	A	0.3066	0.3825	0.714	3.21e-14	intronic	.	0.375	0.3524	.	.	.
rs10027450	4:76543921	T	0.2616	0.3158	0.7674	1.28e-08	intronic	.	0.3105	0.2945	.	.	.
rs4544731	4:76544608	G	0.03136	0.06667	0.4532	2.32e-14	intronic	.	0.0645	0.0573	3e-06	-0.36	Brain - Cerebellum
rs3923380	4:76547441	A	0.3925	0.4627	0.7503	1.39e-11	intronic	.	.	.	1e-05	0.32	Brain - Cerebellum
rs7654608	4:76548753	A	0.4915	0.4242	1.312	1.09e-10	intronic	.	.	.	1.8e-08	-0.21	Muscle - Skeletal
rs10005964	4:76549147	A	0.3783	0.4598	0.7149	3.61e-15	intronic	.	0.4385	0.4071	7.5e-08	-0.4	Brain - Cerebellum
rs9995957	4:76549429	C	0.5007	0.4272	1.345	1.96e-12	intronic	.	.	.	1.4e-08	-0.21	Muscle - Skeletal
rs9998347	4:76549437	C	0.3721	0.4581	0.701	9.36e-17	intronic	.	0.4385	0.405	8.8e-09	-0.42	Brain - Cerebellum
rs1962206	4:76549615	T	0.3932	0.4579	0.7672	4.59e-10	intronic	.	.	.	8.8e-09	0.42	Brain - Cerebellum
rs13120833	4:76549963	C	0.4938	0.4263	1.313	1.01e-10	intronic	.	.	.	1.4e-08	-0.21	Muscle - Skeletal
rs62300889	4:76550486	G	0.3808	0.4577	0.7286	1.12e-13	intronic	.	0.4385	0.4048	8.8e-09	-0.42	Brain - Cerebellum
rs12644803	4:76550765	A	0.3783	0.4577	0.7209	1.74e-14	intronic	.	0.4395	0.4054	7.5e-08	-0.4	Brain - Cerebellum
rs62300890	4:76550879	G	0.3751	0.4579	0.7105	1.22e-15	intronic	.	0.4395	0.408	8.8e-09	-0.42	Brain - Cerebellum
rs67660658	4:76551024	A	0.3706	0.4573	0.6986	5.02e-17	intronic	.	0.4395	0.4069	7.5e-08	-0.4	Brain - Cerebellum
rs62300891	4:76551518	T	0.03783	0.064	0.575	2.27e-08	intronic	.	0.0685	0.0553	8.6e-12	-0.49	Brain - Cerebellum
rs6532475	4:76552676	A	0.4009	0.5175	0.624	7.34e-29	intronic	.	0.498	0.4887	.	.	.
rs59390336	4:76553207	C	0.04032	0.07333	0.5309	2.33e-11	intronic	.	0.0744	0.0591	7.7e-15	-0.56	Brain - Cerebellum
rs6812051	4:76569817	G	0.3109	0.3954	0.6896	4.01e-17	intronic	.	0.37	0.3429	9.4e-11	-0.47	Brain - Cerebellar Hemisphere
rs6824297	4:76571002	G	0.3741	0.3181	1.281	1.83e-08	intronic	.	.	.	6.2e-22	-0.36	Muscle - Skeletal
rs143035086	4:76573411	C	0.03932	0.06933	0.5494	5.29e-10	intronic	.	0.0675	0.0578	.	.	.
rs12108253	4:76573468	C	0.2501	0.3265	0.6881	1.24e-15	intronic	.	0.3026	0.2858	5.8e-08	0.16	Skin - Sun Exposed (Lower leg)
rs12509930	4:76574418	G	0.04405	0.07124	0.6008	4.14e-08	intronic	.	0.0675	0.0571	3.9e-18	-0.63	Brain - Cerebellum
rs12513013	4:76577083	C	0.04256	0.07105	0.5812	7.37e-09	intronic	.	0.0675	0.057	9.1e-16	-0.56	Brain - Cerebellum
rs57756059	4:76579643	G	0.5406	0.4638	1.36	2.41e-13	intronic	.	.	.	4.4e-15	-0.57	Brain - Cerebellar Hemisphere
rs17002091	4:76579794	G	0.2476	0.3084	0.7382	1.19e-10	intronic	.	0.2827	0.2633	1.5e-07	0.16	Skin - Sun Exposed (Lower leg)
rs12503111	4:76581967	G	0.2962	0.3775	0.6938	2.83e-16	intronic	.	0.3552	0.3212	2e-17	-0.59	Brain - Cerebellum
rs146513783	4:76582192	TAGAAA	0.2959	0.377	0.6947	3.62e-16	intronic	.	0.3552	0.3166	2e-17	-0.59	Brain - Cerebellum
rs13148163	4:76583247	C	0.4002	0.4674	0.7602	1.02e-10	intronic	.	0.4256	0.4117	1.2e-17	-0.32	Muscle - Skeletal
rs28588711	4:76583499	T	0.2992	0.3771	0.7049	4.65e-15	intronic	.	0.3552	0.322	1.9e-17	-0.58	Brain - Cerebellum
rs28454965	4:76583914	A	0.2999	0.377	0.708	9.89e-15	intronic	.	0.3552	0.3223	1.9e-17	-0.58	Brain - Cerebellum
rs11726056	4:76584194	C	0.3738	0.4686	0.6771	6.39e-20	intronic	.	0.4256	0.4121	6.8e-18	-0.33	Muscle - Skeletal
rs3796494	4:76586291	C	0.2471	0.3072	0.7402	1.8e-10	intronic	.	0.2808	0.2622	3e-06	-0.13	Esophagus - Mucosa
rs13110204	4:76589357	C	0.4925	0.4339	1.266	1.99e-08	intronic	.	.	.	6.9e-11	-0.24	Muscle - Skeletal
rs61090632	4:76589448	A	0.5087	0.4337	1.352	7.38e-13	intronic	.	.	.	6.9e-11	-0.24	Muscle - Skeletal
rs10428497	4:76598951	C	0.2571	0.3158	0.7497	6.78e-10	intronic	.	0.2897	0.2708	2e-07	0.15	Skin - Sun Exposed (Lower leg)
rs34727364	4:76600151	C	0.2633	0.3196	0.7609	3.89e-09	intronic	.	0.2927	0.2691	.	.	.
rs779510538	4:76600336	T	0.323	0.385	0.7624	7.27e-10	intronic	.	.	.	6e-20	0.59	Brain - Cerebellar Hemisphere
rs111690409	4:76607194	T	0.2822	0.3373	0.7724	1.45e-08	intronic	.	0.3165	0.2907	5.5e-08	0.15	Skin - Sun Exposed (Lower leg)
.	4:76607668	C	0.3372	0.4025	0.7554	1.26e-10	intronic	.	.	.	2.2e-20	0.62	Brain - Cerebellar Hemisphere
rs72868158	4:76607762	T	0.284	0.3371	0.7797	4.63e-08	intronic	.	0.3165	0.2918	6.2e-09	0.17	Skin - Sun Exposed (Lower leg)
rs113068018	4:76610715	AT	0.2802	0.337	0.7662	5.28e-09	intronic	.	0.3165	0.2906	5.5e-08	0.15	Skin - Sun Exposed (Lower leg)
rs143239231	4:76614559	T	0.03659	0.06648	0.5333	2.36e-10	intronic	.	0.0476	0.0506	.	.	.
rs11097446	4:76616368	A	0.2748	0.336	0.7487	2.62e-10	intronic	.	0.3165	0.2886	7.1e-08	0.15	Skin - Sun Exposed (Lower leg)
rs10010009	4:76616835	C	0.2889	0.3497	0.7556	5.74e-10	intronic	.	0.3175	0.2983	2.2e-08	0.16	Skin - Sun Exposed (Lower leg)
rs35916271	4:76617283	ATAG	0.2862	0.3539	0.732	5.29e-12	intronic	.	0.3165	0.2981	5.3e-09	0.17	Skin - Sun Exposed (Lower leg)
rs61530665	4:76619036	T	0.2872	0.3535	0.7368	1.42e-11	intronic	.	0.3165	0.2998	5.3e-09	0.17	Skin - Sun Exposed (Lower leg)
rs61342109	4:76619184	G	0.2882	0.3539	0.7392	2.23e-11	intronic	.	0.3165	0.3001	5.3e-09	0.17	Skin - Sun Exposed (Lower leg)
rs28668115	4:76619736	A	0.2865	0.3541	0.7323	5.56e-12	intronic	.	0.3165	0.2985	5.3e-09	0.17	Skin - Sun Exposed (Lower leg)
rs28410673	4:76619740	A	0.2865	0.3539	0.7329	6.35e-12	intronic	.	0.3165	0.2988	5.3e-09	0.17	Skin - Sun Exposed (Lower leg)
rs10005604	4:76619864	A	0.2792	0.3539	0.7073	2.42e-14	intronic	.	0.3165	0.2993	5.3e-09	0.17	Skin - Sun Exposed (Lower leg)
rs10017322	4:76620020	G	0.2173	0.3505	0.5144	2.5e-44	intronic	.	0.3165	0.2932	5.3e-09	0.17	Skin - Sun Exposed (Lower leg)
rs4859454	4:76620356	T	0.2882	0.3537	0.7398	2.54e-11	intronic	.	0.3165	0.2982	5.3e-09	0.17	Skin - Sun Exposed (Lower leg)
rs4859698	4:76620358	A	0.2877	0.3537	0.738	1.78e-11	intronic	.	0.3165	0.2974	5.3e-09	0.17	Skin - Sun Exposed (Lower leg)
rs11097449	4:76620513	C	0.2877	0.3541	0.7368	1.37e-11	intronic	.	0.3165	0.2997	5.3e-09	0.17	Skin - Sun Exposed (Lower leg)
rs144594843	4:76620936	CAGG	0.2872	0.3507	0.7461	9.58e-11	intronic	.	0.3165	0.2971	5.3e-09	0.17	Skin - Sun Exposed (Lower leg)
rs28398292	4:76621536	A	0.2867	0.3535	0.735	9.9e-12	intronic	.	0.3155	0.3005	2.5e-09	0.18	Skin - Sun Exposed (Lower leg)
rs28372129	4:76623853	A	0.2937	0.3598	0.7398	2.03e-11	intronic	.	0.3214	0.3056	2.7e-10	0.2	Skin - Sun Exposed (Lower leg)
rs10222847	4:76626789	A	0.273	0.3451	0.7126	1.22e-13	intronic	.	0.3075	0.2858	2.3e-10	0.2	Skin - Sun Exposed (Lower leg)
rs7694149	4:76630255	A	0.2738	0.3438	0.7195	5.88e-13	intronic	.	0.3075	0.2872	2.3e-10	0.2	Skin - Sun Exposed (Lower leg)
rs344124	4:76637624	T	0.4467	0.3825	1.304	4.58e-10	intronic	.	.	.	2.3e-27	-0.42	Muscle - Skeletal
rs1389264	4:76641385	A	0.444	0.383	1.286	3.34e-09	intronic	.	.	.	4.2e-25	-0.4	Muscle - Skeletal
rs344122	4:76641805	C	0.441	0.383	1.271	1.84e-08	intronic	.	.	.	4.2e-25	-0.4	Muscle - Skeletal
rs344123	4:76643316	G	0.4465	0.383	1.299	7.62e-10	intronic	.	.	.	1.4e-25	-0.41	Muscle - Skeletal
rs13114029	4:76654115	G	0.1003	0.06781	1.533	1.58e-08	intronic	.	0.0486	0.0682	.	.	.
rs17002139	4:76655249	G	0.2641	0.332	0.7219	1.72e-12	intronic	.	0.3056	0.284	1.6e-10	0.2	Skin - Sun Exposed (Lower leg)
rs16996461	4:76658004	C	0.268	0.3316	0.7381	4.3e-11	intronic	.	0.3065	0.2821	7.9e-08	0.15	Skin - Sun Exposed (Lower leg)
rs11735865	4:76662838	T	0.3417	0.404	0.7658	8.7e-10	intronic	.	0.3601	0.3565	8.8e-07	0.42	Brain - Cerebellum
rs4859706	4:76663889	G	0.2646	0.3314	0.7257	3.77e-12	intronic	.	0.3075	0.2823	1.4e-07	0.15	Skin - Sun Exposed (Lower leg)
rs16996468	4:76675042	C	0.2506	0.3156	0.7252	7.3e-12	intronic	.	0.3065	0.2747	1.5e-07	0.15	Skin - Sun Exposed (Lower leg)
rs34181315	4:76685387	C	0.3375	0.4011	0.7605	3.42e-10	intronic	.	0.3611	0.3573	.	.	.
rs344124	4:76704726	T	0.4281	0.3716	1.266	3.65e-08	intronic	.	.	.	2.3e-14	-0.33	Muscle - Skeletal
rs1389264	4:76714751	C	0.4913	0.4291	1.285	2.64e-09	intronic	.	.	.	3.3e-08	0.13	Nerve - Tibial
rs344122	4:76716349	C	0.4542	0.3926	1.288	2.54e-09	intronic	.	.	.	2.2e-14	-0.32	Muscle - Skeletal
rs344123	4:76716860	C	0.4557	0.3924	1.296	9.31e-10	intronic	.	.	.	2.3e-14	-0.32	Muscle - Skeletal
rs344095	4:76724299	A	0.1909	0.2444	0.7295	7.83e-10	intronic	.	0.256	0.2373	5.9e-23	-0.2	Nerve - Tibial
rs344129	4:76726132	A	0.2163	0.2676	0.7552	1.25e-08	intronic	.	0.2738	0.2561	3.1e-21	-0.2	Nerve - Tibial
rs344130	4:76726437	C	0.1789	0.2676	0.5964	7.86e-24	intronic	.	0.2738	0.255	3.1e-21	-0.2	Nerve - Tibial
rs344131	4:76726629	G	0.1745	0.2674	0.5789	3.47e-26	intronic	.	0.2728	0.2566	3.1e-21	-0.2	Nerve - Tibial
rs344132	4:76726690	C	0.1914	0.2674	0.6484	1.1e-17	intronic	.	0.2728	0.2574	6.1e-21	-0.2	Nerve - Tibial
rs6820254	4:76734771	G	0.2128	0.2674	0.7405	1.27e-09	intronic	.	0.2738	0.2576	2.3e-20	-0.2	Nerve - Tibial
rs34272002	4:76736806	CAG	0.2163	0.2657	0.7626	4.03e-08	intronic	.	0.2718	0.2556	3.7e-20	-0.2	Nerve - Tibial
rs78361856	4:76737660	GT	0.2016	0.264	0.7039	2.52e-12	intronic	.	0.2679	0.252	1.7e-22	-0.21	Nerve - Tibial
rs11283219	4:76737926	GTGCCA	0.2143	0.2672	0.7478	4.11e-09	intronic	.	0.2708	0.2564	1e-20	-0.2	Nerve - Tibial
rs344139	4:76737937	C	0.2081	0.2648	0.7296	2.42e-10	intronic	.	0.2669	0.2507	1.7e-22	-0.21	Nerve - Tibial
rs344140	4:76739009	C	0.4447	0.3811	1.301	6.71e-10	exonic	.	.	.	4.2e-13	-0.31	Muscle - Skeletal
rs344141	4:76739578	G	0.2153	0.2644	0.7633	4.74e-08	exonic	0.2508	0.2688	0.2549	6.7e-20	-0.2	Nerve - Tibial
rs344142	4:76741095	A	0.1901	0.2625	0.6597	2.7e-16	exonic	0.348	0.2669	0.2522	6.2e-20	-0.2	Nerve - Tibial
rs344143	4:76741156	T	0.1961	0.2613	0.6896	1.85e-13	exonic	0.4261	0.2669	0.2511	9.1e-09	-0.21	Muscle - Skeletal
rs344127	4:76750211	A	0.4438	0.3794	1.305	4.22e-10	intronic	.	.	.	9.1e-07	-0.24	Muscle - Skeletal
.	4:76773105	G	0.5271	0.4688	1.263	2.56e-08	intronic	.	.	.	.	.	.
rs398107524	4:76789079	CA	0.17	0.2261	0.701	2.55e-11	intergenic	.	0.2222	0.2244	3.6e-05	0.47	Brain - Cerebellar Hemisphere
rs79640644	4:76790858	A	0.3808	0.3225	1.292	5.19e-09	intergenic	.	.	.	.	.	.
.	4:76792721	T	0.4482	0.3848	1.299	7.67e-10	intergenic	.	.	.	.	.	.
rs35790068	4:76796764	ATAT	0.1493	0.2274	0.5963	4.07e-21	intergenic	.	.	0.2205	.	.	.
rs56998018	4:76796786	A	0.1643	0.2312	0.6534	1.78e-15	intergenic	.	0.2163	0.2262	.	.	.
.	4:76812919	C	0.5431	0.464	1.373	4.58e-14	intergenic	.	.	0.0004	.	.	.
rs770534396	4:76813630	G	0.5373	0.4499	1.42	7.16e-17	intergenic	.	.	.	8.2e-05	-0.092	Skin - Sun Exposed (Lower leg)
rs1586933	4:76814253	T	0.5329	0.451	1.388	5.8e-15	intergenic	.	.	.	8.8e-05	-0.091	Skin - Sun Exposed (Lower leg)
rs74938902	4:76814673	T	0.2989	0.3581	0.7642	2.04e-09	intergenic	.	0.3224	0.3247	.	.	.
rs12645488	4:76815448	A	0.2999	0.3613	0.7572	5.27e-10	intergenic	.	0.3224	0.3259	.	.	.
rs6821337	4:76817010	C	0.3342	0.392	0.7787	1.09e-08	intergenic	.	0.3472	0.3513	.	.	.
rs6843613	4:76817247	A	0.3325	0.3905	0.7776	9.26e-09	intergenic	.	0.3472	0.3497	.	.	.
rs6821529	4:76817262	G	0.3345	0.3912	0.7821	1.94e-08	intergenic	.	0.3472	0.3501	.	.	.
rs11938295	4:76818449	G	0.511	0.4469	1.293	9.16e-10	intergenic	.	0.4494	0.4824	.	.	.
.	4:76820631	A	0.4149	0.4737	0.7877	1.66e-08	intergenic	.	.	.	.	.	.
.	4:76820964	C	0.4047	0.463	0.7883	1.99e-08	intergenic	.	.	.	.	.	.
.	4:76823426	T	0.4238	0.485	0.7813	4.88e-09	intergenic	.	.	.	.	.	.
rs12646865	4:76825887	C	0.344	0.4217	0.7189	2.67e-14	intergenic	.	0.4256	0.3889	.	.	.
rs73826442	4:76826734	G	0.2897	0.3451	0.7738	1.47e-08	intergenic	.	0.3284	0.3159	.	.	.
rs12649202	4:76827690	A	0.2944	0.3493	0.7772	2.26e-08	intergenic	.	0.3294	0.3224	.	.	.
rs9790690	4:76830239	A	0.2531	0.3164	0.7322	2.75e-11	intergenic	.	0.3026	0.2913	.	.	.
rs11315325	4:76830686	G	0.2944	0.3806	0.6792	4.87e-18	intergenic	.	0.37	0.3394	.	.	.
rs9790694	4:76830809	T	0.2785	0.3659	0.6689	6.56e-19	intergenic	.	0.3621	0.3189	.	.	.
rs11097538	4:76832543	T	0.2763	0.339	0.7441	1e-10	intergenic	.	0.3333	0.3163	.	.	.
rs4467595	4:76838260	C	0.3333	0.3884	0.7871	4.63e-08	intergenic	.	0.373	0.3683	.	.	.
rs11097547	4:76841917	G	0.2857	0.3541	0.7296	3.21e-12	intergenic	.	0.3482	0.3369	.	.	.
.	4:76847433	C	0.3186	0.3787	0.7671	1.96e-09	intergenic	.	.	.	.	.	.
rs12511448	4:76853237	C	0.09781	0.1486	0.6213	3.25e-13	intergenic	.	0.1409	0.1287	.	.	.
rs71607390	4:76854459	G	0.09806	0.1488	0.6221	3.59e-13	intergenic	.	0.1389	0.1273	.	.	.
rs10017241	4:76855772	G	0.1289	0.1909	0.6274	1.46e-15	intergenic	.	0.1845	0.1677	.	.	.
rs344837	4:76857334	C	0.09905	0.149	0.6282	9.22e-13	intergenic	.	0.1399	0.1275	.	.	.
rs35606844	4:76860315	C	0.09657	0.149	0.6107	5.26e-14	intergenic	.	0.1389	0.1271	.	.	.
rs35778249	4:76860340	C	0.09756	0.149	0.6177	1.69e-13	intergenic	.	0.1389	0.1268	.	.	.
rs383050	4:76860357	C	0.2469	0.3	0.7649	1.5e-08	intergenic	.	0.2778	0.266	.	.	.
rs432900	4:76863595	G	0.2397	0.2933	0.7594	8.12e-09	intergenic	.	0.2688	0.2579	.	.	.
rs3035762	4:76881159	ATAG	0.1565	0.2042	0.7234	4.31e-09	intergenic	.	0.2192	0.203	.	.	.
