# Supplementary material for: Commoncis-regulatory variation modifies the penetrance of pathogenicSHROOM3variants in craniofacial microsomia
Source: HighWire-hosted journal article supplement (doi:10.1101/gr.280047.124), 2025-04-15
Supplement: Supplemental_Table_S5.xlsx [file Supplemental_Table_S5.xlsx]

## Sheet: S. Table 5
Supplementary Table 5. CFM-associated variants situated within the cis-regulatory elements of the SHROOM3 gene in stem cells
ID	Position	Reference allele	Alternative allele	associated P	Promoter histone marks	Enhancer histone marks	DNAse	GRASP QTL hits	Selected eQTL hits	Function
rs74918804	76435387	-	C	3.14e-11	ESC, ESDR, IPSC	IPSC, ESC	ESDR,ESC		1 hit	UTR5
rs189707263	76436345	G	T	2.72e-11	ESC, ESDR, IPSC	ESC			2 hits	intronic
rs4859445	76460915	T	C	1.87e-27		ESC, ESDR, IPSC		1 hit	2 hits	intronic
rs7654608	76548753	G	A	8.08e-11		ESC, ESDR		1 hit	1 hit	intronic
rs9995957	76549429	A	C	2.99e-11		ESDR			1 hit	intronic
rs13120833	76549963	T	C	8.7e-11		ESDR			1 hit	intronic
rs62300891	76551518	C	T	2.41e-08		ESDR	ESDR		1 hit	intronic
rs6812051	76569817	A	G	5.35e-17		ESDR, ESC			1 hit	intronic
rs6824297	76571002	T	G	1.49e-08		ESC, ESDR			1 hit	intronic
rs13148163	76583247	T	C	1.16e-10		ESDR		1 hit	2 hits	intronic
rs4859695	76601274	G	T	8.16e-08		ESDR, ESC			1 hit	intronic
rs11723275	76607668	A	C	1.26e-10	IPSC	ESC, ESDR	ESC,ESDR		3 hits	intronic
rs72868158	76607762	C	T	7.82e-08	IPSC	ESC, ESDR	ESC,ESDR		1 hit	intronic
rs7669852	76621245	G	A	1.07e-12		ESDR	ESC	1 hit	3 hits	intronic
rs28372129	76623853	G	A	2.53e-11	ESDR	ESC, ESDR, IPSC			1 hit	intronic
rs7694149	76630255	G	A	5.88e-13		ESDR			1 hit	intronic
rs6532535	76641385	T	A	3.34e-09		ESC, IPSC			3 hits	intronic
rs17002139	76655249	A	G	1.91e-12		ESDR		1 hit	1 hit	intronic
rs28595011	76701105	T	C	8.13e-08		ESDR			1 hit	intronic
rs344095	76724299	G	A	9.13e-10		ESC, ESDR, IPSC			2 hits	intronic
rs344129	76726132	T	A	1.58e-08		ESC, ESDR,IPSC			3 hits	intronic
rs344130	76726437	T	C	2.84e-22		ESDR, ESC	ESDR		3 hits	intronic
rs344131	76726629	A	G	2.44e-24		ESDR	ESDR		3 hits	intronic
rs344132	76726690	A	C	6.24e-17		ESDR	ESDR		3 hits	intronic
rs344134	76729160	T	A	5.43e-08		ESC, ESDR, IPSC			2 hits	intronic
rs344137	76733659	A	G	2.18e-08		ESC, ESDR, IPSC	ESC,IPSC		3 hits	intronic
rs344139	76737937	T	C	2.63e-10		ESDR			2 hits	intronic
rs344141	76739578	C	G	5.1e-08		ESDR		1 hit	2 hits	exonic
rs344144	76742109	T	C	7.38e-08		ESDR			3 hits	intronic
rs344126	76757575	G	A	9.04e-09		ESDR			2 hits	intronic
