# Supplementary material for: Commoncis-regulatory variation modifies the penetrance of pathogenicSHROOM3variants in craniofacial microsomia
Source: HighWire-hosted journal article supplement (doi:10.1101/gr.280047.124), 2025-04-15
Supplement: Supplemental_Table_S6.xlsx [file Supplemental_Table_S6.xlsx]

## Sheet: S. Table 6
Supplementary Table 6. Fine-Mapping results of variants in SHROOM3
putative causal variants	Conditional analysis	CAVIAR	FINEMAP	PAINTOR	eQTL
rs113770925	D	ND	ND	ND	no
rs4859679	D	ND	ND	ND	no
rs6532417	D	ND	ND	ND	yes
rs2137153	D	ND	ND	ND	yes
rs5003588	D	ND	ND	ND	no
rs6532475	D	ND	ND	ND	no
rs75802673	D	ND	ND	ND	no
rs6848837	D	ND	ND	ND	yes
rs11726056	D	ND	ND	ND	yes
rs10017322	D	D	D	D	yes
rs9993810	D	ND	ND	ND	yes
rs344131	D	D	D	D	yes
rs7682160	D	ND	ND	ND	yes
rs35790068	D	ND	ND	ND	no
rs6818628	D	ND	ND	ND	no
rs432900	D	ND	ND	ND	no
D and ND represent the variant was Detected or Not Detected as causal variants using different methods
