# Supplementary material for: Commoncis-regulatory variation modifies the penetrance of pathogenicSHROOM3variants in craniofacial microsomia
Source: HighWire-hosted journal article supplement (doi:10.1101/gr.280047.124), 2025-04-15
Supplement: Supplemental_Table_S7.xlsx [file Supplemental_Table_S7.xlsx]

## Sheet: S.Table 7
Supplementary Table 7. The deleterious variants in SF3B2 identified from 2,625 controls used in this study.
SNP ID	Chr	Start	End	Ref	Alt	Func.refGene	Exon	mRNA change	AA change	Allele frequency			Allele frequency in East Asian			Deleterious prediction					Conservation			Interpro_domain
										ExAC	1000G	gnomad	ExAC	1000G	gnomad	SIFT	Polyphen2	CADD	|ESM|	AlphaMissense	GERP++	phyloP	phastCons
.	Chr11	66052389	66052389	C	T	NM_006842	exon1	c.C5T	p.A2V	.	.	6.573e-06	.	.	0	D	D	28.9	6.737	ambiguous	5	4.356	1	.
.	Chr11	66052401	66052401	C	T	NM_006842	exon1	c.C17T	p.P6L	.	.	.	.	.	.	D	B	26.9	4.412	likely_benign	4.07	3.127	1	.
rs750805181	Chr11	66052405	66052405	G	C	NM_006842	exon1	c.G21C	p.E7D	8.513e-06	.	.	0	.	.	D	P	22.9	5.49	likely_benign	-0.175	0.33	0.163	.
rs768827765	Chr11	66052413	66052413	A	G	NM_006842	exon1	c.A29G	p.K10R	1.698e-05	.	.	0	.	.	D	P	23.9	3.233	likely_benign	5.09	0.656	0.304	.
rs536594368	Chr11	66052425	66052425	A	C	NM_006842	exon1	c.A41C	p.Q14P	7.633e-05	0.000199681	0.0003	0.0001	.	0	T	P	19.93	4.857	likely_benign	5.09	2.509	1	.
rs759397683	Chr11	66052426	66052426	G	T	NM_006842	exon1	c.G42T	p.Q14H	8.482e-06	.	.	0.0001	.	.	D	D	22.8	1.573	likely_benign	5.09	3.81	1	.
rs146381373	Chr11	66052428	66052428	-	GCC	NM_006842	exon1	c.44_45insGCC	p.P21_G22insP	0.013	0.0265575	0.0048	0.0742	0.0774	0.0794	.	.	.			.	.	.	.
rs11554199	Chr11	66052460	66052460	G	T	NM_006842	exon1	c.G76T	p.A26S	0.0067	0.00319489	0.0061	0	.	0	D	B	24	2.965	likely_benign	4.16	3.057	1	SAP domain
rs761859619	Chr11	66053036	66053036	G	A	NM_006842	exon3	c.G190A	p.V64M	1.647e-05	.	1.315e-05	0	.	0	D	D	25.1	5.349	likely_benign	5.27	5.528	1	.
rs775280803	Chr11	66055118	66055118	C	G	NM_006842	exon4	c.C301G	p.P101A	8.932e-06	.	.	0.0001	.	.	T	D	13.17	5.87	likely_benign	5.42	3.932	0.997	.
rs35383513	Chr11	66055149	66055149	C	T	NM_006842	exon4	c.C332T	p.P111L	1.751e-05	.	.	0.0002	.	.	T	P	25.2	5.365	likely_benign	5.42	4.072	0.983	.
.	Chr11	66055187	66055187	C	G	NM_006842	exon4	c.C370G	p.P124A	.	.	.	.	.	.	T	P	22.9	5.714	likely_benign	5.42	4.441	0.999	.
.	Chr11	66055267	66055267	-	CAG	NM_006842	exon4	c.450_451insCAG	p.Q153_A154insQ	.	.	.	.	.	.	.	.	.			.	.	.	.
rs746845668	Chr11	66055583	66055583	C	T	NM_006842	exon5	c.C547T	p.R183W	8.241e-06	.	.	0	.	.	D	B	25.9	8.977	likely_pathogenic	1.28	-0.037	0.986	.
rs745455612	Chr11	66056908	66056908	C	T	NM_006842	exon6	c.C620T	p.P207L	0.0001	.	.	0	.	.	D	P	23.1	4.817	likely_benign	5.97	2.874	1	.
rs763554014	Chr11	66056935	66056935	G	A	NM_006842	exon6	c.G647A	p.R216H	4.131e-05	.	1.972e-05	0.0002	.	0	D	D	23.7	5.196	likely_benign	5.76	4.148	0.992	.
rs187615832	Chr11	66057301	66057301	A	G	NM_006842	exon7	c.A703G	p.T235A	5.039e-05	0.000199681	2.631e-05	0.0007	0.001	0.0008	T	B	14.83	2.692	likely_benign	4.12	0.742	0.414	.
rs886612846	Chr11	66057332	66057332	G	A	NM_006842	exon7	c.G734A	p.R245Q	.	.	.	.	.	.	T	P	23.4	4.445	likely_benign	5.31	6.99	1	.
rs77713633	Chr11	66057350	66057350	C	T	NM_006842	exon7	c.C752T	p.P251L	0.0006	0.000599042	0.0005	0	.	0	D	B	31	4.634	likely_benign	4.35	3.228	0.981	.
.	Chr11	66058837	66058837	G	A	NM_006842	exon10	c.G974A	p.R325Q	.	.	1.315e-05	.	.	0	T	D	16.11	5.124	ambiguous	3.26	6.966	1	.
rs542236228	Chr11	66058870	66058870	C	A	NM_006842	exon10	c.C1007A	p.P336H	2.496e-05	0.000199681	3.945e-05	0.0004	0.001	0.0012	D	P	23	4.07	likely_benign	5.36	3.877	1	.
rs200930603	Chr11	66058935	66058935	C	T	NM_006842	exon10	c.C1072T	p.R358C	.	0.000199681	6.576e-06	.	0.001	0.0002	D	D	24.6	6.574	likely_benign	5.45	1.29	0.671	.
rs146416948	Chr11	66058973	66058973	G	C	NM_006842	exon10	c.G1110C	p.E370D	0.0005	0.000399361	0.0002	0	.	0	T	P	24.4	7.57	likely_pathogenic	2.61	2.806	1	.
rs769657915	Chr11	66061719	66061719	A	C	NM_006842	exon15	c.A1813C	p.K605Q	1.648e-05	.	2.628e-05	0.0001	.	0.0002	D	D	28.2	10.827	likely_pathogenic	5.77	8.887	1	PSP, proline-rich
.	Chr11	66061969	66061969	A	G	NM_006842	exon16	c.A1948G	p.I650V	.	.	.	.	.	.	T	P	24.1	8.216	likely_pathogenic	5.8	8.786	1	PSP, proline-rich
rs373693836	Chr11	66063720	66063720	C	T	NM_006842	exon19	c.C2321T	p.A774V	8.535e-05	0.000399361	7.232e-05	0.0003	.	0	T	P	29.8	5.412	ambiguous	5.34	5.305	1	.
